# Supplementary material
Source: PubMed Central journal article supplement (PMC6437697)

Binding to an unusual inactive kinase  
conformation by highly selective inhibitors of  
inositol-requiring enzyme 1 $\alpha$  kinase-  
endoribonuclease

*Giampiero Colombano<sup>1</sup>, John J. Caldwell<sup>1</sup>, Thomas P. Matthews<sup>1</sup>, Chitra Bhatia<sup>3</sup>, Amar Joshi<sup>3</sup>, Tatiana McHardy<sup>1</sup>, Ngai Yi Mok<sup>1</sup>, Yvette Newbatt<sup>1</sup>, Lisa Pickard<sup>1</sup>, Jade Strover<sup>2</sup>, Somaieh Hedayat<sup>1</sup>, Michael I. Walton<sup>1</sup>, Stephanie M. Myers<sup>1</sup>, Alan M. Jones<sup>1</sup>, Harry Saville<sup>1</sup>, Craig McAndrew<sup>1</sup>, Rosemary Burke<sup>1</sup>, Suzanne A. Eccles<sup>1</sup>, Faith E. Davies<sup>2,†</sup>, Richard Bayliss<sup>3,4</sup>, Ian Collins<sup>1,\*</sup>*

1. Cancer Research UK Cancer Therapeutics Unit and 2. Division of Molecular Pathology,

The Institute of Cancer Research, London, SW7 3RP, U.K.

3. Department of Molecular and Cell Biology, University of Leicester, LE1 7RH, U.K.

4. School of Molecular and Cellular Biology, Faculty of Biological Sciences, University of Leeds, LS2 9JT, U.K.

**Supporting Information**

**Contents:**

1. Supplementary Figure S1: Mass spectrometry characterisation of dephosphorylated and phosphorylated recombinant G547 IRE1 $\alpha$  proteins.
2. Supplementary Figure S2: Schematic of the cleavage of a fluorescence-labelled stem-loop RNA used to measure inhibition of IRE1 $\alpha$  RNase activity *in vitro*.
3. Supplementary Figure S3: Compounds **26** and **31** have selectivity for IRE1 $\alpha$  over IRE1 $\beta$  in a kinase binding assay.
4. Supplementary Figure S4: Crystal structure of **33**-IRE1 $\alpha$ .
5. Supplementary Figure S5: Model of the binding of **26** to IRE1 $\alpha$ .
6. Supplementary Figure S6: Compounds **26** and **31** inhibit IRE1 $\alpha$  oligomerisation (quantified by GFP-IRE1 $\alpha$  foci formation) and RNase activity in HEK293 cells.
7. Supplementary Figure S7: Compounds **26** and **31** inhibit IRE1 $\alpha$ -dependent XBP1s mRNA expression in H929 cells.
8. Supplementary Figure S8: Compounds **31** and **26** dose-dependently inhibit tunicamycin-induced expression of pS724 IRE1 $\alpha$  in H929 cells.
9. Supplementary Figure S9: Compounds **26** and **31** dose-dependently inhibit tunicamycin-induced expression of XBP1s in NCI-H929 cells, quantified by immunofluorescence. Structure and activities of difluorobenzyl)-1H-pyrazol-4-yl)-3H-imidazo[4,5-b]pyridine used at high concentration (20-50  $\mu$ M) as a normalization control.
10. Supplementary Figure S10: In vitro autophosphorylation, ATP-site binding and RNase assay titrations for compounds **2**, **26** and **31**.

11. Supplementary Table S1: Selectivity profile of compounds **2**, **26** and **31** tested against 455 human kinases at 1000 nM.
12. Supplementary Table S2: HPLC purities of test compounds **2**, **5 – 12**, **19 – 33**.
13. Methods for generation of an HEK293TN XBP1 luciferase reporter cell line.
14. Methods to determine inhibition of an XBP1 luciferase reporter in HEK293TN cells and assess compound cytotoxicity to HEK293TN cells.
15. Methods to quantify XBP1s expression in NCI-H929 cells by immunofluorescence.
16. Methods to quantify XBP1s and DNAJB9 mRNA expression in NCI-H929 cells by qPCR.
17. Method quantify inhibition of IRE1 $\alpha$ -GFP oligomerisation in T-Rex293-IRE1-3F6HGFP cells.
18. Methods to assess total IRE1 $\alpha$  and pIRE1 $\alpha$  expression in H929 myeloma cells.
19. Methods for X-ray crystallography of **33**-IRE1 $\alpha$ .
20. Table S3: Data collection and refinement statistics for the crystal structures of **2**-IRE1 $\alpha$  and **33**-IRE1 $\alpha$ .
21. Methods for the synthesis of compound **33**.
22. Copies of  $^1\text{H}$  and  $^{13}\text{C}$  NMR spectra for test compounds **2**, **5 – 12**, **19 – 33**.
23. Copies of HPLC traces for test compounds **2**, **5 – 12**, **19 – 33**.

## 1. Supplementary Figure S1

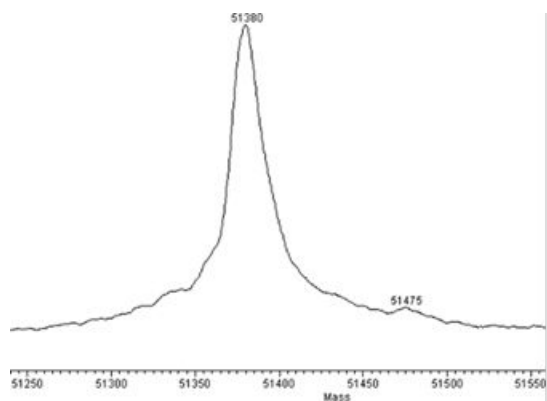

G547 IRE1 $\alpha$  ( $\lambda$ -phosphatase treated)  
M= 51380

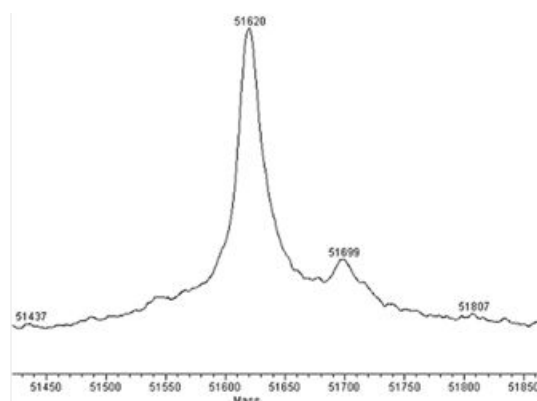

G547 IRE1 $\alpha$  (incubated with ATP)  
M= 51620

**Supplementary Figure S1:** Mass spectrometry characterisation of dephosphorylated and phosphorylated recombinant G547 IRE1 $\alpha$  proteins.

## 2. Supplementary Figure S2

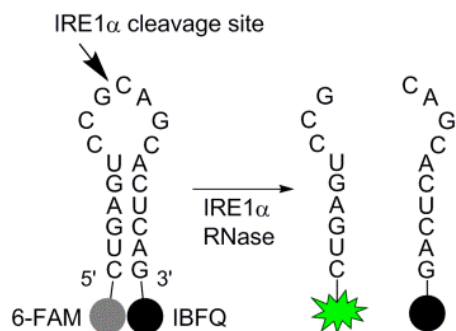

**Supplementary Figure S2:** Schematic of the cleavage of a fluorescence-labelled stem-loop RNA used to measure inhibition of IRE1 $\alpha$  RNase activity *in vitro*.

## 3. Supplementary Figure S3

A

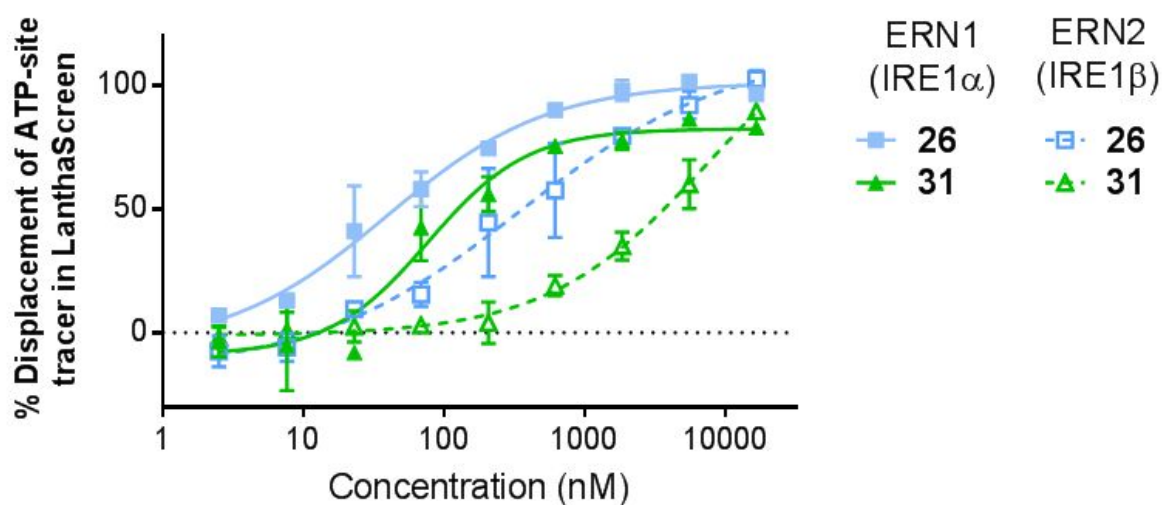

**26** IRE1 $\alpha$  IC<sub>50</sub> = 39 nM; IRE1 $\beta$  IC<sub>50</sub> = 345 nM

**31** IRE1 $\alpha$  IC<sub>50</sub> = 77 nM; IRE1 $\beta$  IC<sub>50</sub> = 7682 nM

B

| IRE1 $\alpha$ | IRE1 $\beta$ | IRE1 $\alpha$ | IRE1 $\beta$ | IRE1 $\alpha$ | IRE1 $\beta$ |
|---------------|--------------|---------------|--------------|---------------|--------------|
| Leu577        | Leu          | Ile642        | Leu          | Glu651        | Glu          |
| Val586        | Val          | Glu643        | Glu          | Phe712        | Phe          |
| Ala597        | Ala          | Leu644        | Leu          | His723        | Cys          |
| Lys599        | Lys          | Cys645        | Cys          | Phe725        | Phe          |
| Ile626        | Leu          | Ala646        | Arg          |               |              |
| Tyr628        | Tyr          | Ala647        | Ala          |               |              |

**Supplementary Figure S3: A)** Compounds **26** and **31** have selectivity for IRE1 $\alpha$  over IRE1 $\beta$  in parallel kinase binding assays (LanthaScreen format, SelectScreen profiling service conducted at Life Technologies (now Thermo Fisher) <https://www.thermofisher.com/uk/en/home/products-and-services/services/custom-services/screening-and-profiling-services/selectscreen-profiling-service.html> ); **B)** Amino acid residues of the binding site of **2** to IRE1 $\alpha$ , and the corresponding residues in the sequence of IRE1 $\beta$ .<sup>34</sup>

## 4. Supplementary Figure S4

**A**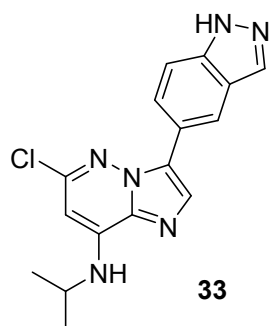IRE1 $\alpha$  S726 autophosphorylation IC<sub>50</sub> = 276 ( $\pm$ 108) nMIRE1 $\alpha$  ATP site binding IC<sub>50</sub> = 736 ( $\pm$ 491) nM**B**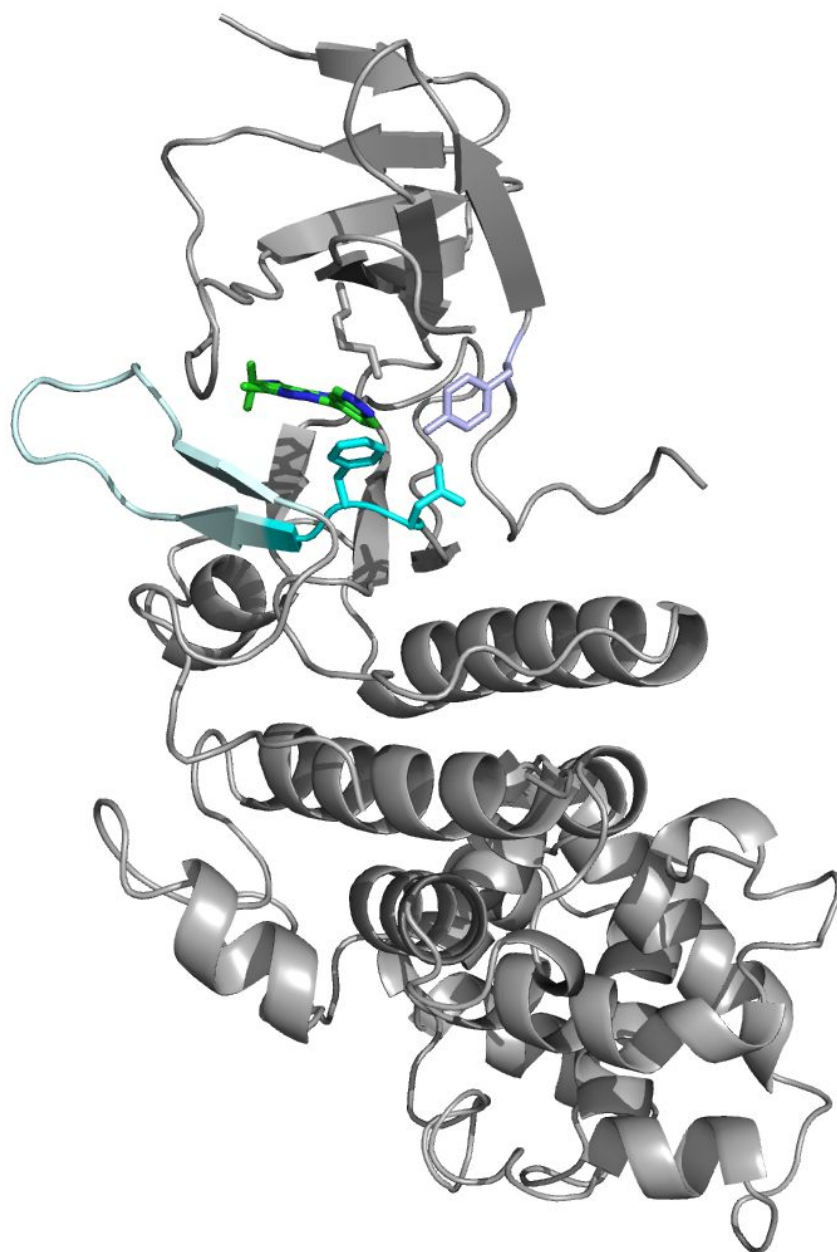

**Supplementary Figure S4: A)** Structure and IRE1 $\alpha$  inhibition of compound **33**; **B)** Crystal structure (PDB 6hv0) of **33** (green sticks) bound to IRE1 $\alpha$  KEN domain (grey cartoon) showing the conformations of the DFG motif (cyan), activation loop segment (pale cyan), Y628 (blue) and K599 (grey).



## 5. Supplementary Figure S5

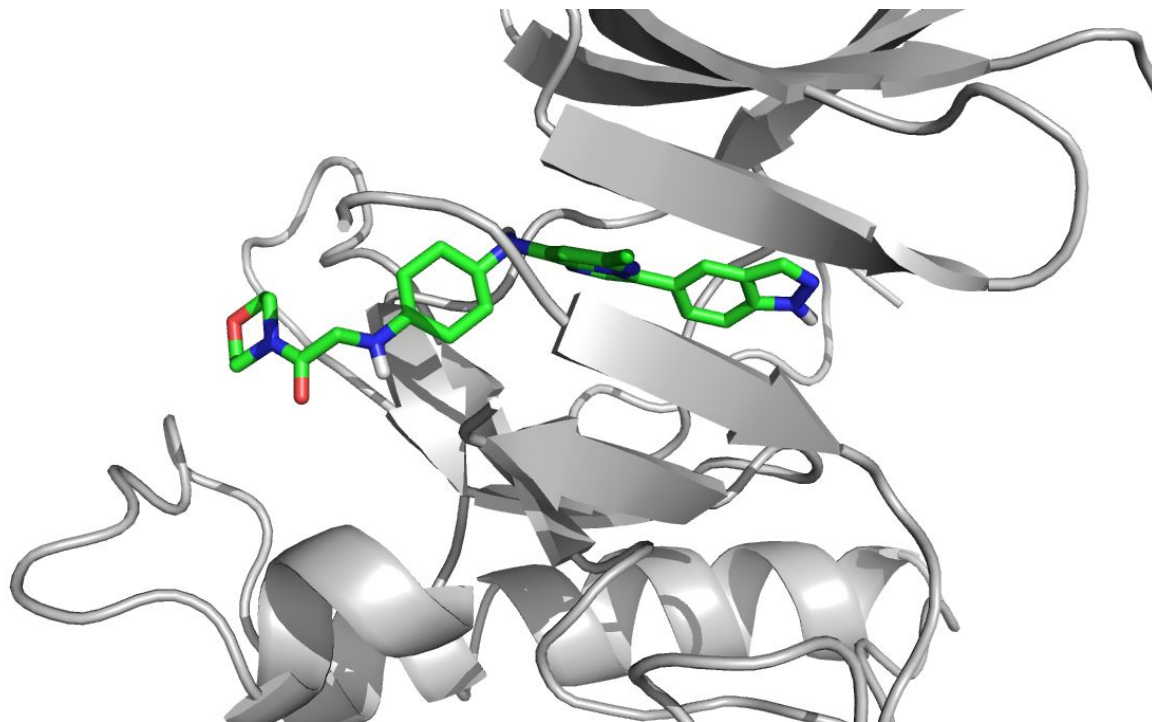

**Supplementary Figure S5:** Model of the binding of **26** (green sticks) to IRE1 $\alpha$  (grey cartoon) using the kinase conformation observed for **2**-IRE1 $\alpha$  (PDB 6hx1). Detail of the ATP-binding site shown.

## 6. Supplementary Figure S6

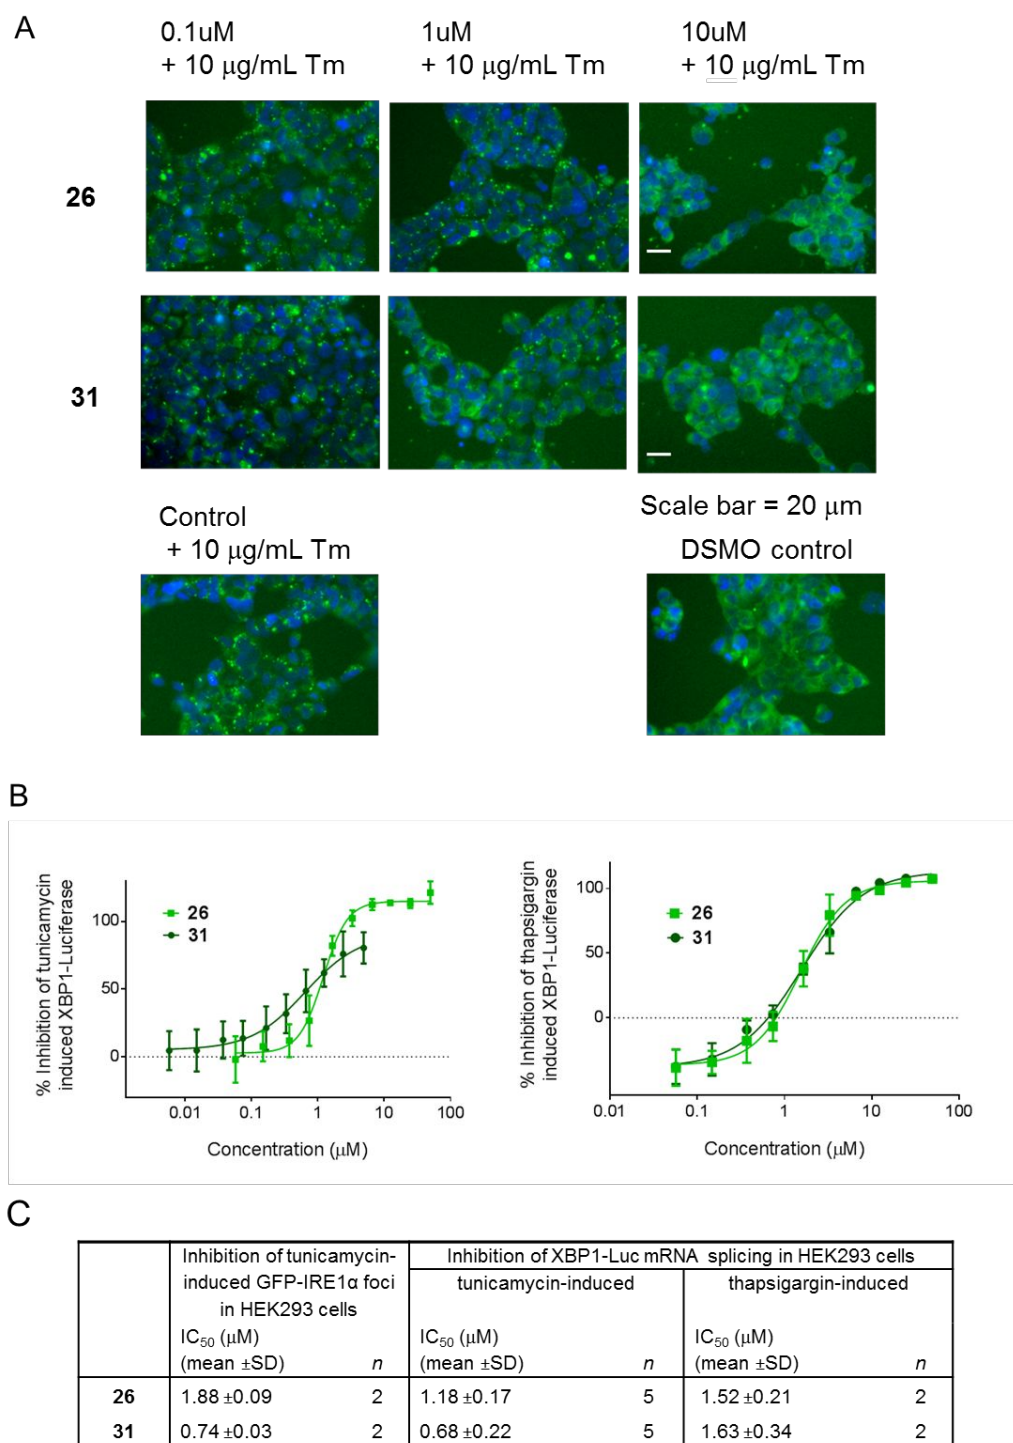

**Supplementary Figure 6:** Compounds **26** and **31** inhibit IRE1 $\alpha$  oligomerisation and RNase activity in HEK293 cells. **(A)** Inhibition of tunicamycin-induced oligomerization of GFP-IRE1 $\alpha$  in HEK293 cells. Representative microscopic images from compound dilution series used to quantify IRE1 $\alpha$  foci formation. **(B)** Inhibition of tunicamycin- and thapsigargin-induced splicing of XBP1-Luc reporter mRNA in HEK293 cells. **(C)** Summary of inhibition of IRE1 $\alpha$  oligomerization and RNA splicing activity in HEK293 cells.

## 7. Supplementary Figure S7

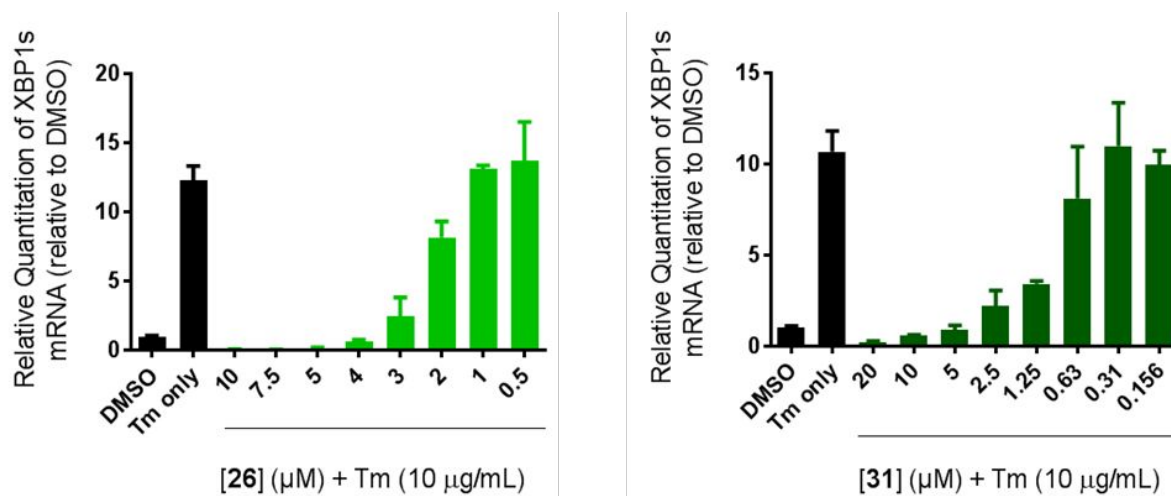

**Supplementary Figure S7:** Compounds **26** and **31** inhibit IRE1 $\alpha$ -dependent XBP1s mRNA expression in H929 cells. Inhibition of tunicamycin-induced XBP1s mRNA expression as measured by RT-qPCR. Data shown for a single experiment representative of n=3.

## 8. Supplementary Figure S8

**A****Compound 31**pS724 IRE1 $\alpha$ 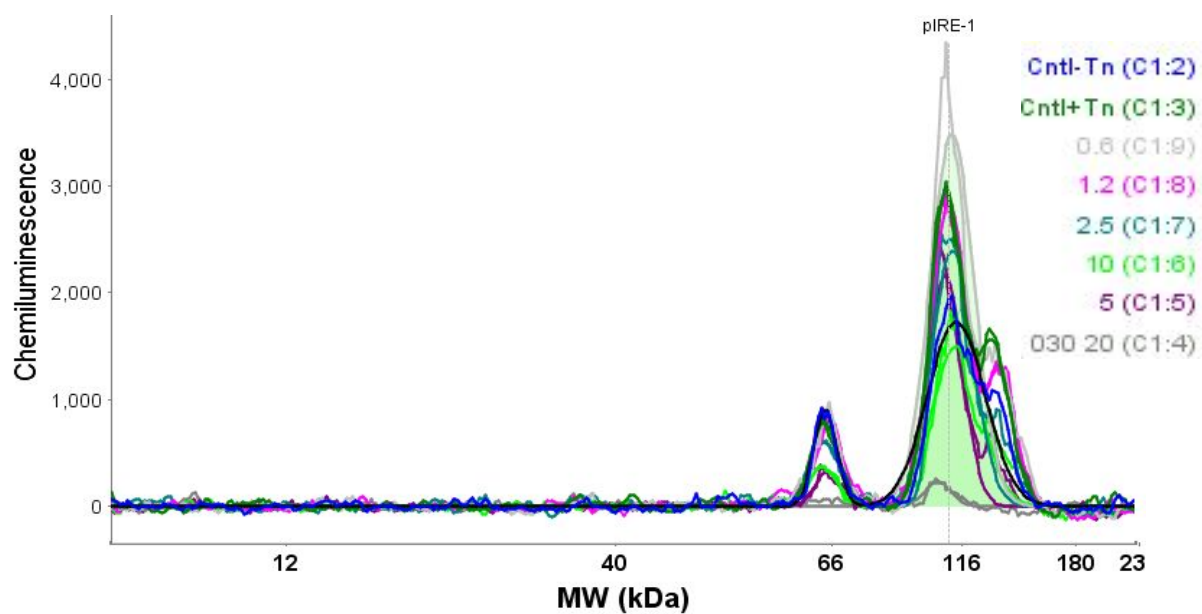Total IRE1 $\alpha$ 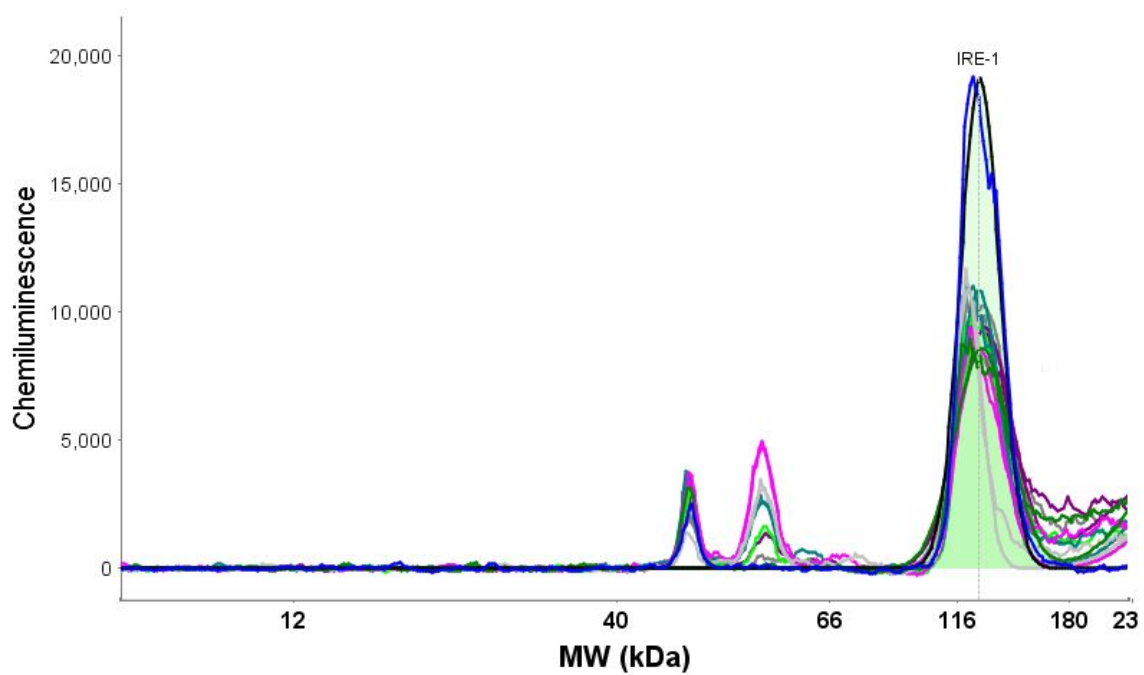

**B****Compound 26**pS724 IRE1 $\alpha$ 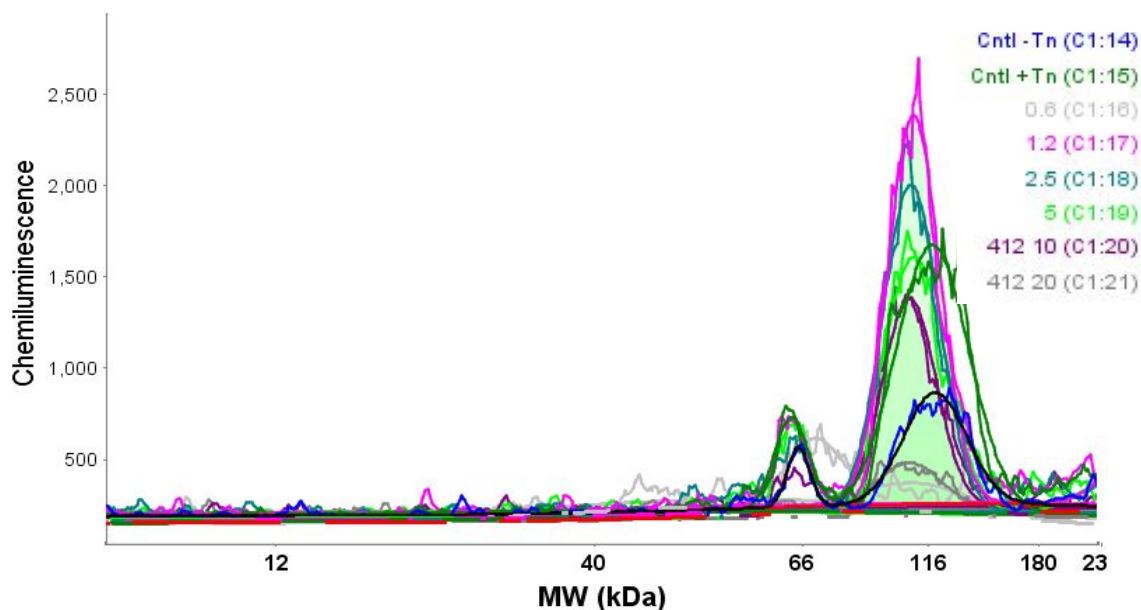Total IRE1 $\alpha$ 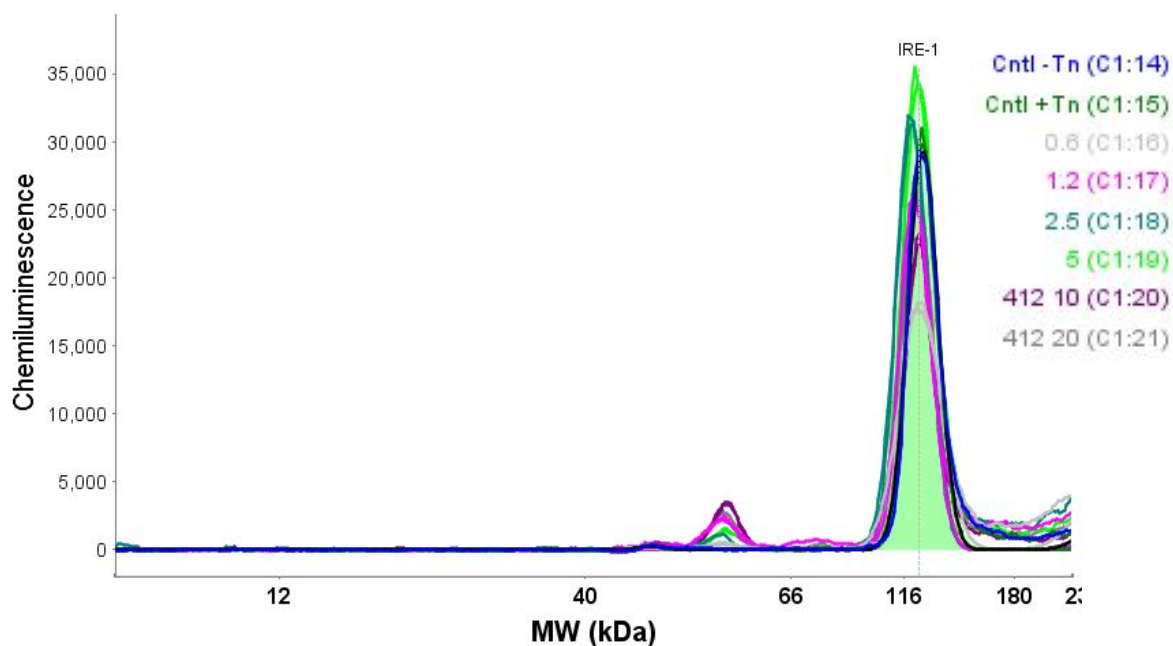

**Supplementary Figure S8:** Compounds (A) 31 and (B) 26 dose-dependently inhibit tunicamycin-induced expression of pS724 IRE1 $\alpha$  in H929 cells. Quantification of pS724 IRE1 $\alpha$  using capillary electrophoresis immunoassay relative to total IRE1 $\alpha$  (Simple Western™).

## 9. Supplementary Figure S9

**A**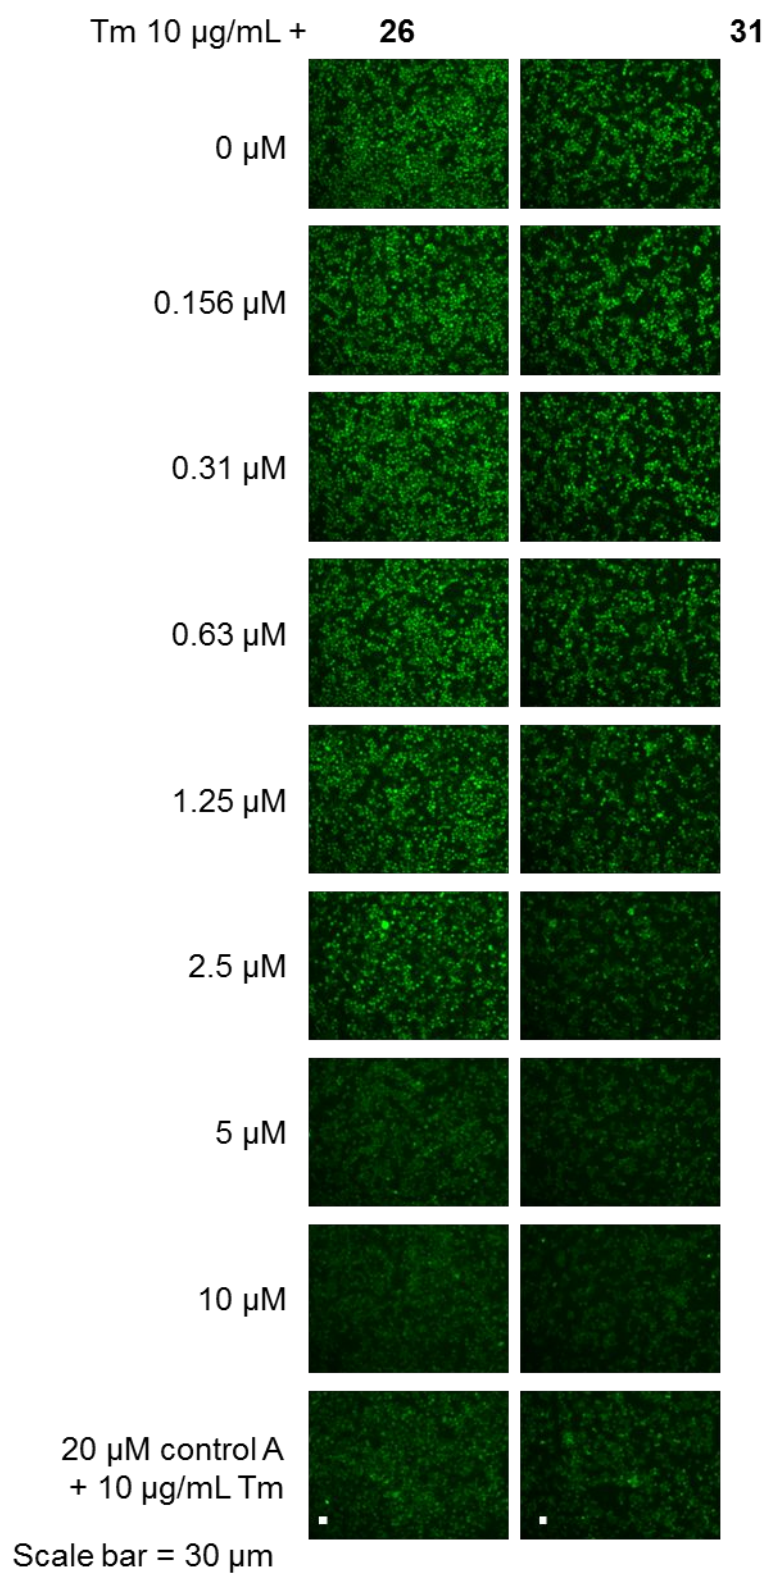

**B**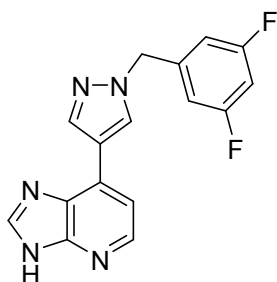

|                                          |                                          |
|------------------------------------------|------------------------------------------|
| IRE1 $\alpha$ autophosphorylation DELFIA | IC <sub>50</sub> = 3111 ( $\pm$ 1821) nM |
| IRE1a ATP-site binding assay             | IC <sub>50</sub> = 3276 ( $\pm$ 320) nM  |
| XBP1 reporter cleavage in HEK293TN       | IC <sub>50</sub> = 6203 ( $\pm$ 1683) nM |
| HEK293 cytotoxicity (CellTitreBlue)      | IC <sub>50</sub> > 50 000 nM             |

7-(1-(3,5-difluorobenzyl)-  
1*H*-pyrazol-4-yl)-3*H*-  
imidazo[4,5-*b*]pyridine

**Supplementary Figure S9: A)** Compounds **26** and **31** dose-dependently inhibit tunicamycin-induced expression of XBP1s in NCI-H929 cells. Representative microscopic images from compound dilution series. Quantification of XBP1s expression by immunofluorescence; **B)** Structure and activities of 7-(1-(3,5-difluorobenzyl)-1*H*-pyrazol-4-yl)-3*H*-imidazo[4,5-*b*]pyridine (Control A) used at high concentration (20-50  $\mu$ M) as a normalization control for quantifying inhibition of XBP1s protein expression in NCI-H929 cells or inhibition of cleavage of an XBP1-luciferase fusion mRNA reporter expressed in HEK293TN cells.



## 10. Supplementary Figure S10: In vitro autophosphorylation, ATP-site binding and RNase assay titrations for compounds **2**, **26** and **31**.

**A**IRE1 $\alpha$  DELFIA titrations, Compound **2**, n=8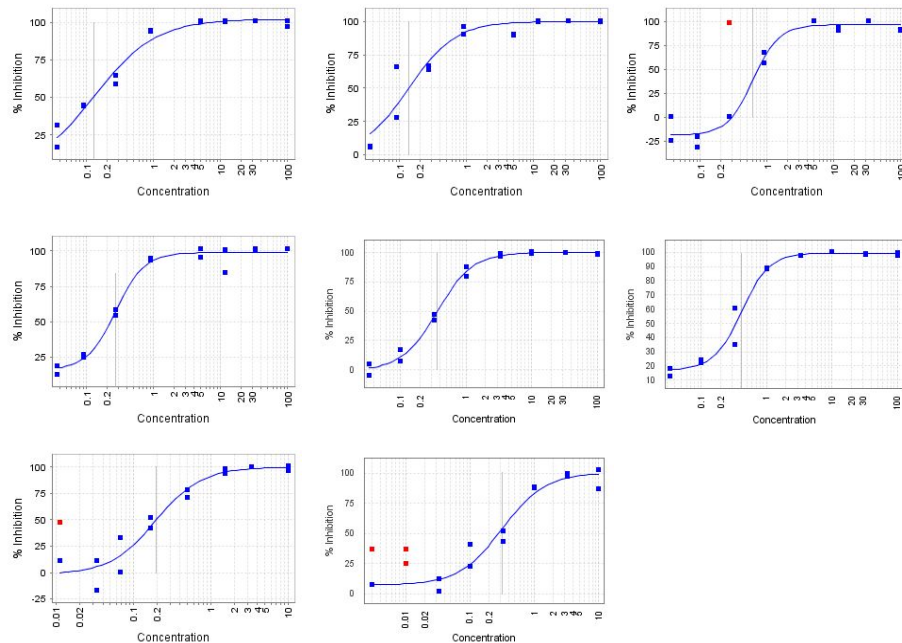IRE1 $\alpha$  DELFIA titrations, Compound **26**, n=3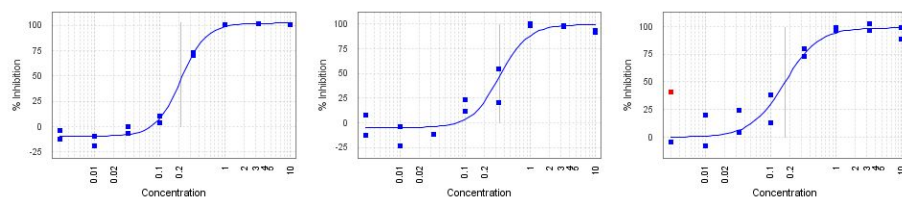IRE1 $\alpha$  DELFIA titrations, Compound **31**, n=8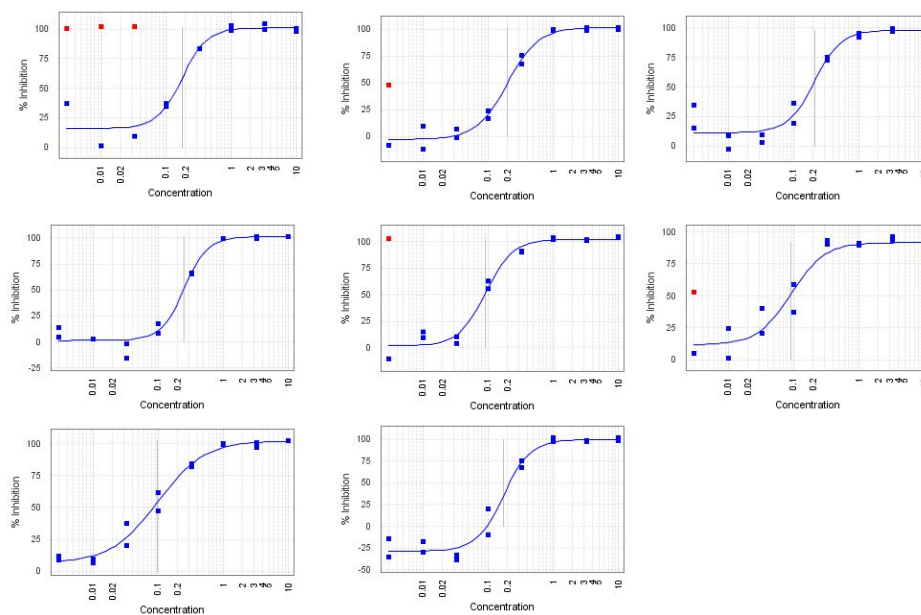



**B**IRE1 $\alpha$  LanthaScreen titrations, Compound **2**, n=13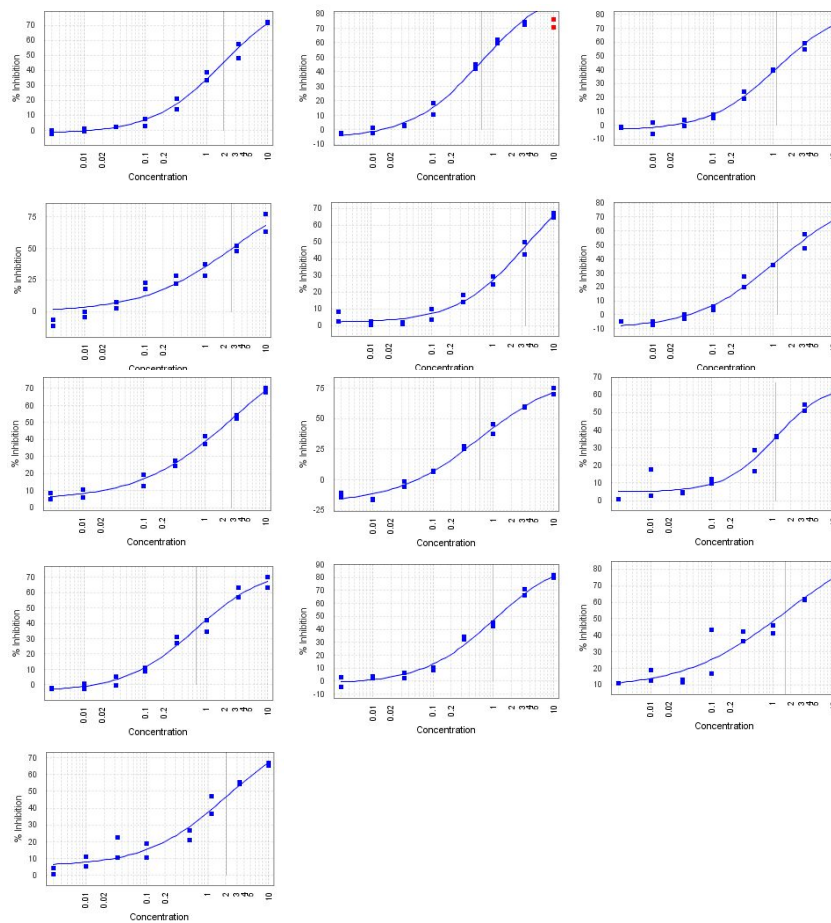IRE1 $\alpha$  LanthaScreen titrations, Compound **26**, n=5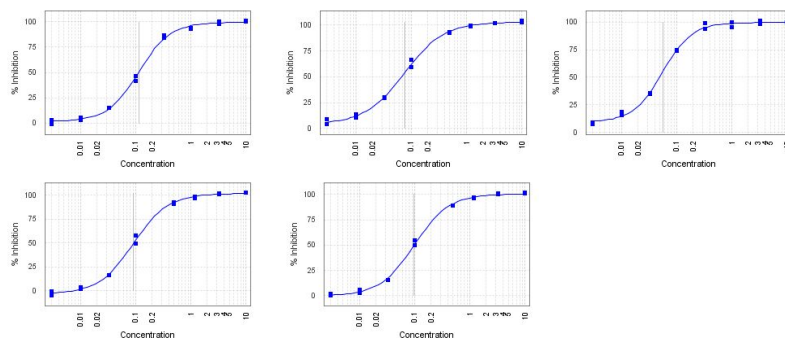IRE1 $\alpha$  LanthaScreen titrations, Compound **31**, n=3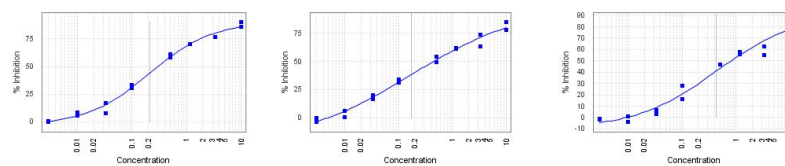

C

IRE1 $\alpha$  RNase FRET derepression titrations, Compound **2**, n=2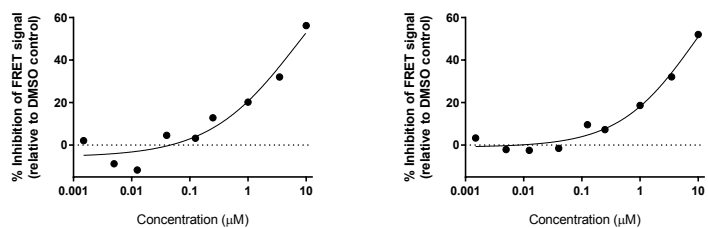

D

IRE1 $\alpha$  RNase FRET derepression titrations, Compound **26**, n=13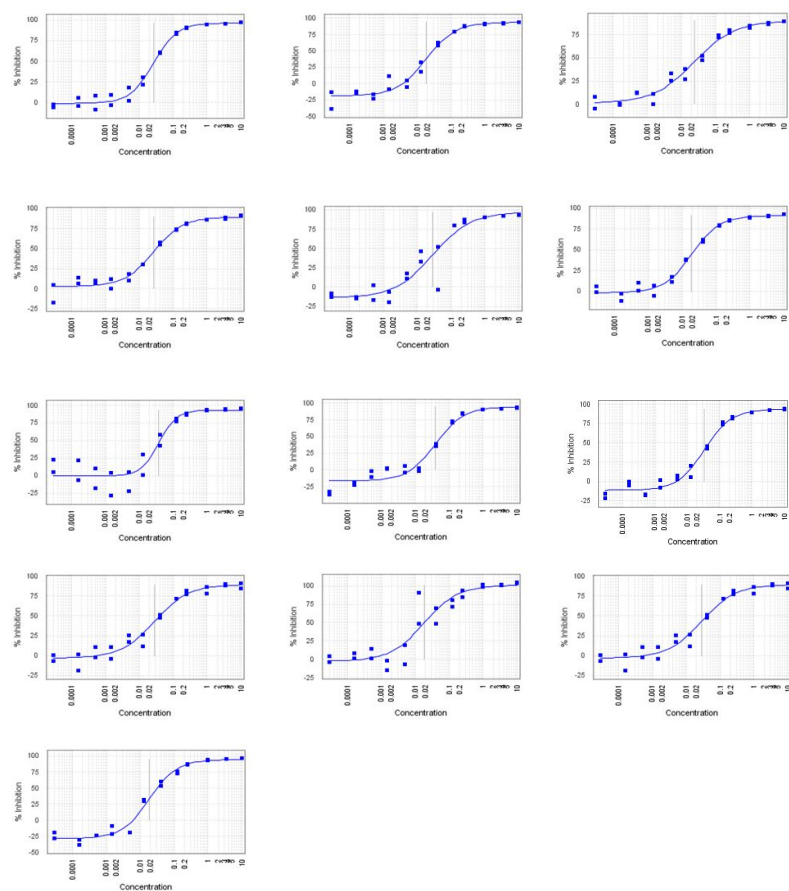IRE1 $\alpha$  RNase FRET derepression titrations, Compound **31**, n=6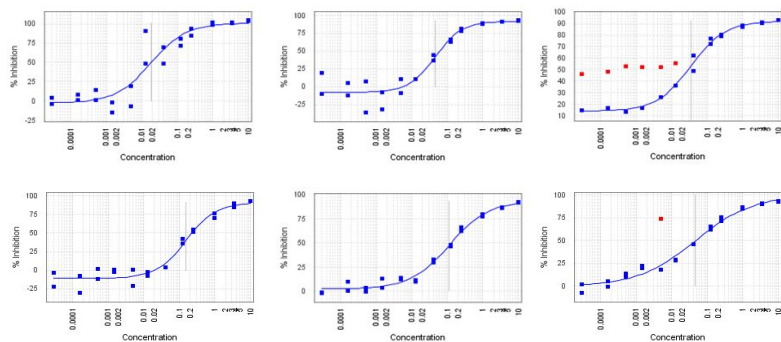

**Supplementary Figure S10: A)** IRE1 $\alpha$  in vitro autophosphorylation assay (DELFI) titrations for compounds **2**, **26** and **31**. Individual determinations with technical duplicates. Red squares indicate duplicate points excluded from the assay curve analysis. **B)** IRE1 $\alpha$  in vitro ATP-site binding assay (LanthaScreen) titrations for compounds **2**, **26** and **31**. Individual determinations with technical duplicates. Red squares indicate duplicate points excluded from the assay curve analysis. **C)** IRE1 $\alpha$  in vitro RNase assay (FRET derepression) titrations for compound **2**. Individual determinations in singlicate. **D)** IRE1 $\alpha$  in vitro RNase assay (FRET derepression) titrations for compounds **26** and **31**. Individual determinations with technical duplicates. Red squares indicate duplicate points excluded from the assay curve analysis.

11. **Supplementary Table S1:** Selectivity profile of compounds **2**, **26** and **31** tested against 455 human kinases at 1000 nM.

| Kinase <sup>b</sup>           | % control activity remaining at a test concentration of 1000 nM <sup>a</sup> |     |     |
|-------------------------------|------------------------------------------------------------------------------|-----|-----|
|                               | 2                                                                            | 26  | 31  |
| AAK1                          | 39                                                                           | 28  | 100 |
| ABL1(E255K)-phosphorylated    | 100                                                                          | 56  | 86  |
| ABL1(F317I)-nonphosphorylated | 71                                                                           | 28  | 63  |
| ABL1(F317I)-phosphorylated    | 93                                                                           | 8.1 | 76  |
| ABL1(F317L)-nonphosphorylated | 68                                                                           | 26  | 76  |
| ABL1(F317L)-phosphorylated    | 60                                                                           | 6.2 | 73  |
| ABL1(H396P)-nonphosphorylated | 74                                                                           | 16  | 42  |
| ABL1(H396P)-phosphorylated    | 73                                                                           | 46  | 67  |
| ABL1(M351T)-phosphorylated    | 91                                                                           | 57  | 78  |
| ABL1(Q252H)-nonphosphorylated | 93                                                                           | 48  | 64  |
| ABL1(Q252H)-phosphorylated    | 78                                                                           | 46  | 79  |
| ABL1(T315I)-nonphosphorylated | 76                                                                           | 38  | 71  |
| ABL1(T315I)-phosphorylated    | 94                                                                           | 50  | 87  |
| ABL1(Y253F)-phosphorylated    | 71                                                                           | 55  | 75  |
| ABL1-nonphosphorylated        | 76                                                                           | 44  | 58  |
| ABL1-phosphorylated           | 94                                                                           | 54  | 81  |
| ABL2                          | 100                                                                          | 56  | 92  |
| ACVR1                         | 90                                                                           | 95  | 99  |
| ACVR1B                        | 89                                                                           | 91  | 100 |
| ACVR2A                        | 100                                                                          | 100 | 97  |
| ACVR2B                        | 100                                                                          | 99  | 100 |
| ACVRL1                        | 98                                                                           | 100 | 100 |
| ADCK3                         | 79                                                                           | 88  | 85  |
| ADCK4                         | 93                                                                           | 84  | 77  |
| AKT1                          | 98                                                                           | 100 | 100 |
| AKT2                          | 99                                                                           | 99  | 80  |
| AKT3                          | 100                                                                          | 100 | 90  |
| ALK                           | 92                                                                           | 94  | 70  |
| ALK(C1156Y)                   | 88                                                                           | 64  | 91  |
| ALK(L1196M)                   | 77                                                                           | 90  | 94  |
| AMPK-alpha1                   | 96                                                                           | 85  | 94  |
| AMPK-alpha2                   | 94                                                                           | 92  | 99  |
| ANKK1                         | 75                                                                           | 48  | 100 |
| ARK5                          | 99                                                                           | 100 | 100 |
| ASK1                          | 70                                                                           | 100 | 100 |
| ASK2                          | 83                                                                           | 96  | 100 |
| AURKA                         | 90                                                                           | 98  | 75  |
| AURKB                         | 90                                                                           | 55  | 83  |
| AURKC                         | 92                                                                           | 58  | 92  |
| AXL                           | 84                                                                           | 88  | 99  |

|               |      |     |     |
|---------------|------|-----|-----|
| BIKE          | 34   | 13  | 91  |
| BLK           | 53   | 95  | 79  |
| BMPR1A        | 95   | 86  | 100 |
| BMPR1B        | 100  | 100 | 67  |
| BMPR2         | 96   | 100 | 91  |
| BMX           | 96   | 92  | 100 |
| BRAF          | 98   | 98  | 96  |
| BRAF(V600E)   | 99   | 89  | 98  |
| BRK           | 87   | 85  | 93  |
| BRSK1         | 96   | 86  | 100 |
| BRSK2         | 100  | 98  | 84  |
| BTK           | 98   | 100 | 70  |
| BUB1          | 83   | 58  | 59  |
| CAMK1         | 100  | 77  | 84  |
| CAMK1B        | n.d. | 75  | 100 |
| CAMK1D        | 100  | 71  | 85  |
| CAMK1G        | 76   | 51  | 100 |
| CAMK2A        | 100  | 47  | 99  |
| CAMK2B        | 90   | 69  | 100 |
| CAMK2D        | 97   | 62  | 100 |
| CAMK2G        | 100  | 52  | 100 |
| CAMK4         | 100  | 100 | 100 |
| CAMKK1        | 94   | 52  | 98  |
| CAMKK2        | 99   | 42  | 100 |
| CASK          | 87   | 59  | 100 |
| CDC2L1        | 100  | 100 | 92  |
| CDC2L2        | 100  | 99  | 90  |
| CDC2L5        | 92   | 84  | 96  |
| CDK11         | 97   | 98  | 91  |
| CDK2          | 88   | 95  | 98  |
| CDK3          | 95   | 90  | 97  |
| CDK4          | n.d. | 100 | 100 |
| CDK4-cyclinD1 | 88   | 93  | 87  |
| CDK4-cyclinD3 | 78   | 100 | 97  |
| CDK5          | 100  | 92  | 99  |
| CDK7          | 68   | 16  | 61  |
| CDK8          | 82   | 97  | 70  |
| CDK9          | 98   | 43  | 95  |
| CDKL1         | 74   | 90  | 67  |
| CDKL2         | 83   | 88  | 81  |
| CDKL3         | 100  | 88  | 90  |
| CDKL5         | 100  | 46  | 96  |
| CHEK1         | 88   | 100 | 100 |
| CHEK2         | 88   | 61  | 100 |
| CIT           | 73   | 74  | 85  |
| CLK1          | 4    | 1.2 | 16  |
| CLK2          | 9.6  | 4.2 | 79  |
| CLK3          | 70   | 52  | 100 |

|                           |     |      |     |
|---------------------------|-----|------|-----|
| CLK4                      | 1.5 | 2.1  | 20  |
| CSF1R                     | 79  | 21   | 60  |
| CSF1R-autoinhibited       | 98  | 91   | 100 |
| CSK                       | 100 | 94   | 98  |
| CSNK1A1                   | 100 | 58   | 97  |
| CSNK1A1L                  | 100 | 88   | 100 |
| CSNK1D                    | 64  | 61   | 100 |
| CSNK1E                    | 71  | 44   | 100 |
| CSNK1G1                   | 100 | 95   | 100 |
| CSNK1G2                   | 100 | 95   | 96  |
| CSNK1G3                   | 100 | 100  | 100 |
| CSNK2A1                   | 85  | 75   | 99  |
| CSNK2A2                   | 94  | 100  | 100 |
| CTK                       | 91  | 95   | 69  |
| DAPK1                     | 98  | 66   | 99  |
| DAPK2                     | 91  | 69   | 98  |
| DAPK3                     | 85  | 34   | 84  |
| DCAMKL1                   | 99  | 100  | 81  |
| DCAMKL2                   | 95  | 92   | 96  |
| DCAMKL3                   | 100 | 100  | 100 |
| DDR1                      | 22  | 100  | 96  |
| DDR2                      | 86  | 98   | 100 |
| DLK                       | 89  | 83   | 100 |
| DMPK                      | 84  | 99   | 89  |
| DMPK2                     | 62  | 81   | 100 |
| DRAK1                     | 18  | 20   | 91  |
| DRAK2                     | 93  | 61   | 92  |
| DYRK1A                    | 5.1 | 0.35 | 71  |
| DYRK1B                    | 1   | 0.85 | 63  |
| DYRK2                     | 28  | 8    | 99  |
| EGFR                      | 71  | 80   | 100 |
| EGFR(E746-A750del)        | 84  | 91   | 100 |
| EGFR(G719C)               | 91  | 93   | 71  |
| EGFR(G719S)               | 85  | 97   | 71  |
| EGFR(L747-E749del, A750P) | 87  | 83   | 81  |
| EGFR(L747-S752del, P753S) | 89  | 81   | 100 |
| EGFR(L747-T751del,Sins)   | 88  | 96   | 92  |
| EGFR(L858R)               | 68  | 83   | 100 |
| EGFR(L858R,T790M)         | 82  | 90   | 100 |
| EGFR(L861Q)               | 82  | 100  | 100 |
| EGFR(S752-I759del)        | 94  | 95   | 97  |
| EGFR(T790M)               | 92  | 100  | 100 |
| EIF2AK1                   | 100 | 78   | 78  |
| EPHA1                     | 80  | 84   | 99  |
| EPHA2                     | 94  | 99   | 94  |
| EPHA3                     | 78  | 88   | 100 |
| EPHA4                     | 84  | 99   | 100 |
| EPHA5                     | 99  | 93   | 99  |

|                       |                   |      |     |
|-----------------------|-------------------|------|-----|
| EPHA6                 | 79                | 93   | 82  |
| EPHA7                 | 94                | 97   | 94  |
| EPHA8                 | 90                | 90   | 92  |
| EPHB1                 | 100               | 89   | 84  |
| EPHB2                 | 83                | 94   | 96  |
| EPHB3                 | 82                | 88   | 92  |
| EPHB4                 | 79                | 95   | 100 |
| EPHB6                 | 68                | 89   | 83  |
| ERBB2                 | 100               | 97   | 84  |
| ERBB3                 | 96                | 99   | 71  |
| ERBB4                 | 99                | 100  | 100 |
| ERK1                  | 95                | 100  | 92  |
| ERK2                  | 92                | 93   | 99  |
| ERK3                  | 96                | 68   | 94  |
| ERK4                  | 100               | 99   | 93  |
| ERK5                  | 100               | 98   | 87  |
| ERK8                  | 87                | 81   | 100 |
| ERN1                  | 69                | 41   | 33  |
| FAK                   | 91                | 100  | 97  |
| FER                   | 98                | 100  | 82  |
| FES                   | 87                | 88   | 96  |
| FGFR1                 | 99                | 94   | 87  |
| FGFR2                 | 85                | 91   | 84  |
| FGFR3                 | 90                | 94   | 91  |
| FGFR3(G697C)          | 78                | 85   | 91  |
| FGFR4                 | 94                | 99   | 98  |
| FGR                   | 75                | 93   | 100 |
| FLT1                  | 90                | 11   | 45  |
| FLT3                  | 2.5               | 3    | 83  |
| FLT3(D835H)           | 13                | 5.5  | 90  |
| FLT3(D835V)           | n.d.              | 0    | 69  |
| FLT3(D835Y)           | 10                | 17   | 100 |
| FLT3(ITD)             | 5.6               | 0.25 | 91  |
| FLT3(ITD,D835V)       | n.d. <sup>a</sup> | 0.7  | 76  |
| FLT3(ITD,D835Y)       | n.d.              | 25   | 77  |
| FLT3(K663Q)           | 3.8               | 13   | 83  |
| FLT3(N841I)           | 7.5               | 0    | 96  |
| FLT3(R834Q)           | 94                | 0.7  | 100 |
| FLT3-autoinhibited    | 42                | 0.65 | 90  |
| FLT4                  | 95                | 83   | 100 |
| FRK                   | 90                | 96   | 92  |
| FYN                   | 95                | 96   | 98  |
| GAK                   | 8.8               | 10   | 33  |
| GCN2(Kin.Dom.2,S808G) | 93                | 97   | 77  |
| GRK1                  | 100               | 80   | 82  |
| GRK2                  | n.d.              | 84   | 100 |
| GRK3                  | n.d.              | 74   | 91  |
| GRK4                  | 42                | 79   | 100 |

|                              |      |      |     |
|------------------------------|------|------|-----|
| GRK7                         | 97   | 63   | 77  |
| GSK3A                        | 93   | 100  | 84  |
| GSK3B                        | 99   | 92   | 96  |
| HASPIN                       | 21   | 22   | 66  |
| HCK                          | 80   | 93   | 87  |
| HIPK1                        | 42   | 0.45 | 74  |
| HIPK2                        | 62   | 0.7  | 85  |
| HIPK3                        | 63   | 2.4  | 89  |
| HIPK4                        | 8.6  | 5.1  | 71  |
| HPK1                         | 75   | 88   | 97  |
| HUNK                         | 90   | 100  | 92  |
| ICK                          | 80   | 74   | 97  |
| IGF1R                        | 100  | 100  | 95  |
| IKK-alpha                    | 76   | 100  | 90  |
| IKK-beta                     | 83   | 94   | 90  |
| IKK-epsilon                  | 94   | 100  | 78  |
| INSR                         | 99   | 91   | 97  |
| INSRR                        | 96   | 85   | 100 |
| IRAK1                        | 95   | 45   | 89  |
| IRAK3                        | 100  | 49   | 95  |
| IRAK4                        | 92   | 85   | 91  |
| ITK                          | 92   | 84   | 91  |
| JAK1(JH1domain-catalytic)    | 100  | 100  | 100 |
| JAK1(JH2domain-pseudokinase) | 93   | 100  | 82  |
| JAK2(JH1domain-catalytic)    | 91   | 99   | 100 |
| JAK3(JH1domain-catalytic)    | 100  | 100  | 82  |
| JNK1                         | 91   | 83   | 67  |
| JNK2                         | 91   | 80   | 75  |
| JNK3                         | 89   | 79   | 99  |
| KIT                          | 1.6  | 0    | 68  |
| KIT(A829P)                   | 75   | 45   | 94  |
| KIT(D816H)                   | 100  | 63   | 96  |
| KIT(D816V)                   | 78   | 29   | 81  |
| KIT(L576P)                   | 1.2  | 0    | 61  |
| KIT(V559D)                   | 0.45 | 0.05 | 67  |
| KIT(V559D,T670I)             | 20   | 0.85 | 97  |
| KIT(V559D,V654A)             | 7.8  | 0.7  | 27  |
| KIT-autoinhibited            | 82   | 34   | 98  |
| LATS1                        | 82   | 82   | 86  |
| LATS2                        | 58   | 73   | 94  |
| LCK                          | 100  | 87   | 82  |
| LIMK1                        | 100  | 97   | 98  |
| LIMK2                        | 94   | 85   | 100 |
| LKB1                         | 52   | 98   | 77  |
| LOK                          | 100  | 100  | 91  |
| LRRK2                        | 94   | 90   | 100 |
| LRRK2(G2019S)                | 91   | 76   | 88  |
| LTK                          | 100  | 88   | 88  |



|             |     |     |     |
|-------------|-----|-----|-----|
| LYN         | 92  | 96  | 95  |
| LZK         | 100 | 100 | 98  |
| MAK         | 82  | 61  | 69  |
| MAP3K1      | 99  | 92  | 89  |
| MAP3K15     | 83  | 98  | 100 |
| MAP3K2      | 74  | 100 | 62  |
| MAP3K3      | 88  | 89  | 73  |
| MAP3K4      | 74  | 86  | 86  |
| MAP4K2      | 99  | 76  | 85  |
| MAP4K3      | 71  | 92  | 99  |
| MAP4K4      | 92  | 75  | 100 |
| MAP4K5      | 98  | 87  | 100 |
| MAPKAPK2    | 92  | 100 | 100 |
| MAPKAPK5    | 91  | 98  | 82  |
| MARK1       | 86  | 94  | 94  |
| MARK2       | 96  | 88  | 100 |
| MARK3       | 100 | 99  | 60  |
| MARK4       | 92  | 95  | 93  |
| MAST1       | 91  | 73  | 63  |
| MEK1        | 95  | 93  | 80  |
| MEK2        | 92  | 89  | 80  |
| MEK3        | 87  | 100 | 88  |
| MEK4        | 75  | 100 | 100 |
| MEK5        | 85  | 95  | 71  |
| MEK6        | 98  | 93  | 929 |
| MELK        | 35  | 16  | 96  |
| MERTK       | 100 | 70  | 82  |
| MET         | 90  | 100 | 97  |
| MET(M1250T) | 89  | 82  | 98  |
| MET(Y1235D) | 100 | 97  | 99  |
| MINK        | 72  | 57  | 87  |
| MKK7        | 92  | 100 | 93  |
| MKNK1       | 82  | 88  | 83  |
| MKNK2       | 80  | 67  | 74  |
| MLCK        | 80  | 6.6 | 89  |
| MLK1        | 85  | 100 | 93  |
| MLK2        | 100 | 92  | 88  |
| MLK3        | 100 | 100 | 81  |
| MRCKA       | 90  | 82  | 97  |
| MRCKB       | 64  | 97  | 100 |
| MST1        | 100 | 100 | 95  |
| MST1R       | 99  | 64  | 77  |
| MST2        | 85  | 92  | 100 |
| MST3        | 100 | 91  | 92  |
| MST4        | 88  | 84  | 100 |
| MTOR        | 98  | 100 | 89  |
| MUSK        | 72  | 42  | 40  |
| MYLK        | 79  | 42  | 81  |

|                |     |      |     |
|----------------|-----|------|-----|
| MYLK2          | 82  | 52   | 89  |
| MYLK4          | 67  | 24   | 91  |
| MYO3A          | 96  | 96   | 97  |
| MYO3B          | 82  | 92   | 73  |
| NDR1           | 75  | 96   | 86  |
| NDR2           | 94  | 94   | 100 |
| NEK1           | 84  | 92   | 96  |
| NEK10          | 92  | 72   | 100 |
| NEK11          | 88  | 100  | 92  |
| NEK2           | 100 | 92   | 92  |
| NEK3           | 93  | 88   | 100 |
| NEK4           | 99  | 100  | 95  |
| NEK5           | 93  | 86   | 96  |
| NEK6           | 99  | 100  | 96  |
| NEK7           | 97  | 99   | 94  |
| NEK9           | 100 | 91   | 100 |
| NIK            | 90  | 78   | 92  |
| NIM1           | 97  | 91   | 77  |
| NLK            | 70  | 100  | 100 |
| OSR1           | 79  | 99   | 100 |
| p38-alpha      | 100 | 99   | 95  |
| p38-beta       | 94  | 94   | 99  |
| p38-delta      | 89  | 60   | 72  |
| p38-gamma      | 73  | 91   | 83  |
| PAK1           | 98  | 99   | 89  |
| PAK2           | 71  | 76   | 91  |
| PAK3           | 63  | 81   | 100 |
| PAK4           | 79  | 93   | 86  |
| PAK6           | 100 | 98   | 97  |
| PAK7           | 98  | 93   | 95  |
| PCK1           | 97  | 87   | 37  |
| PCK2           | 98  | 66   | 2.7 |
| PCK3           | 79  | 80   | 88  |
| PDGFRA         | 12  | 0.3  | 94  |
| PDGFRB         | 1.3 | 0.05 | 56  |
| PDPK1          | 88  | 100  | 100 |
| PFTAIRE2       | 100 | 40   | 91  |
| PFTK1          | 87  | 99   | 96  |
| PHKG1          | 91  | 17   | 92  |
| PHKG2          | 85  | 29   | 98  |
| PIK3C2B        | 86  | 97   | 100 |
| PIK3C2G        | 91  | 80   | 82  |
| PIK3CA         | 72  | 97   | 90  |
| PIK3CA(C420R)  | 88  | 89   | 85  |
| PIK3CA(E542K)  | 72  | 93   | 65  |
| PIK3CA(E545A)  | 88  | 100  | 78  |
| PIK3CA(E545K)  | 75  | 80   | 68  |
| PIK3CA(H1047L) | 95  | 98   | 70  |

|                |      |     |     |
|----------------|------|-----|-----|
| PIK3CA(H1047Y) | 89   | 82  | 100 |
| PIK3CA(I800L)  | 83   | 88  | 58  |
| PIK3CA(M1043I) | 59   | 81  | 78  |
| PIK3CA(Q546K)  | 88   | 100 | 81  |
| PIK3CB         | 82   | 93  | 97  |
| PIK3CD         | 92   | 90  | 75  |
| PIK3CG         | 78   | 100 | 100 |
| PIK4CB         | 3.3  | 21  | 73  |
| PKFYVE         | n.d. | 87  | 26  |
| PIM1           | 100  | 68  | 95  |
| PIM2           | 100  | 100 | 100 |
| PIM3           | 95   | 71  | 92  |
| PIP5K1A        | 100  | 80  | 91  |
| PIP5K1C        | 85   | 91  | 84  |
| PIP5K2B        | 78   | 87  | 81  |
| PIP5K2C        | 67   | 93  | 100 |
| PKAC-alpha     | 68   | 100 | 94  |
| PKAC-beta      | 86   | 99  | 90  |
| PKMYT1         | 81   | 94  | 100 |
| PKN1           | 100  | 71  | 91  |
| PKN2           | 100  | 100 | 98  |
| PLK1           | 97   | 90  | 96  |
| PLK2           | 66   | 100 | 90  |
| PLK3           | 90   | 89  | 90  |
| PLK4           | 87   | 100 | 99  |
| PRKCD          | 93   | 90  | 62  |
| PRKCE          | 100  | 96  | 86  |
| PRKCH          | 96   | 100 | 100 |
| PRKCI          | 88   | 100 | 89  |
| PRKCQ          | 94   | 85  | 100 |
| PRKD1          | 100  | 98  | 99  |
| PRKD2          | 100  | 100 | 93  |
| PRKD3          | 98   | 94  | 100 |
| PRKG1          | 84   | 32  | 83  |
| PRKG2          | 84   | 64  | 64  |
| PRKR           | 97   | 97  | 81  |
| PRKX           | 91   | 80  | 100 |
| PRP4           | 60   | 97  | 93  |
| PYK2           | 84   | 86  | 99  |
| QSK            | 78   | 82  | 100 |
| RAF1           | 99   | 100 | 100 |
| RET            | 100  | 100 | 96  |
| RET(M918T)     | 100  | 92  | 80  |
| RET(V804L)     | 100  | 88  | 92  |
| RET(V804M)     | 97   | 82  | 100 |
| RIOK1          | 35   | 33  | 88  |
| RIOK2          | 70   | 67  | 61  |
| RIOK3          | 31   | 32  | 94  |

|                               |     |     |     |
|-------------------------------|-----|-----|-----|
| RIPK1                         | 91  | 74  | 94  |
| RIPK2                         | 88  | 61  | 100 |
| RIPK4                         | 96  | 95  | 98  |
| RIPK5                         | 98  | 91  | 79  |
| ROCK1                         | 36  | 22  | 76  |
| ROCK2                         | 31  | 21  | 100 |
| ROS1                          | 100 | 100 | 96  |
| RPS6KA4(Kin.Dom.1-N-terminal) | 100 | 99  | 91  |
| RPS6KA4(Kin.Dom.2-C-terminal) | 87  | 81  | 86  |
| RPS6KA5(Kin.Dom.1-N-terminal) | 100 | 99  | 100 |
| RPS6KA5(Kin.Dom.2-C-terminal) | 93  | 80  | 99  |
| RSK1(Kin.Dom.1-N-terminal)    | 72  | 54  | 100 |
| RSK1(Kin.Dom.2-C-terminal)    | 83  | 59  | 96  |
| RSK2(Kin.Dom.1-N-terminal)    | 37  | 19  | 100 |
| RSK2(Kin.Dom.2-C-terminal)    | 89  | 100 | 73  |
| RSK3(Kin.Dom.1-N-terminal)    | 82  | 52  | 78  |
| RSK3(Kin.Dom.2-C-terminal)    | 100 | 94  | 80  |
| RSK4(Kin.Dom.1-N-terminal)    | 27  | 13  | 97  |
| RSK4(Kin.Dom.2-C-terminal)    | 92  | 56  | 88  |
| S6K1                          | 90  | 88  | 95  |
| SBK1                          | 87  | 89  | 77  |
| SGK                           | 91  | 94  | 76  |
| SgK110                        | 100 | 100 | 100 |
| SGK2                          | 89  | 100 | 83  |
| SGK3                          | 91  | 65  | 93  |
| SIK                           | 98  | 89  | 91  |
| SIK2                          | 73  | 97  | 100 |
| SLK                           | 100 | 98  | 80  |
| SNARK                         | 99  | 73  | 88  |
| SNRK                          | 99  | 100 | 79  |
| SRC                           | 100 | 100 | 100 |
| SRMS                          | 91  | 86  | 95  |
| SRPK1                         | 100 | 79  | 84  |
| SRPK2                         | 73  | 79  | 93  |
| SRPK3                         | 49  | 66  | 100 |
| STK16                         | 100 | 83  | 96  |
| STK33                         | 47  | 25  | 100 |
| STK35                         | 77  | 97  | 100 |
| STK36                         | 91  | 95  | 93  |
| STK39                         | 88  | 89  | 98  |
| SYK                           | 97  | 100 | 92  |
| TAK1                          | 91  | 47  | 65  |
| TAOK1                         | 93  | 85  | 75  |
| TAOK2                         | 87  | 100 | 98  |
| TAOK3                         | 92  | 91  | 77  |
| TBK1                          | 71  | 90  | 76  |
| TEC                           | 100 | 97  | 88  |
| TESK1                         | 92  | 91  | 100 |

|                              |      |     |     |
|------------------------------|------|-----|-----|
| TGFBR1                       | 100  | 100 | 92  |
| TGFBR2                       | 100  | 100 | 100 |
| TIE1                         | 99   | 67  | 84  |
| TIE2                         | 78   | 89  | 91  |
| TLK1                         | 96   | 87  | 93  |
| TLK2                         | 98   | 95  | 89  |
| TNIK                         | 80   | 47  | 97  |
| TNK1                         | 69   | 100 | 100 |
| TNK2                         | 86   | 93  | 100 |
| TNNI3K                       | 97   | 100 | 100 |
| TRKA                         | 89   | 19  | 96  |
| TRKB                         | 89   | 69  | 91  |
| TRKC                         | 87   | 100 | 100 |
| TRPM6                        | 100  | 92  | 85  |
| TSSK1B                       | 100  | 92  | 88  |
| TSSK3                        | n.d. | 100 | 91  |
| TTK                          | 77   | 54  | 90  |
| TXK                          | 85   | 88  | 93  |
| TYK2(JH1domain-catalytic)    | 87   | 100 | 74  |
| TYK2(JH2domain-pseudokinase) | 91   | 99  | 73  |
| TYRO3                        | 69   | 86  | 99  |
| ULK1                         | 78   | 97  | 79  |
| ULK2                         | 98   | 94  | 83  |
| ULK3                         | 78   | 95  | 68  |
| VEGFR2                       | 79   | 35  | 71  |
| VRK2                         | 867  | 98  | 82  |
| VPS34                        | n.d. | 94  | 97  |
| WEE1                         | 100  | 100 | 100 |
| WEE2                         | 94   | 87  | 97  |
| WNK1                         | 89   | 100 | 76  |
| WNK2                         | n.d. | 34  | 100 |
| WNK3                         | 96   | 100 | 82  |
| WNK4                         | n.d. | 100 | 83  |
| YANK1                        | 95   | 98  | 73  |
| YANK2                        | 94   | 100 | 100 |
| YANK3                        | 100  | 99  | 73  |
| YES                          | 91   | 93  | 96  |
| YSK1                         | 92   | 100 | 99  |
| YSK4                         | 45   | 23  | 77  |
| ZAK                          | 86   | 87  | 93  |
| ZAP70                        | 84   | 100 | 83  |

<sup>a</sup> n.d. = not determined; <sup>b</sup> blue highlight = mutant kinase, pink highlight = wild type lipid kinase.

**12. Supplementary Table S2: HPLC purities of test compounds 2, 5 – 12, 19 – 33.**

| No.       | Purity <sup>a</sup> (%) | No.       | Purity <sup>a</sup> (%) | No.       | Purity <sup>a</sup> (%) |
|-----------|-------------------------|-----------|-------------------------|-----------|-------------------------|
| <b>2</b>  | 99.7                    | <b>12</b> | 99.2                    | <b>26</b> | 99.4                    |
| <b>5</b>  | 96.0                    | <b>19</b> | 98.3                    | <b>27</b> | 100.0                   |
| <b>6</b>  | 98.7                    | <b>20</b> | 100.0                   | <b>28</b> | 100.0                   |
| <b>7</b>  | 100.0                   | <b>21</b> | 100.0                   | <b>29</b> | 100.0                   |
| <b>8</b>  | 100.0                   | <b>22</b> | 100.0                   | <b>30</b> | 98.8                    |
| <b>9</b>  | 100.0                   | <b>23</b> | 100.0                   | <b>31</b> | 100.0                   |
| <b>10</b> | 100.0                   | <b>24</b> | 98.3                    | <b>32</b> | 100.0                   |
| <b>11</b> | 99.1                    | <b>25</b> | 97.7                    | <b>33</b> | 99.2                    |

<sup>a</sup> Determined by HPLC (AUC, UV-Vis) as described in the Experimental Methods.

### 13. Generation of an HEK293TN XBP1 luciferase reporter cell line

A lentiviral plasmid reporter for IRE1 $\alpha$  RNase activity was constructed from the FLAG-XBP1 $\Delta$ DBD coding region (nucleotides 410-633 of XBP1), which lacks the DNA binding domain but contains a 26 nucleotide intron cleaved by IRE1 $\alpha$  (obtained from Dr Chris Bakal, ICR), as a blunt/XbaI fragment. This was linked to the N-terminus of the PEST-destabilised firefly luciferase (luc2P) from pGL4.24 (E8421; Promega) as a blunt/BamHI fragment. These units were combined in the pCMV promoter vector pCDF1-MCS2-EF1-Puro (CD110B-1; System Biosciences), opened with XbaI/BamHI, in a three-fragment ligation giving the construct pCDF1-FLAG-XBP1 $\Delta$ DBD-luc2P. The luciferase domain was arranged to be in frame with the upstream XBP ORF only when the 26 nucleotide intron was spliced out by IRE1 $\alpha$  activity. Conversely, when IRE1 $\alpha$  is inactive or inhibited and the 26 nucleotide intron of XBP1 is present, the luciferase domain is out of frame resulting in a minimal luciferase signal.

HEK293TN (LV900A-1; System Biosciences) packaging cells were seeded in a 6 well plate at a density of  $5 \times 10^5$ /well in DMEM (41966; Life Technologies) supplemented with 10% foetal bovine serum (FBS) (F7524; Sigma-Aldrich) and incubated at 37°C/5% CO<sub>2</sub> overnight. The pPACKF1<sup>TM</sup> Packaging Plasmid mix (LV100A-1; System Biosciences) and lentiviral plasmid were pre-mixed in the presence of Opti-MEM<sup>®</sup> reduced serum medium (31985047; Life Technologies). The Arrest-In Transfection Reagent (ATR1740; Open Biosystems) was also pre-mixed in the presence of Opti-MEM<sup>®</sup>. The 2 mixtures were combined and incubated at r.t. for 20 min. The DMEM/10% FBS cell medium was replaced with Opti-MEM<sup>®</sup> and the

transfection mix added to the cells. The cells were subsequently incubated at 37°C/5% CO<sub>2</sub> for 6 h. The medium was replaced with DMEM/5% FBS and the cells incubated for a further 72 h at 37°C/5% CO<sub>2</sub>. The supernatant containing the virus was harvested and concentrated using the Lenti-X™ Concentrator (631231; Clontech).

HEK293TN cells were seeded in a 6 well plate at a density of 1 x10<sup>5</sup>/well and incubated at 37°C/5% CO<sub>2</sub> overnight. The medium was removed and replaced with a dilution of either 0, 1:10 or 1:50 virus in DMEM/10% FBS/5 µg/mL polybrene (1 mL volume). The plate was centrifuged at 800 rpm (37°C) for 1 h. 1 mL/well of additional DMEM/10% FBS was added and the plate incubated for 72 h (37°C/5% CO<sub>2</sub>). The transduced cells were subsequently passaged into fresh medium DMEM/10% FBS/1 µg/mL puromycin (in T75 flasks) for 7 d. Following growth of stable transformants, 6 colonies were selected at random to be individually cultured in DMEM/10% FBS and assayed for luciferase activity. The remaining cells were cultured as a heterogeneous population.

#### **14. Methods to determine inhibition of an XBP1 luciferase reporter in HEK293TN cells and assess compound cytotoxicity to HEK293TN cells**

Reporter XBP1s HEK293TN cells were seeded at 2000 cells/well (30 µL) in DMEM/10% in 384 well white polystyrene plates (164610; Thermo Fisher Scientific) and incubated at 37°C/5% CO<sub>2</sub> overnight. Compounds were diluted to a stock concentration of 10 mM in 100% DMSO and dispensed into the assay plate in a concentration response curve (CRC) format using an Echo 550® acoustic dispenser (Labcyte). Compound CRCs ranged from 57 nM to 49 µM in 1% DMSO (final assay



concentration). The compounds and cells were incubated at 37°C/5% CO<sub>2</sub> for 1 h. To induce the stress response the stress agent tunicamycin was added. A concentration of tunicamycin was chosen to reflect a 70%-80% stimulation of activity. Tunicamycin was diluted to a stock concentration of 10 mg/mL in 100% DMSO. This was further diluted to 909 µg/mL, was then added into a Labcyte plate and dispensed into all assay wells using the Echo 550® (final concentration 0.68 µg/mL). Control wells contained either 50 µM 7-(1-(3,5-difluorobenzyl)-1*H*-pyrazol-4-yl)-3*H*-imidazo[4,5-*b*]pyridine (Supplementary Figure S9) in 1% DMSO (maximum inhibition) or tunicamycin (maximal response) (0.68µg/mL) (The plates were incubated at 37°C/5% CO<sub>2</sub> for 5 h prior to addition of 15 µL/well Steady-Glo Luciferase Assay System reagent (E2520; Promega). The plates were incubated at r.t. for 30 min and the luminescent signal was detected using an EnVision Multimode Plate Reader (Perkin Elmer Lifesciences). In addition, to monitor cytotoxic effects caused by test compounds, compounds +/- tunicamycin were added as previously described. Then, 5 µL CellTitreBlue® reagent (Promega) was added for 3 h at 37°C/5% CO<sub>2</sub> and plates were read on the EnVision Multimode Plate Reader. Compound IRE1α agonist activity, leading to enhanced cleavage of the reporter XBP1-luciferase fusion mRNA, was addressed by testing compounds in the absence of tunicamycin. In this case the tunicamycin was added to the high controls at a higher concentration of 50 µM.

## **15. Quantification of XBP1s expression in NCI-H929 cells by immunofluorescence**

NCI-H929 (ATCC) suspension cells were maintained in RPMI (72400-054) supplemented with 5% SeraPlus FBS (Pan BioTech) and 5% Hyclone tetracycline-free FBS (GE Healthcare) and maintained at 37°C, 5% CO<sub>2</sub>. To aid the attachment of the cells for immunofluorescence, the plates (6005182, Packard Viewplate) were coated with 50 µL poly-L-lysine (0.01%, P4707 Sigma). NCI-H929 cells were then plated at 4x10<sup>5</sup> cells/mL in 80 µL of media and left overnight at 5%CO<sub>2</sub>/37°C. Dilution series to construct a concentration response curve for each of the compounds were established using the Echo®550 acoustic dispenser (Labcyte). Compounds and DMSO (1 µL final volume) were first added to a dry 96 well plate (Greiner). An intermediate dilution (10x final concentration) was achieved by the addition of 49 µL RPMI/10% FBS. 10 µL of this solution was added to the cells (1:500 final dilution). In addition, difluorobenzyl)-1H-pyrazol-4-yl)-3H-imidazo[4,5-b]pyridine (Supplementary Figure S9) (20 µM final) was added in the same way to control wells to give the low control for normalization. The range of concentrations for these experiments was from 20 µM-0.0156 µM final concentration. Tunicamycin (10 µg/mL final, 10 µL) was then added to each of the wells and incubated at 5%CO<sub>2</sub>/37°C for 4 h.

The cells were then fixed with formaldehyde (3.7% final in PBS, F8775, Sigma) for 15 min at r.t., permeabilised with ice cold methanol (15 min at -20°C) and followed by a blocking step with 5% BSA (w/v) (A2153, Sigma)/1% triton X-100 (v/v) (A984, Sigma) in PBS for 1 h at room temperature. The primary antibody incubation for XBP1s (619502, Biolegend 0.13 µg/mL) was then carried out overnight at 4°C in 1% BSA (w/v), 0.5% TritonX-100(v/v). Following a wash step, a secondary goat anti-rabbit Alexa Fluor®488 antibody (A11034, 4 µg/mL) was added for detection of XBP1s (1 h incubation at r.t.) and finally the nuclear dye Hoechst 33342 (H3570, 2

$\mu\text{g/mL}$  final) was added for 15 min at r.t. Images were captured on an IN Cell Analyzer 1000 (GE Healthcare) using the 360\_40x excitation and HQ460\_40M and HQ480\_40X HQ535\_50M emission filters (10x objective, >4000 cells analysed per well, 8 fields/well) and analysed using the IN Cell Analyzer Workstation software

3.7.2. Nuclei were detected and segmented using the 360\_40x - HQ460\_40M channel (minimum area  $35 \mu\text{m}^2$ ). Apoptotic/mitotic nuclei were removed from the quantification by detecting DNA fragmentation of the nuclei in the Hoechst channel. Cells with fragmented nuclei were eliminated from the quantification so that only XBP1s nuclear intensity from 'healthy' cells was measured. Cells were separated into 'Healthy', 'Mitotic', and 'Apoptotic' cells by using 'Decision tree' in WorkStation software. Briefly, small condensed bright nuclei in the 360\_40X – HQ460\_40M channel were detected by plotting a threshold graph of nucleus/cytoplasmic (nuc/cyt) intensity and total area of fragmented DNA (organelle). Nuclei with a nuc/cyt intensity >2.2 and a total area >9 were mitotic and excluded. To remove nuclei that were fragmented or apoptotic the remaining population was then further subdivided and those with a nuc/cyt intensity <0.7 and a total area <0.7 were also excluded. The residual healthy cell population thus had larger and brighter Hoechst stained nuclei. As XBP1s showed a nuclear localisation the same minimum area criteria was used to measure the intensity in the 480\_40X – HQ535\_50M green channel. The mean well background intensity was then subtracted from the mean XBP1 nuclear intensity to determine the  $\text{IC}_{50}$  relative to the 7-(1-(3,5-difluorobenzyl)-1*H*-pyrazol-4-yl)-3*H*-imidazo[4,5-*b*]pyridine + tunicamycin and the tunicamycin only controls using Dotmatics Studies (Dotmatics, UK).

## **16. Quantification of XBP1s and DNAJB9 mRNA expression in NCI-H929 cells by qPCR**

Unless otherwise stated all reagents were purchased from ThermoFisher Scientific. NCI-H929 (ATCC) suspension cells were maintained in RPMI supplemented with 5% SeraPlus FBS (Pan BioTech) and 5% Hyclone tetracycline free FBS (GE Healthcare) and maintained at 37°C, 5% CO<sub>2</sub>. Cells were plated at 5x10<sup>5</sup> cells/mL in a 24 well plate and left to equilibrate at 37°C, 5% CO<sub>2</sub> for 2 h. Compounds (+/- tunicamycin (Sigma T7765; Sigma) were then diluted in DMSO (1:2 fold) and added to the cell culture media to give final concentrations ranging from 20 µM to 0.078 µM (0.3% DMSO, 10 µg/mL tunicamycin final concentration). The cells were treated with compound for 4 h at 5% CO<sub>2</sub> and 37°C, harvested, centrifuged and the cell pellet resuspended in nucleic acid purification buffer (200 µL). The lysates were then transferred in to a MagNa Pure 96 (Roche) well processing plate and the RNA extracted using an automated protocol on the MagNa Pure 96 instrument (Roche). This methodology uses a DNAase step to inactivate genomic DNA.

Following extraction, the RNA was quantified using the Quanti-iTRNA broad range kit (Q10213) and read using the monochromator (ex/em wavelengths 644/673 nm) on an EnVision Multimode Plate Reader (Perkin Elmer Lifesciences). All samples were then normalised with DNase/RNase free water (Ambion) to give the same quantity of RNA (typically 500-1000 ng/µL) in each sample. Normalisation was carried out on the Janus® Automated workstation (Perkin Elmer Lifesciences) and the samples collected in a 96 well PCR plate (ABI microamp plate). To carry out the Reverse Transcription of the normalised RNA to cDNA, the cDNA synthesis kit iScript™ (Bio-Rad) was used and carried out on a Tetrad PTC-225 thermal cycler (MJ research; reaction protocol - 5 min at 25°C, 30 min at 42°C, 5 min at 85°C, hold

at 4°C). The resulting cDNA was then diluted in DNase/RNase free water to a concentration of 100 ng/μL.

For quantification of XBP1s mRNA, real time PCR – TaqMan, was carried out in a multiplex reaction with the human RPLPO (large ribosomal protein) endogenous control gene. For each sample, a reaction mixture containing the following components was made: 5 μL 2X TaqMan universal master mix (4304437); XBP1s (20x) (Hs03929085\_g1, XBP1s FAM-MGB) 0.5 μL; human RPLPO VIC™ MGB (20x, 4326314E) (0.5 μL); nuclease free water (2 μL); cDNA template (2 μL). Final reaction volume was 10 μL. Each sample was run in triplicate in a 384 well plate (Applied Biosystems).

For quantification of DNAJB9 mRNA, real time PCR – TaqMan, was carried out in a singleplex reactions with the RPLPO endogenous control gene run in separate wells. For each sample, two reaction mixtures containing the following components were made: 1.5 μL 2XTaqMan universal master mix; DNAJB9 (20x) (Hs01052402\_m1, DNAJB9 FAM-MGB) 0.5 μL; nuclease-free water (2.5 μL); cDNA template (2 μL). 2.5 μL 2 X TaqMan universal master mix; human RPLPO VIC™ MGB (20x) (0.5 μL); nuclease-free water (2.5 μL); cDNA template (2 μL). Final reaction volumes were 10 μL. Each sample was run in triplicate in a 384 well plate (Applied Biosystems). All the TaqMan reactions were carried out on the ViiA7™ qPCR machine and analysis of data on the ViiA7™ software (relative quantitation - RQ values, ±minimum and maximum RQ) (ThermoFisher Scientific). (Reaction protocol - 2 min at 50°C, 10 min 95°C then 40 cycles of 15 s at 95°C, 1 min at 60°C).

## **17. Inhibition of IRE1 $\alpha$ -GFP oligomerization in T-Rex293-IRE1-3F6HGFP cells**

Oligomerization assays were carried out using T-Rex293-IRE1-3F6HGFP cells which contained a doxycycline inducible IRE $\alpha$  construct and were a kind gift from Professor Peter Walker<sup>41</sup>. Cells (6,400/well) were plated into poly-L-lysine coated, dark walled, 96 well plates and induced with 10 nM doxycycline for 24 h prior to the assay. On the day of the assay, medium was replaced with TET free medium and cells were pre-treated with 5 drug concentrations for 1 h and then either vehicle treated or stressed with tunicamycin (10  $\mu$ g/mL) for 4 h. Cells were fixed with formaldehyde, washed with PBS and counterstained with Hoechst 33342.

Appropriate positive and negative controls were included. Plates were analysed on an IN Cell Analyzer 1000 using associated software (IN Cell Analyzer Workstation software 3.7.2., GE Healthcare) and 7-12 fields counted per well and the results expressed as Foci/100 cells for each treatment. Data analysis and curve fitting was carried out using PRISM 7 software (Graphpad Prism v7.03).

#### **18. Quantification of total IRE1 $\alpha$ and pIRE1 $\alpha$ expression in H929 myeloma cells**

ProteinSimple capillary electrophoresis immunoassay (ProteinSimple, Santa Clare, CA, USA) was performed according to the ProteinSimple user manual (<https://www.proteinsimple.com/wes.html>). In brief, whole cell extract samples were mixed at a ratio of 4 parts cell lysates to 1 part 5X Fluorescent Master Mix in a micro-centrifuge tube to give final protein concentrations of 0.3 mg/mL. Samples were denatured at the same time as the biotinylated ladder. All the samples, blocking buffers, primary antibodies (1 in 100 dilutions for pIRE1 and 1 in 50 dilutions for total IRE1) and HRP-conjugated secondary antibodies were loaded into the selected plate wells. Electrophoresis and immunodetection steps within the capillary system took

place automatically under instrument default settings. The digital image was analyzed and quantified with Compass software after normalization to  $\beta$ -actin (loading control) (ProteinSimple Wes, ProteinSimple, Santa Clare, CA, USA).

### 19. X-ray crystallography of 33-IRE1 $\alpha$

hIRE1 $\alpha$  was expressed and purified as previously described<sup>6</sup>. hIRE1 was crystallized by hanging-drop vapor diffusion. A protein-ligand mixture was prepared comprising hIRE1 at 10 mg/mL and compound **33** at 1.4 mM. This was mixed with reservoir solution containing 20% polyethylene glycol 3350, 0.2 M sodium acetate and 0.1 bis-tris propane (pH 6.5) in a 1:1 ratio. Crystallization experiments were conducted at 18°C. Crystals were briefly soaked in reservoir buffer supplemented with 25% ethylene glycol before plunging into liquid nitrogen. X-ray diffraction data were collected at 100 K from a single cryo-cooled crystal using an in-house X-ray system (Rigaku 007-HF, Saturn 944+ CCD detector). Diffraction data were integrated and scaled using CCP4 software<sup>50</sup>. The structure of apo-hIRE1 was solved by molecular replacement using PHASER<sup>S1</sup> with a single protomer from the apo-hIRE1 crystal structure (PDB code 4Z7G<sup>6</sup>). Manual model building was performed in COOT<sup>51</sup> and refinement was performed in PHENIX<sup>S2</sup>. The structure was validated using MolProbity<sup>S3</sup>.

S1 McCoy, A. J.; Grosse-Kunstleve, R. W.; Adams, P. D.; Winn, M. D.; Storoni, L. C.; Read, R. J. Phaser crystallographic software. *J. Appl. Crystallogr.* **2007**, *40*, 658-674.

- S2 Afonine, P. V.; Grosse-Kunstleve, R. W.; Echols, N.; Headd, J. J.; Moriarty, N. W.; Mustyakimov, M.; Terwilliger, T. C.; Urzhumtsev, A.; Zwart, P. H.; Adams, P. D. Towards automated crystallographic structure refinement with phenix.refine. *Acta Crystallogr. D Biol. Crystallogr.* **2012**, *68*, 352-367.
- S3 Davis, I. W.; Leaver-Fay, A.; Chen, V. B.; Block, J. N.; Kapral, G. J.; Wang, X.; Murray, L. W.; Arendall, W. B. 3<sup>rd</sup>; Snoeyink, J.; Richardson, J. S.; Richardson, D. C. MolProbity: all-atom contacts and structure validation for proteins and nucleic acids. *Nucl. Acids Res.* **2007**, *35*, W375-W383.

**20. Table S3:** Data collection and refinement statistics for the crystal structures of **2-IRE1 $\alpha$**  and **33-IRE1 $\alpha$** .

|                                                    | <b>2-IRE1<math>\alpha</math></b> | <b>33-IRE1<math>\alpha</math></b> |
|----------------------------------------------------|----------------------------------|-----------------------------------|
| PDB code                                           | 6hx1                             | 6hv0                              |
| <b>Data Collection</b>                             |                                  |                                   |
| Space group                                        | C 2                              | C 2                               |
| Cell dimensions <i>a</i> , <i>b</i> , <i>c</i> (Å) | 144.41, 47.07, 86.37             | 144.04, 46.05, 86.34              |
| $\alpha$ , $\beta$ , $\gamma$ (°)                  | 90.0, 112.1, 90.0                | 90.00, 112.71, 90.00              |
| Resolution (Å)                                     | 2.13 (2.38 - 2.13) <sup>a</sup>  | 2.73 (2.86 – 2.73) <sup>a</sup>   |
| Unique reflections                                 | 28816 (7825)                     | 14150 (1770)                      |
| Multiplicity                                       | 3.7 (3.6)                        | 3.5 (2.7)                         |
| Completeness (%)                                   | 94.5 (91.6)                      | 99.2 (94.8)                       |
| $R_{\text{meas}}$ (%)                              | 8.1 (51.7)                       | 16.7 (74.2)                       |
| CC <sub>1/2</sub>                                  | 0.998 (0.919)                    | 0.986 (0.584)                     |



| <b>Refinement</b>                         |              |              |
|-------------------------------------------|--------------|--------------|
| Resolution (Å)                            | 80.00 – 2.14 | 32.97 - 2.73 |
| Number of reflections<br>(working / test) | 27136 / 1537 | 14143 / 1415 |
| R <sub>cryst</sub> (%)                    | 21.7         | 21.7         |
| R <sub>free</sub> (%)                     | 26.8         | 26.9         |
| Total no. of atoms:                       |              |              |
| Protein                                   | 3156         | 3021         |
| Water                                     | 122          | 57           |
| Ligand                                    | 24           | 23           |
| Deviation from ideal geometry:            |              |              |
| Bond lengths (Å)                          | 0.007        | 0.004        |
| Bond angles (°)                           | 1.25         | 0.844        |
| All-atom clashscore                       | 0.82         | 6.88         |
| Ramachandran                              |              |              |
| Outliers (%)                              | 0.0          | 0.54         |
| Allowed (%)                               | 2.9          | 6.27         |
| Favored (%)                               | 97.1         | 93.19        |
| Cbeta deviations (%)                      | 0            | 0            |
| Rotamer outliers (%)                      | 1.40         | 4.63         |

<sup>a</sup> Values in parentheses refer to the highest resolution shell.

## 21. Methods for the synthesis of compound 33.

**6-Chloro-3-(1*H*-indazol-5-yl)-*N*-isopropylimidazo[1,2-*b*]pyridazin-8-amine (33):**

Prepared from isopropylamine, **33** and 5-(4,4,5,5-tetramethyl-1,3,2-dioxaborolan-2-yl)-1*H*-indazole using the methods described for **2** to give **33** (17% over 2 steps). <sup>1</sup>H NMR (500 MHz, DMSO-*d*<sub>6</sub>) δ 13.18 (s, 1H), 8.53 – 8.48 (m, 1H), 8.19 (t, *J* = 1.3 Hz, 1H), 7.95 – 7.92 (m, 2H), 7.66 (dd, *J* = 8.7, 1.0 Hz, 1H), 7.61 (d, *J* = 8.6 Hz, 1H), 6.30 (s, 1H), 4.12 – 3.81 (m, 1H), 1.27 (d, *J* = 6.4 Hz, 6H); <sup>13</sup>C NMR (126 MHz, DMSO-*d*<sub>6</sub>) δ 147.6, 142.8, 139.1, 134.1, 132.8, 128.9, 125.5, 122.9, 120.8, 118.4, 110.4, 99.5, 90.7, 43.7, 21.7 (2C); LCMS (2 min) *t*<sub>R</sub> = 1.70 min, *m/z* (ESI<sup>+</sup>) 327 (M+H<sup>+</sup>); HRMS *m/z* calcd. for C<sub>16</sub>H<sub>16</sub>N<sub>6</sub><sup>35</sup>Cl (M + H) 327.1119, found 327.1116.

22. Copies of  $^1\text{H}$  and  $^{13}\text{C}$  NMR data for test compounds 2, 5 – 12, 19 – 33.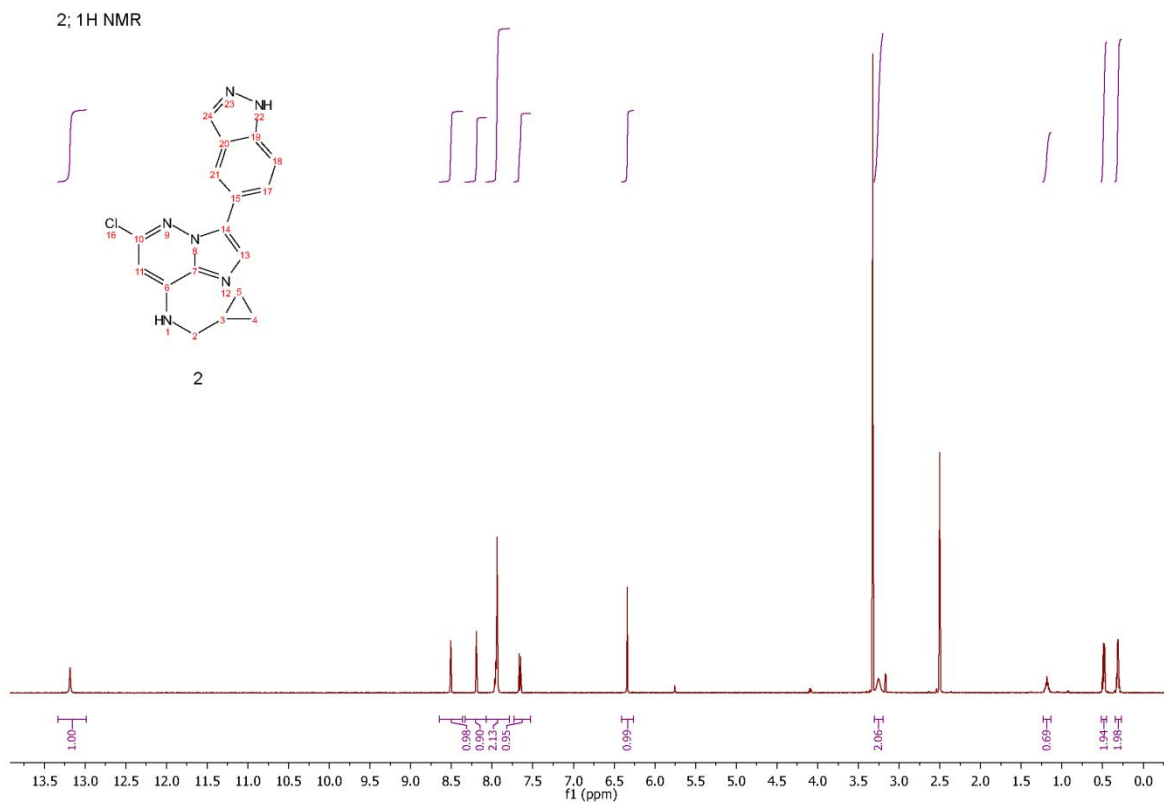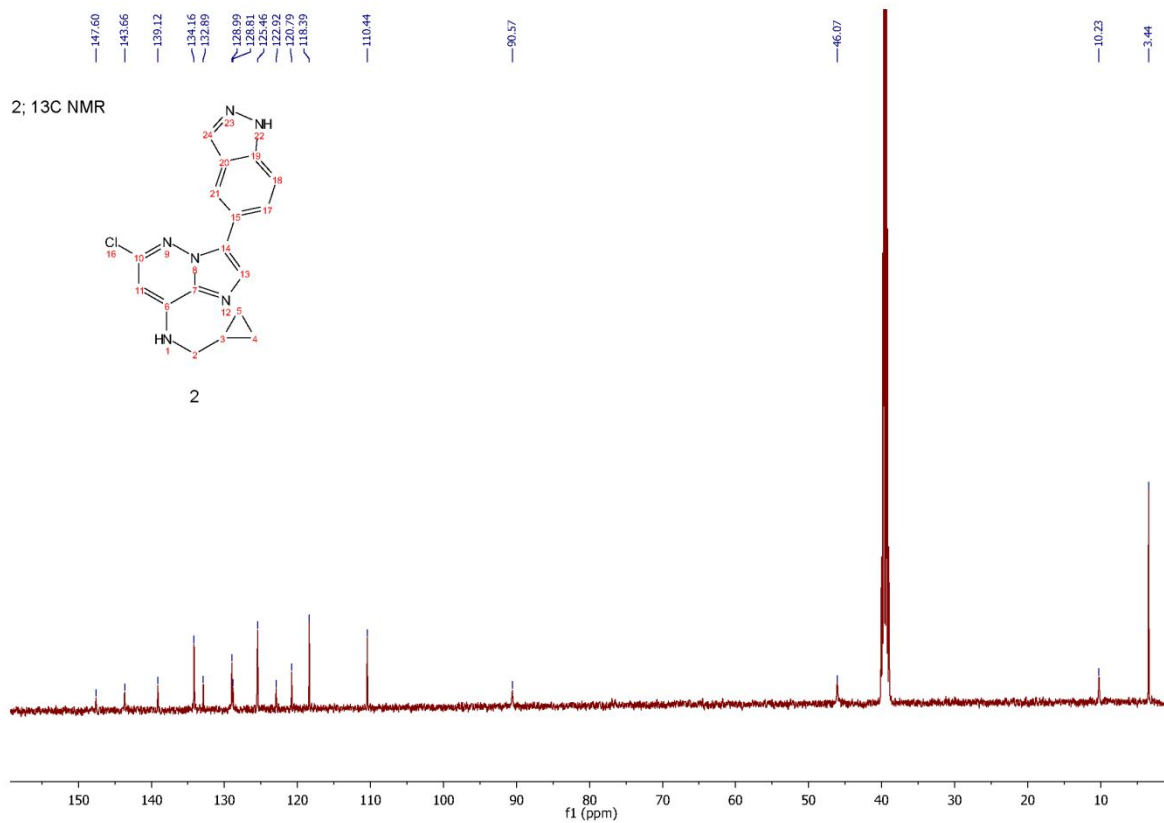

5; <sup>1</sup>H NMR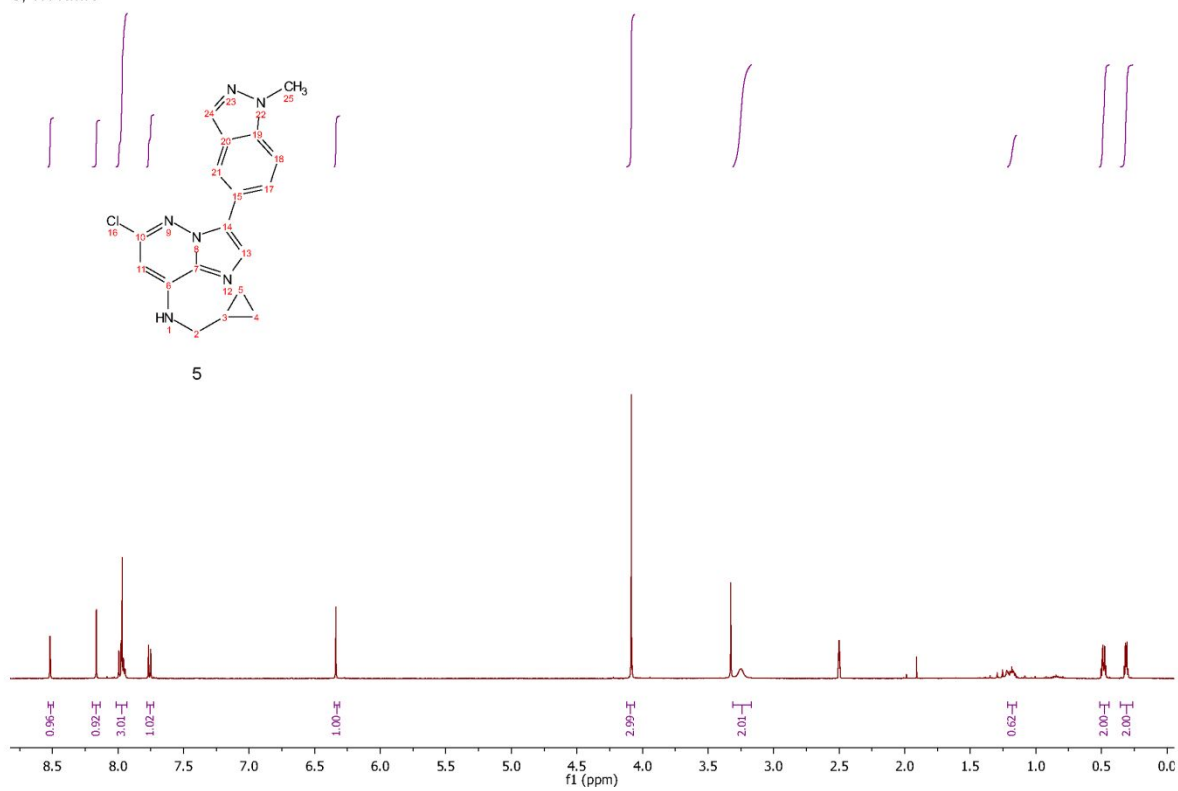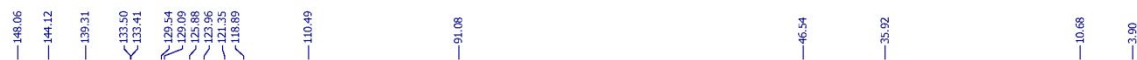5; <sup>13</sup>C NMR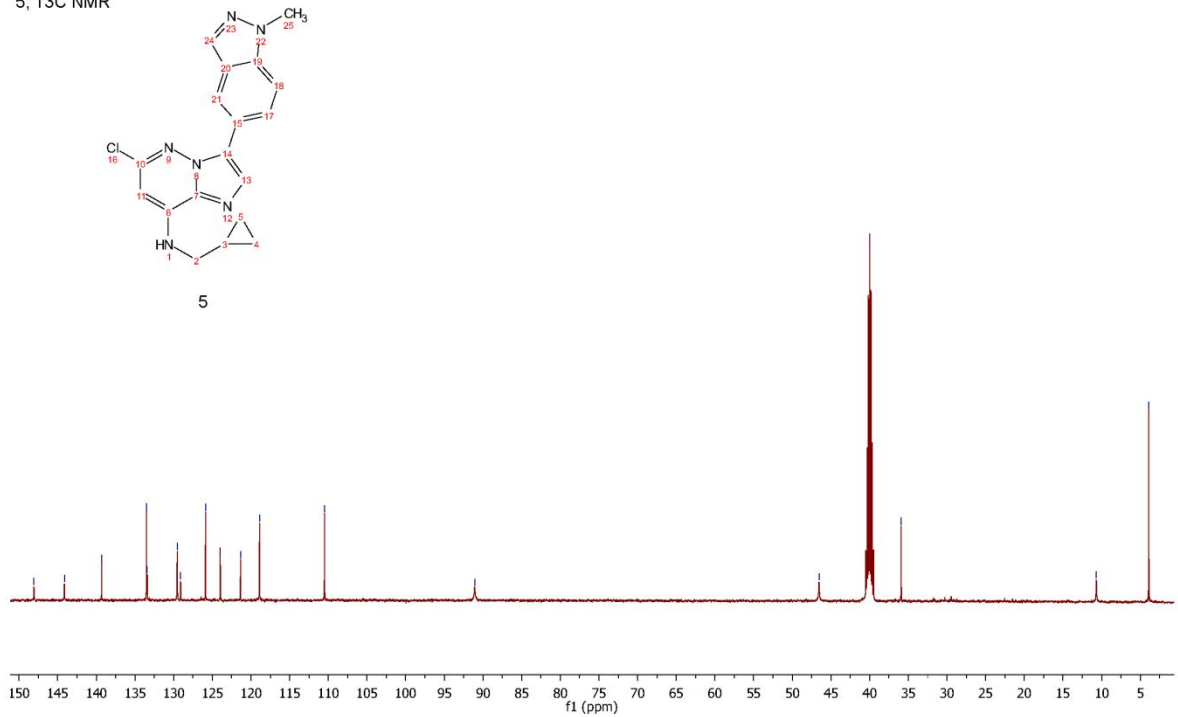

6; <sup>1</sup>H NMR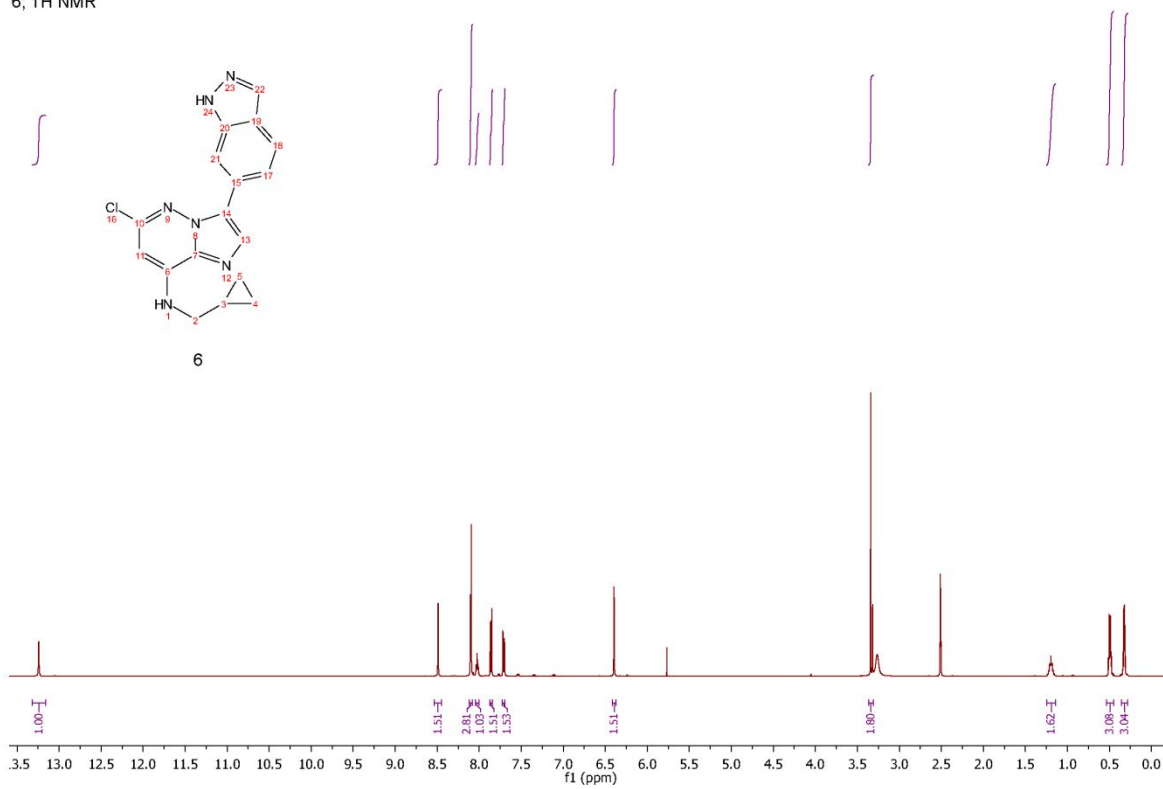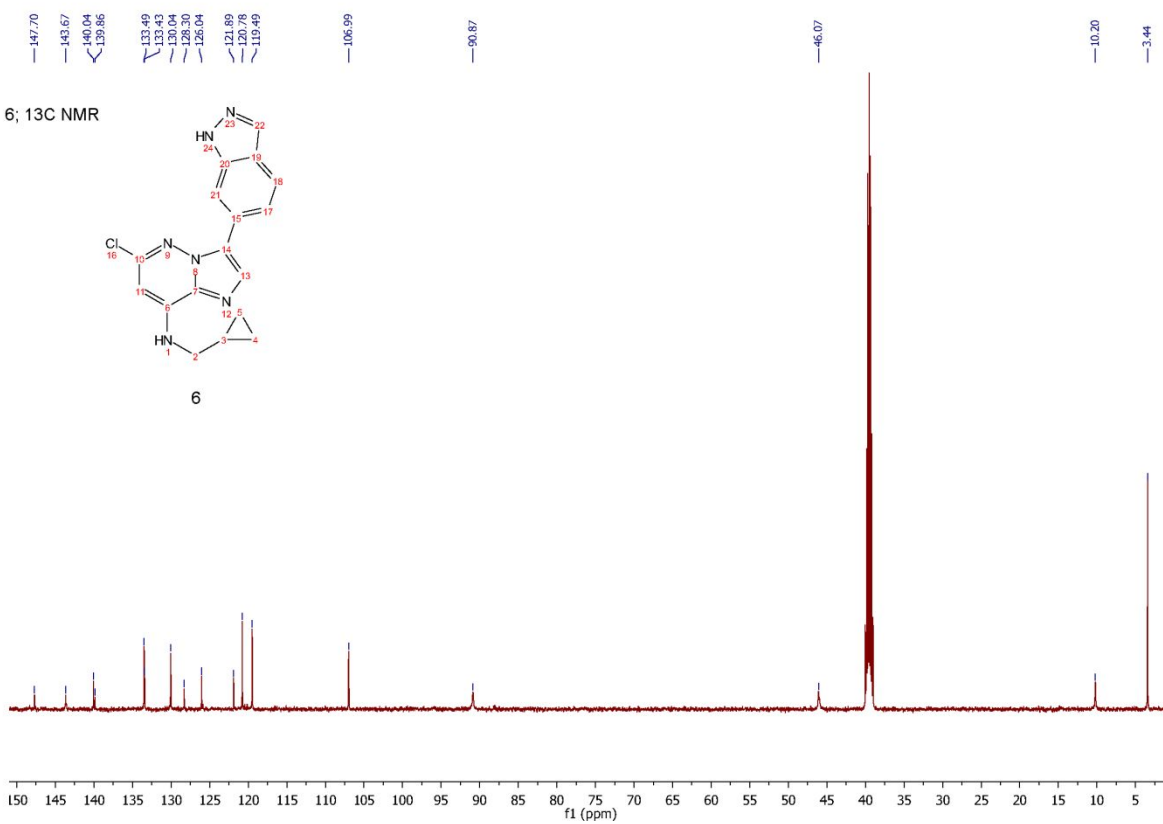

7; <sup>1</sup>H NMR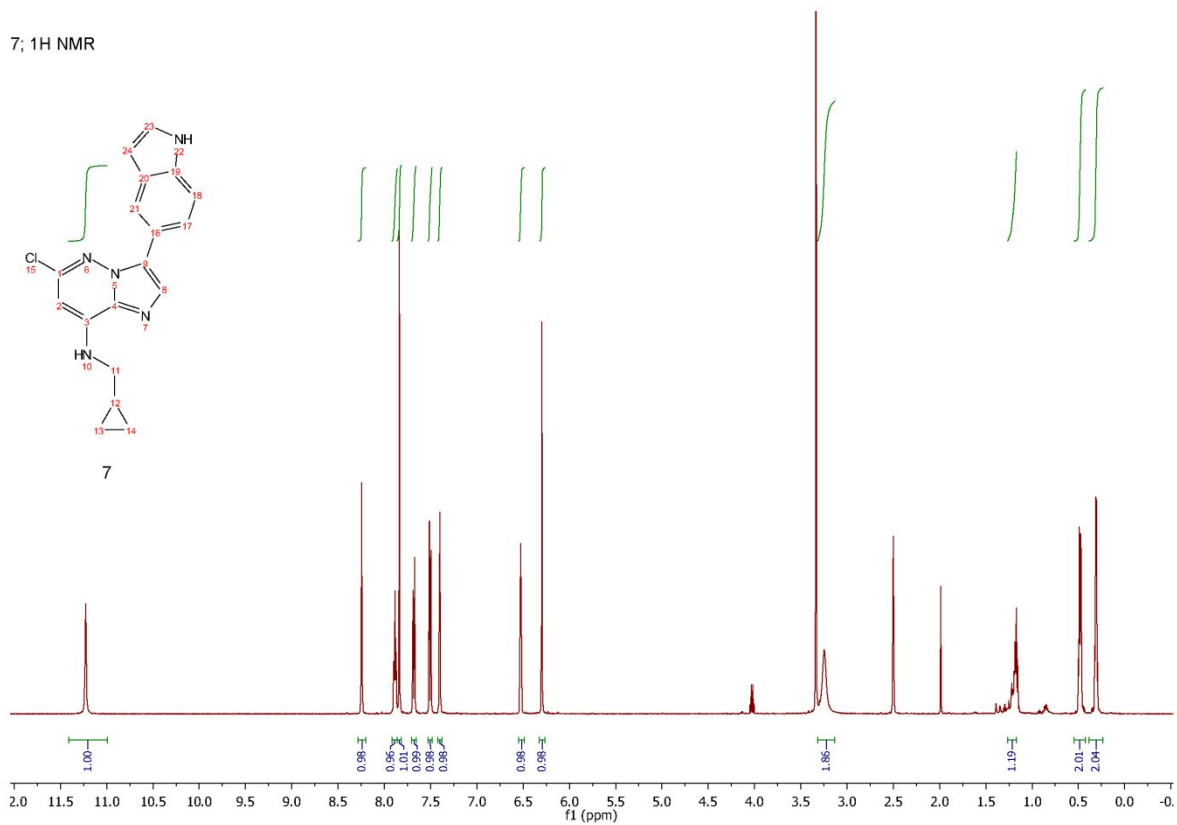7; <sup>13</sup>C NMR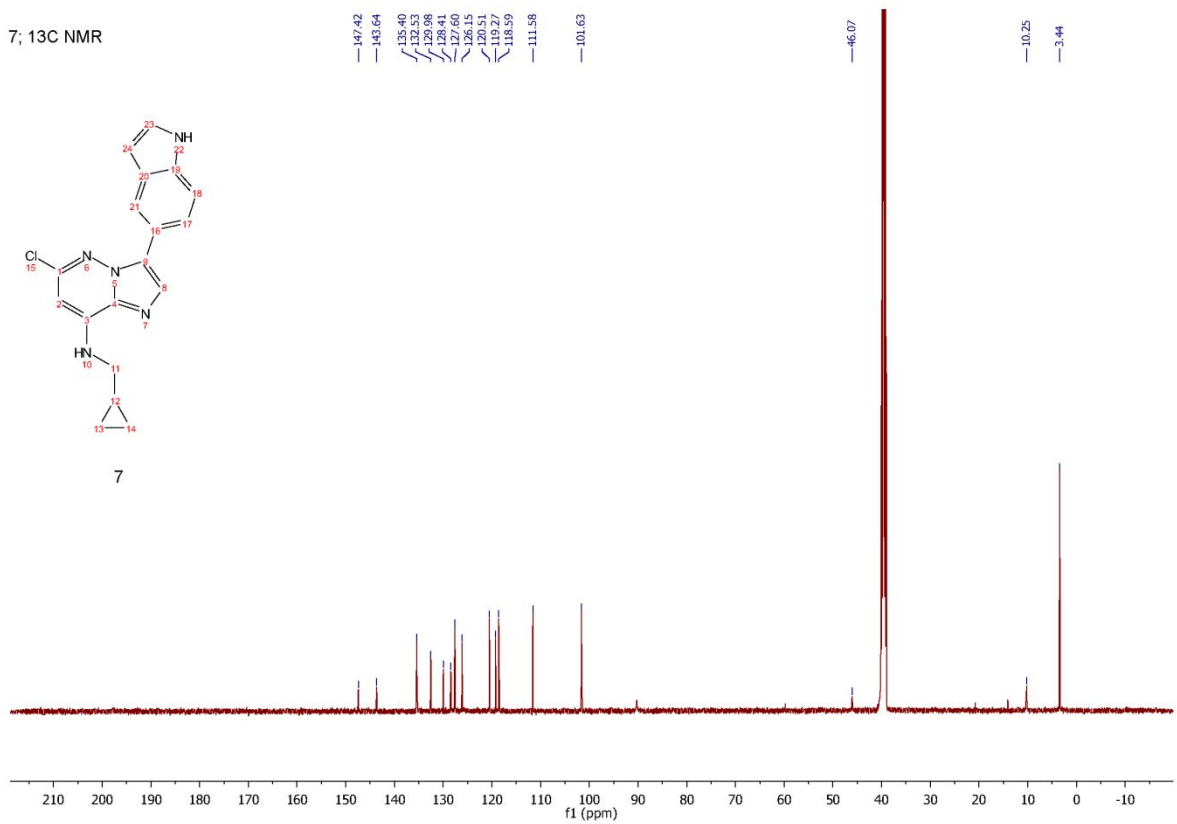

8; <sup>1</sup>H NMR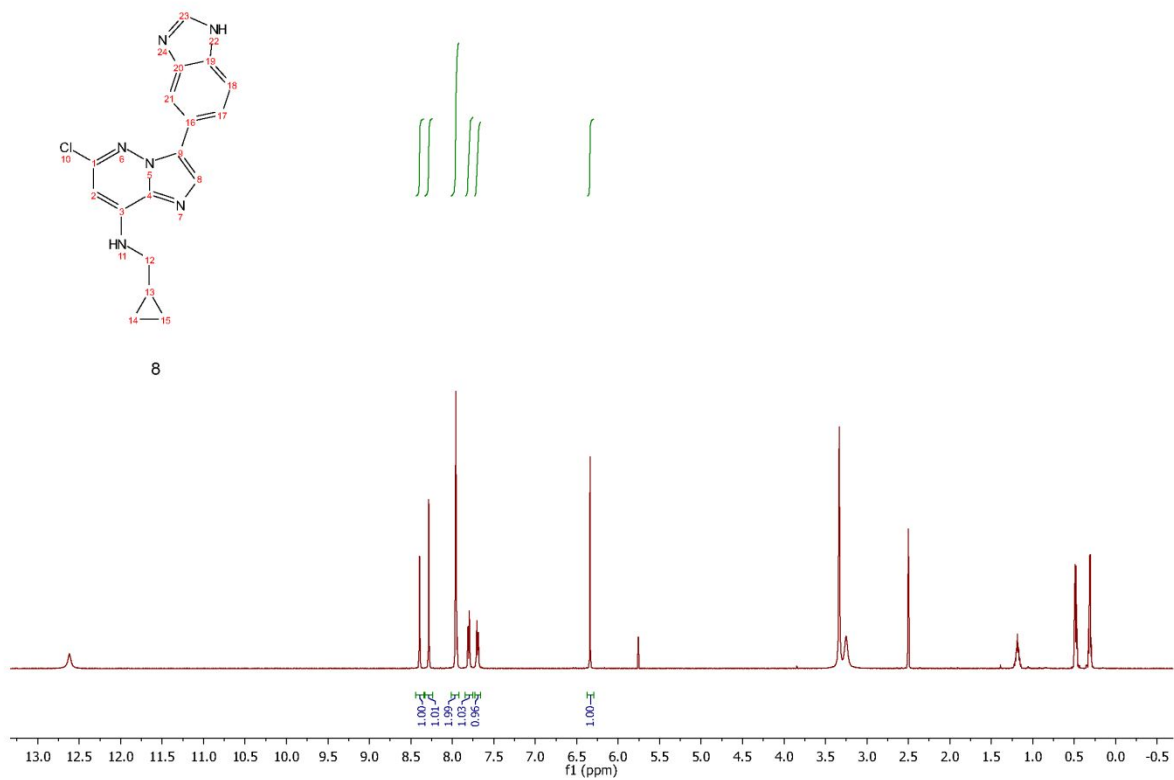8; <sup>13</sup>C NMR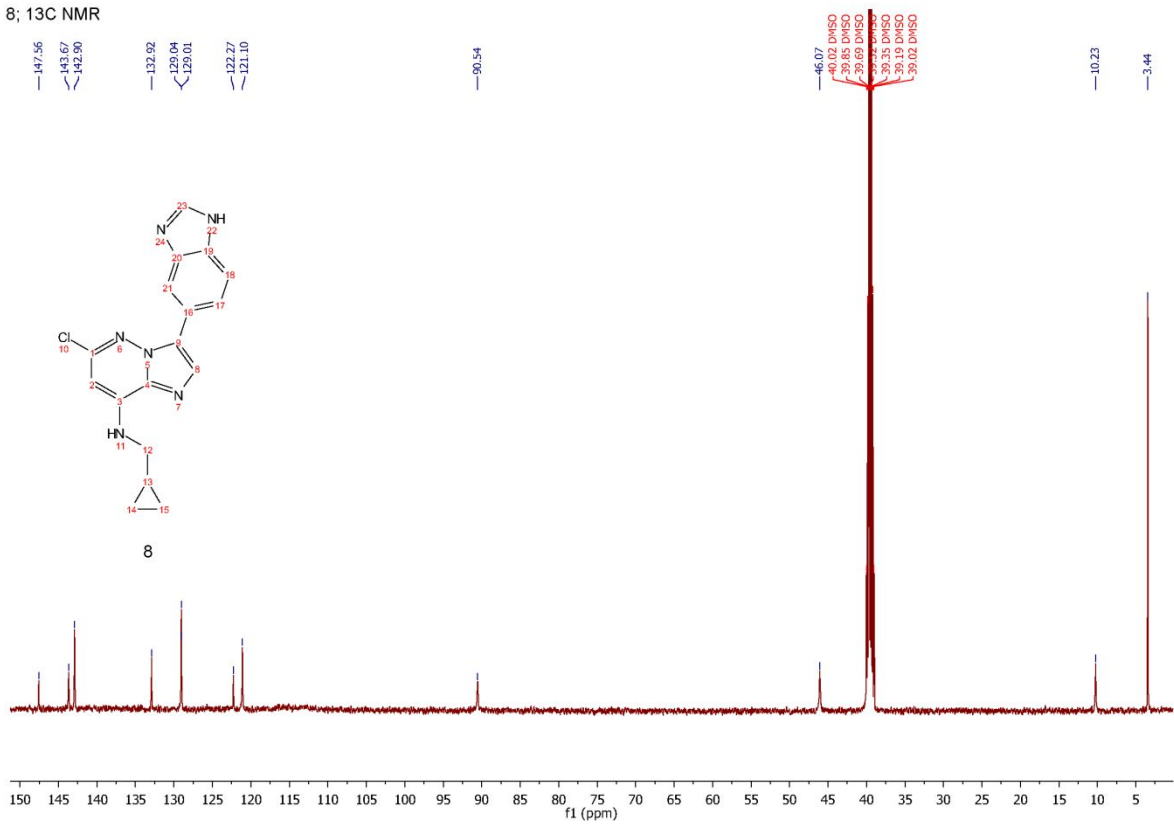

9; <sup>1</sup>H NMR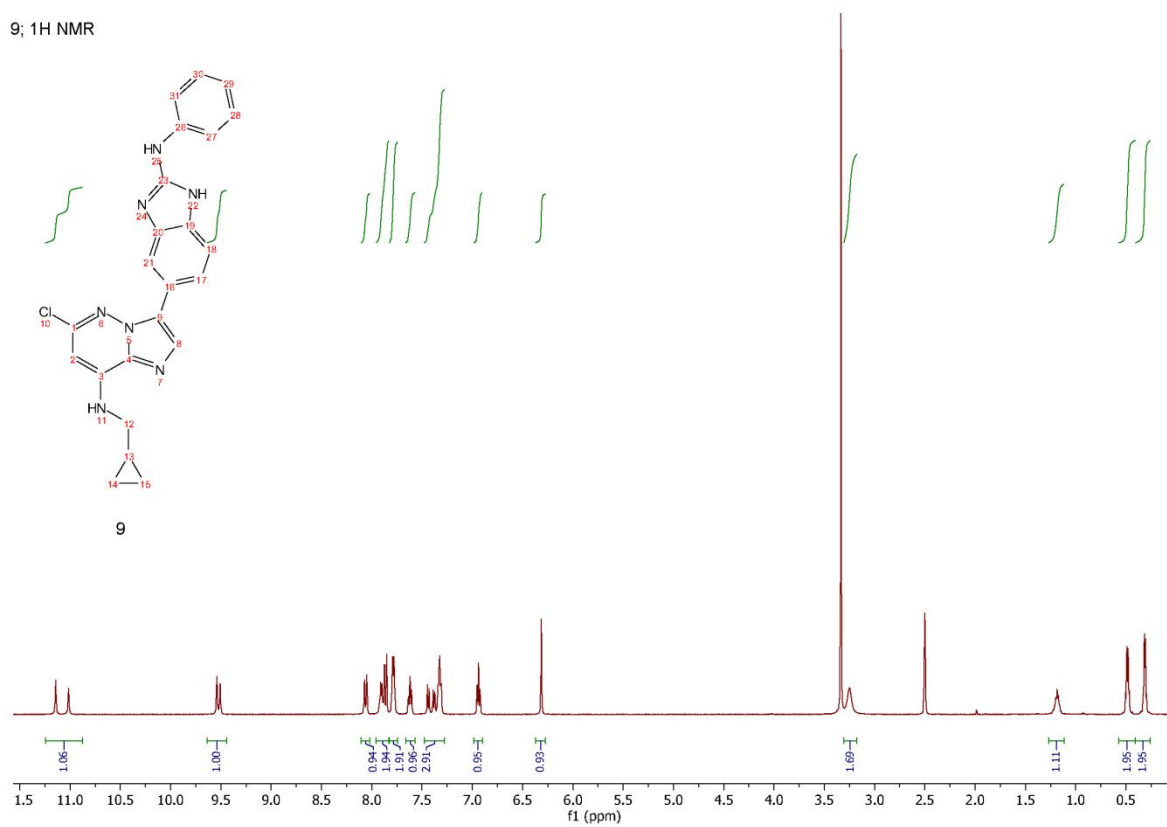9; <sup>13</sup>C NMR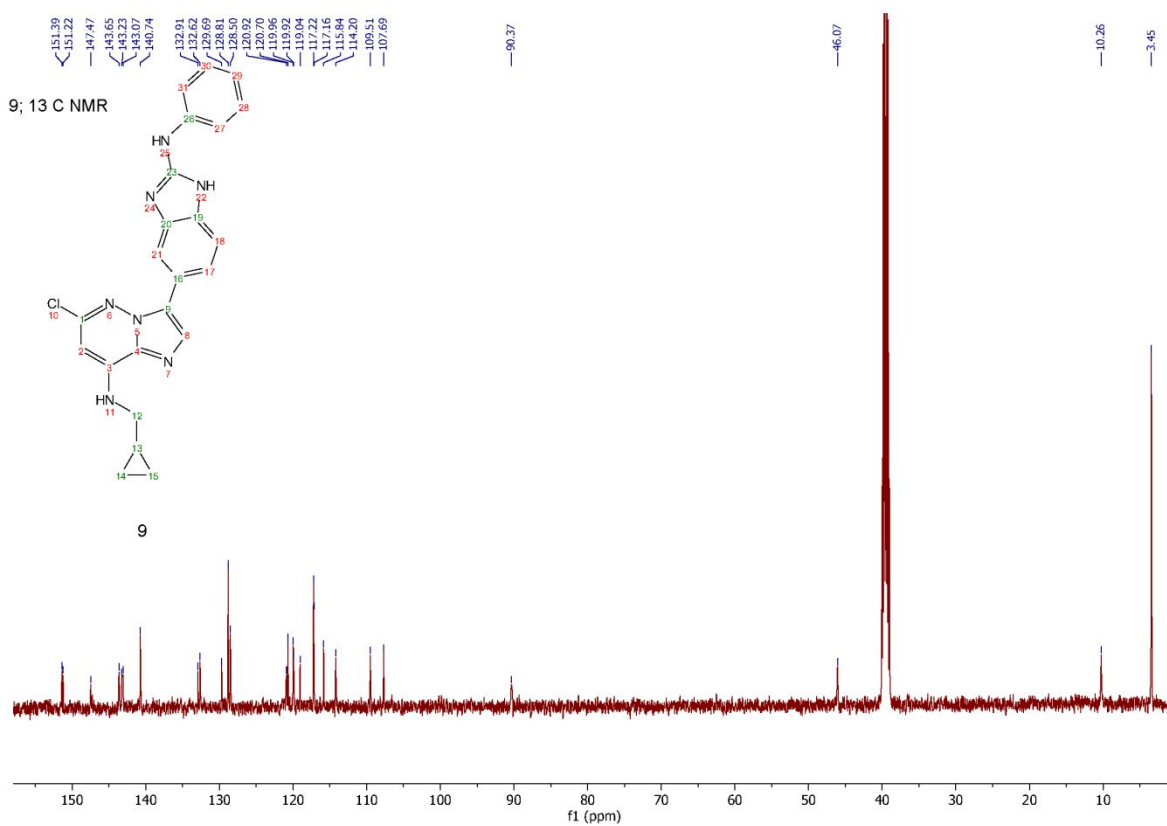



10; <sup>1</sup>H NMR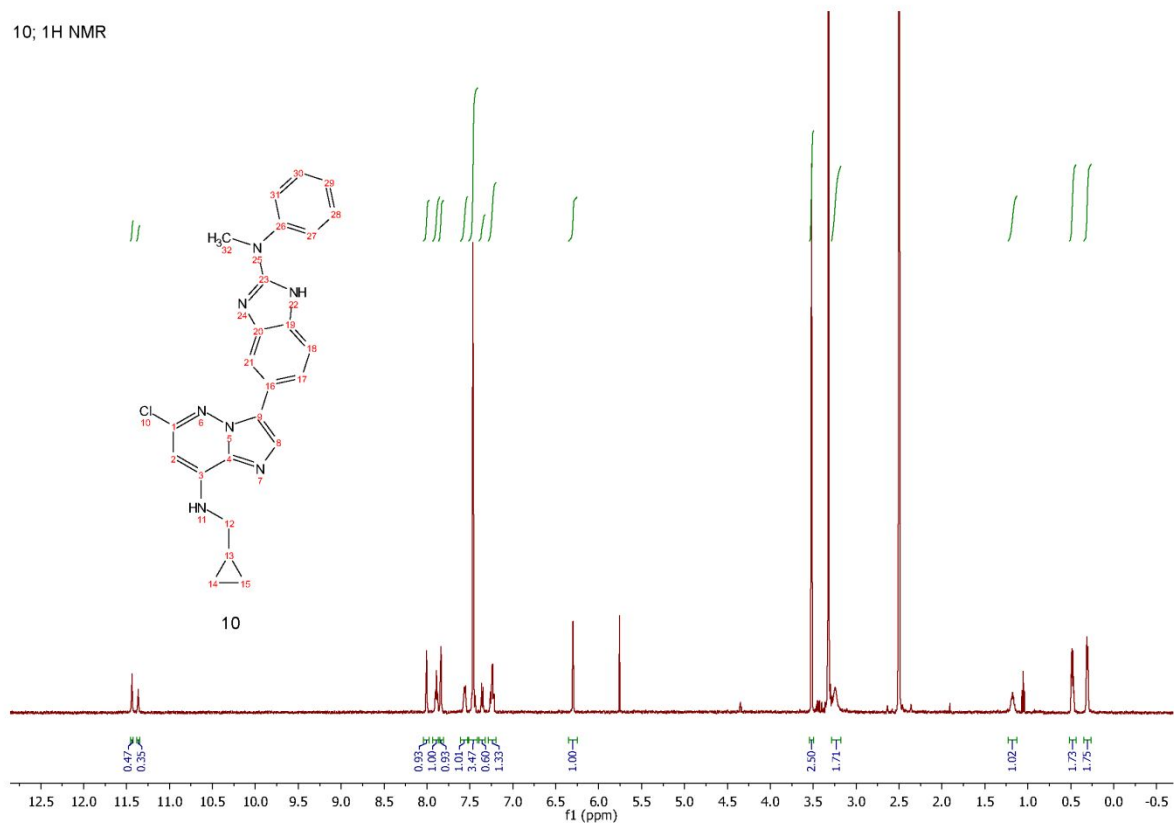10; <sup>13</sup>C NMR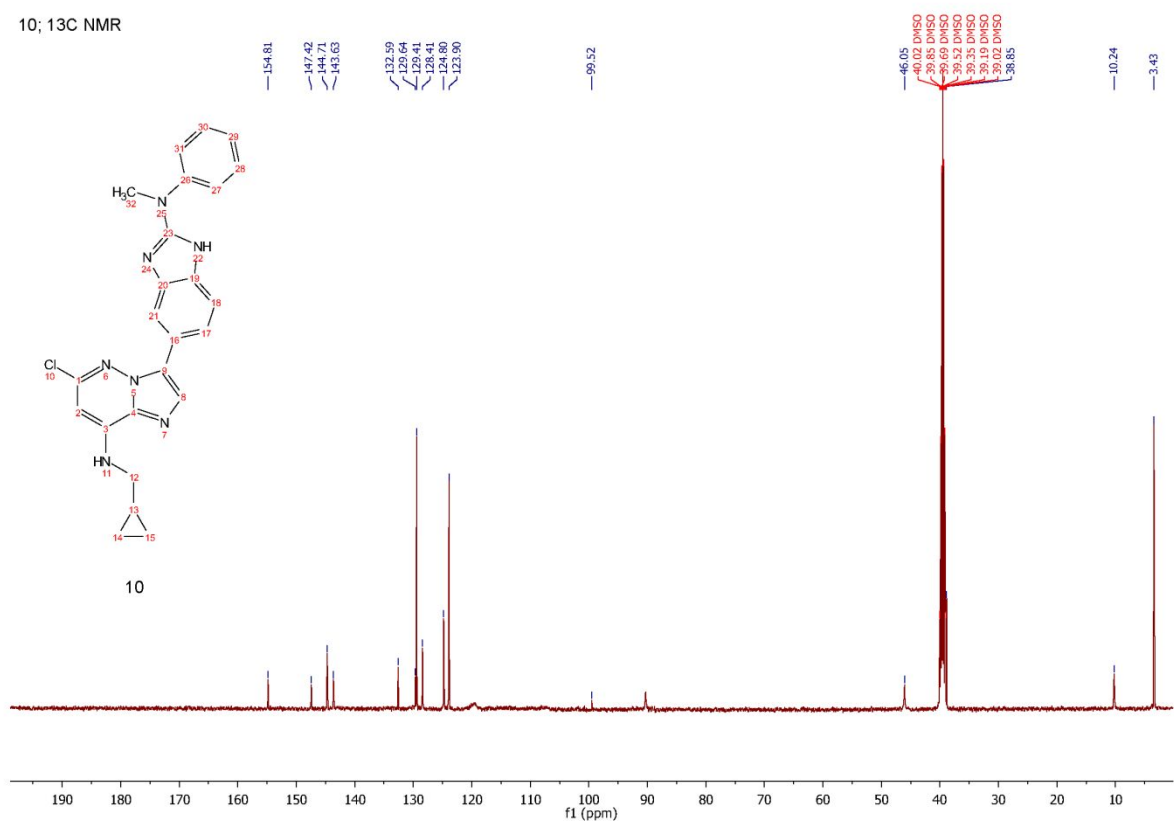

11; <sup>1</sup>H NMR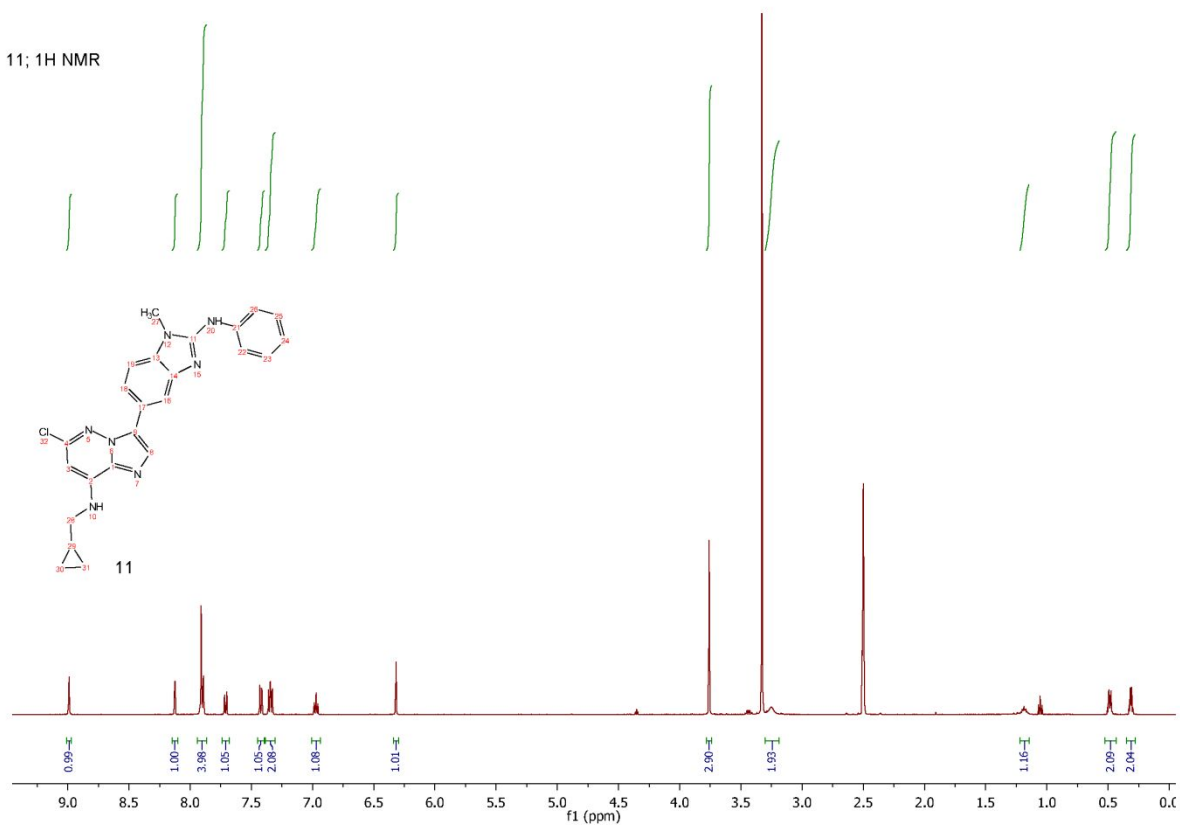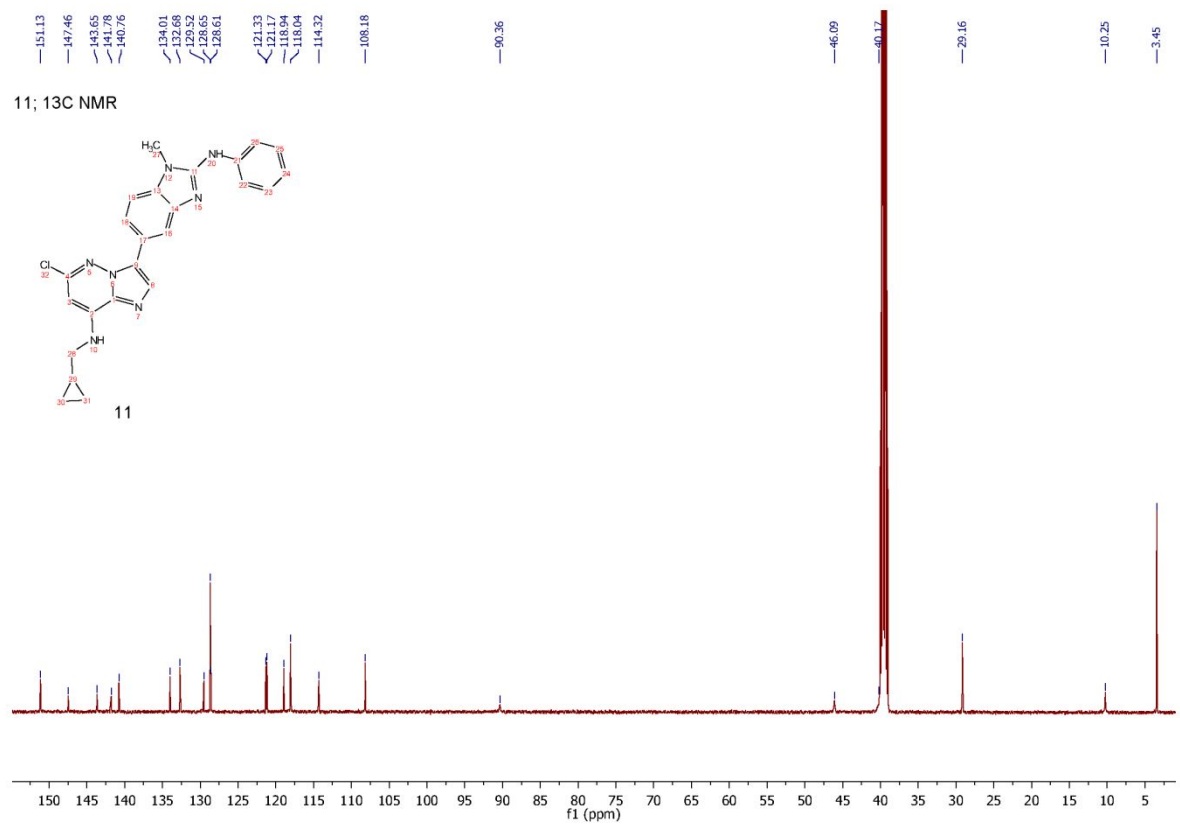

12; <sup>1</sup>H NMR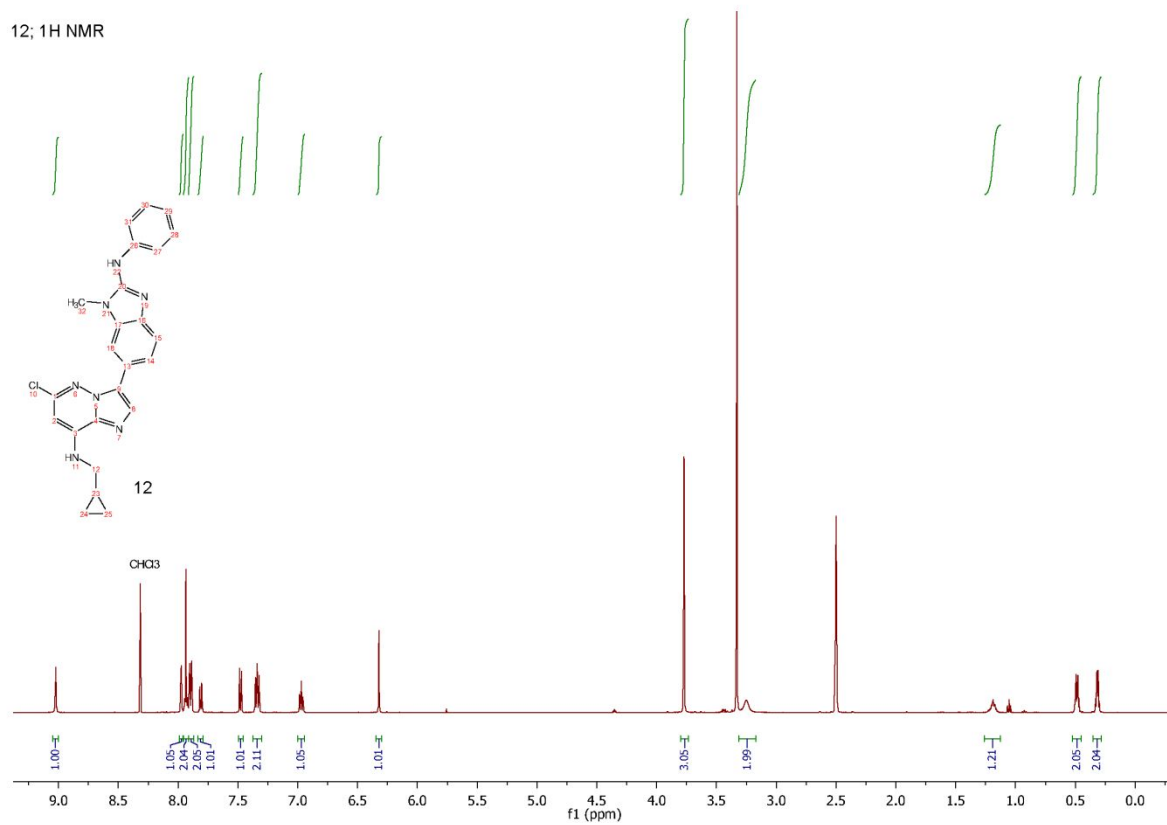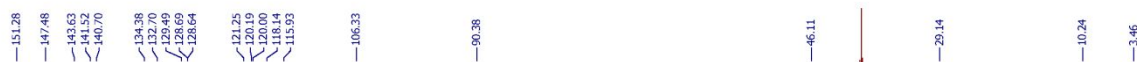12; <sup>13</sup>C NMR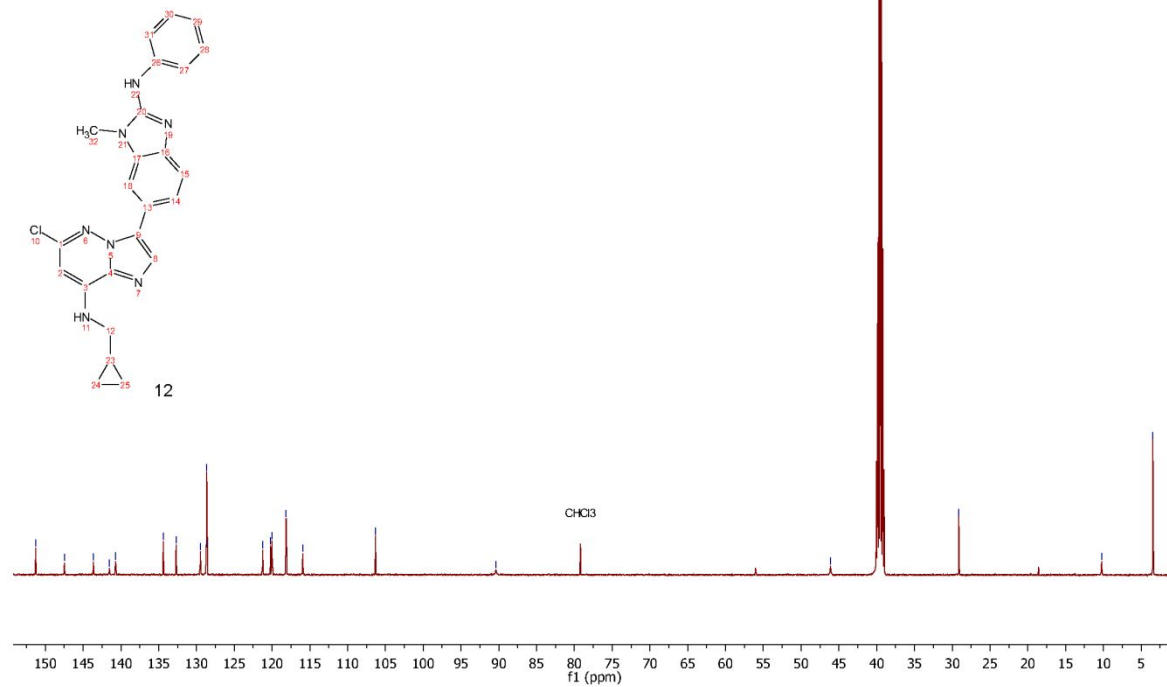

19; <sup>1</sup>H NMR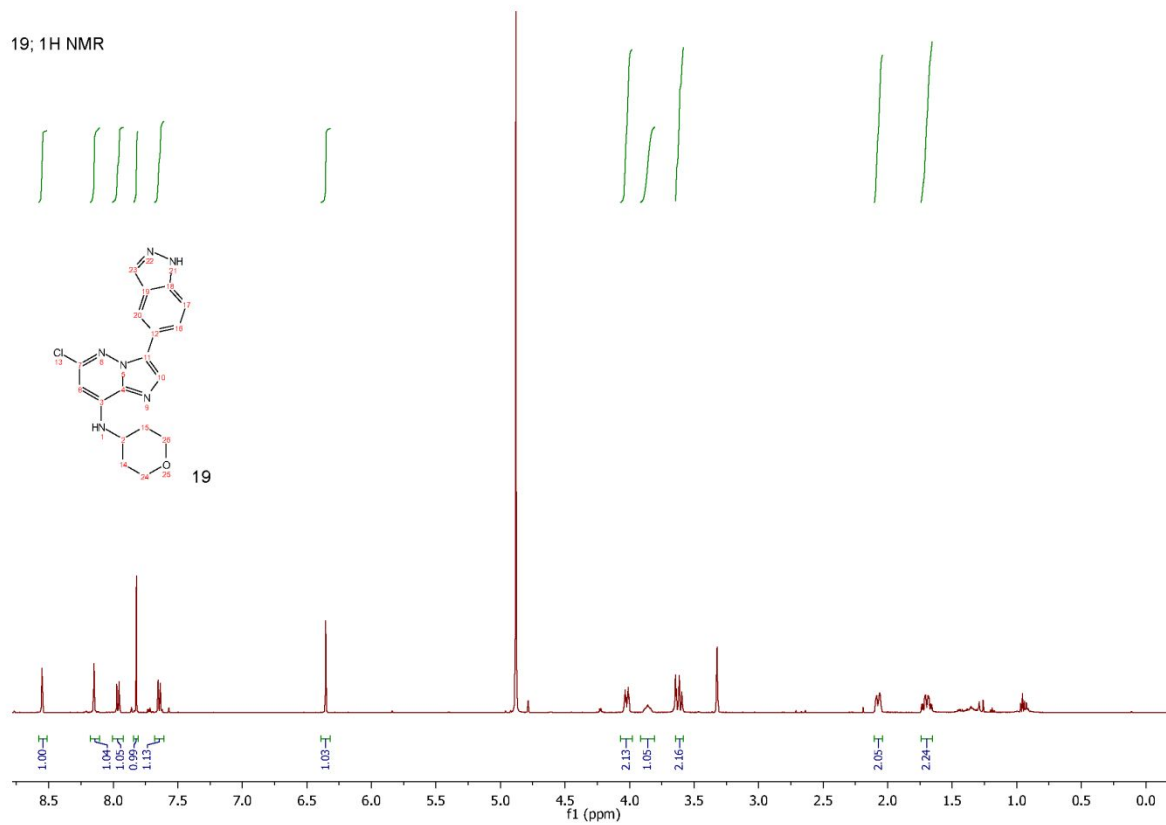

149.87  
143.45  
135.60  
134.45  
132.38  
131.66  
127.56  
127.60  
124.41  
122.57  
120.46  
111.34  
93.20  
67.42  
49.62  
33.29

19; <sup>13</sup>C NMR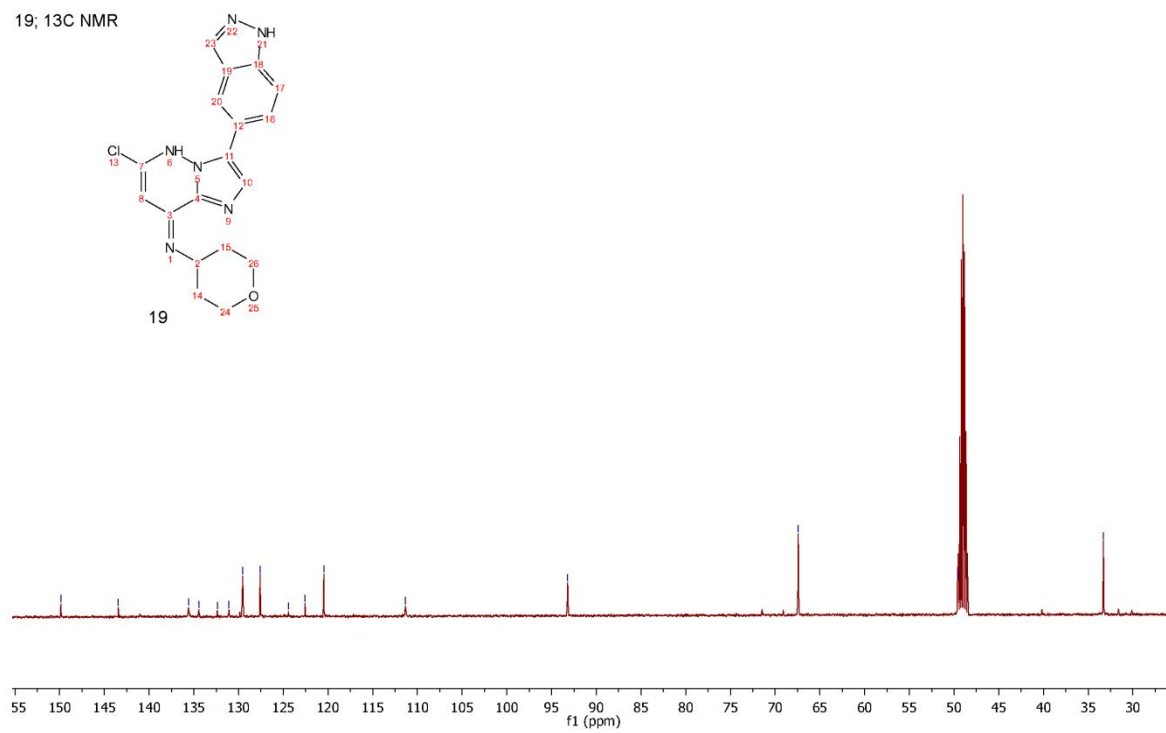

20; <sup>1</sup>H NMR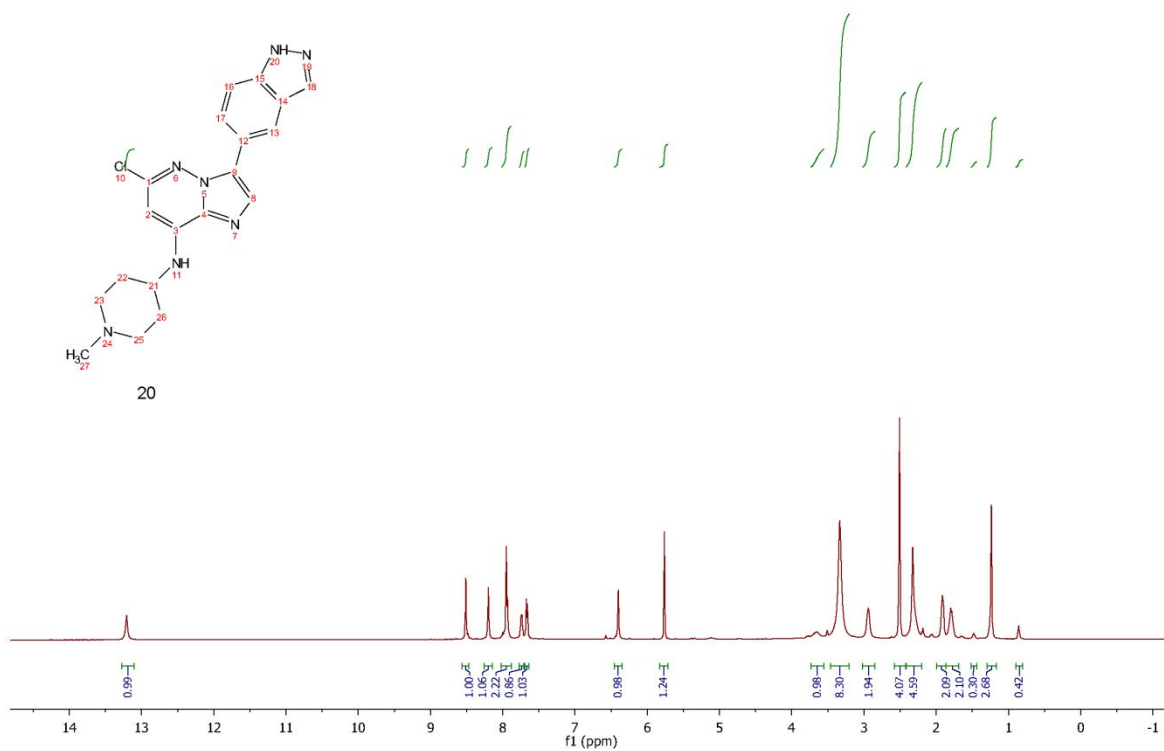20; <sup>13</sup>C NMR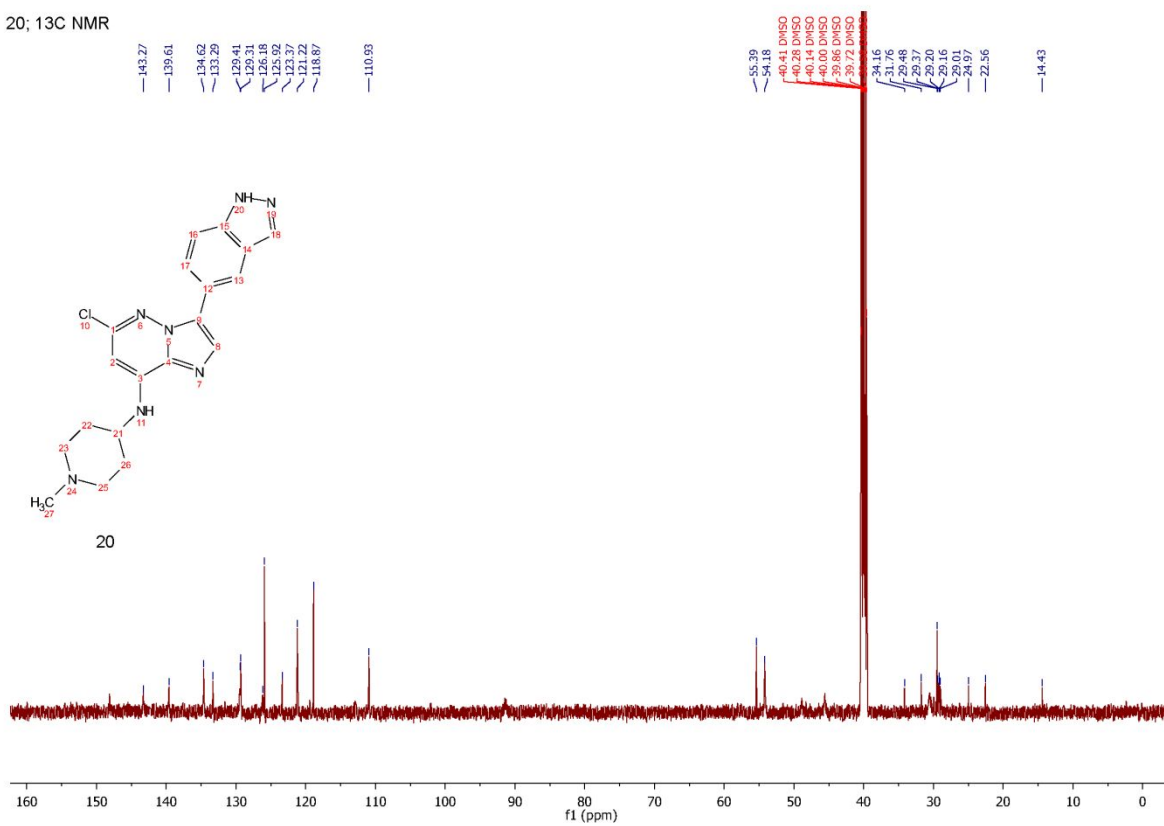

21; <sup>1</sup>H NMR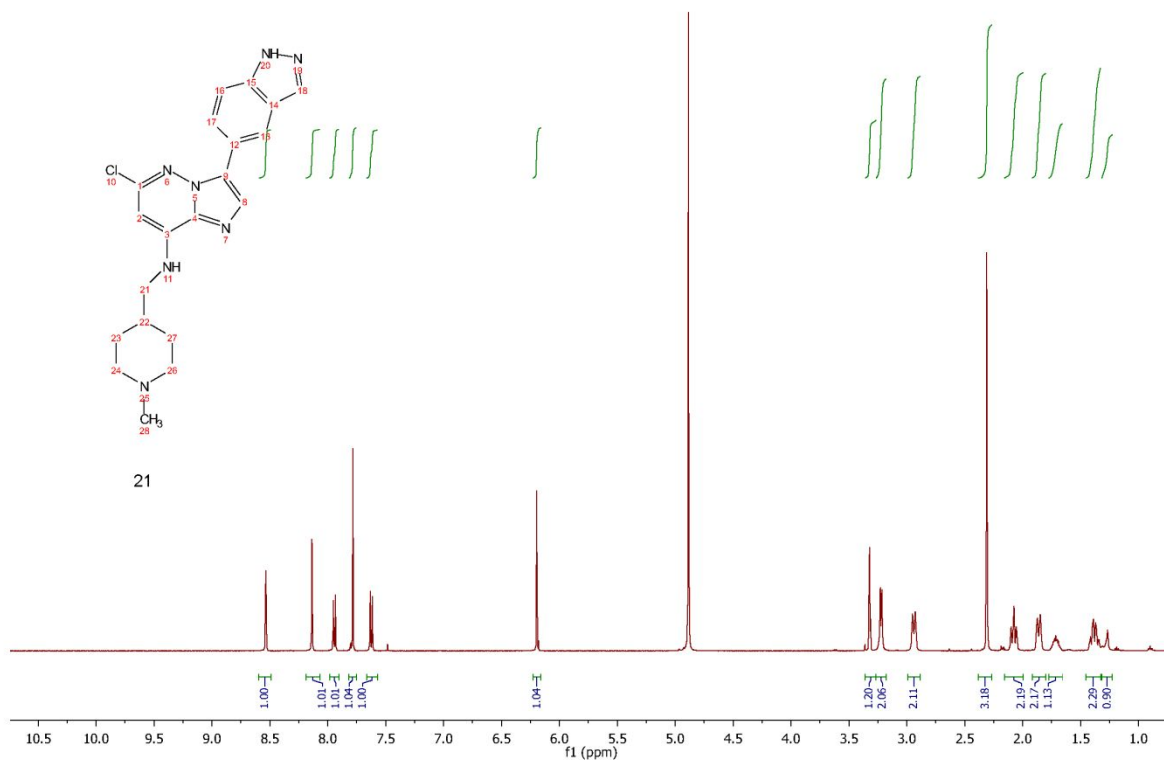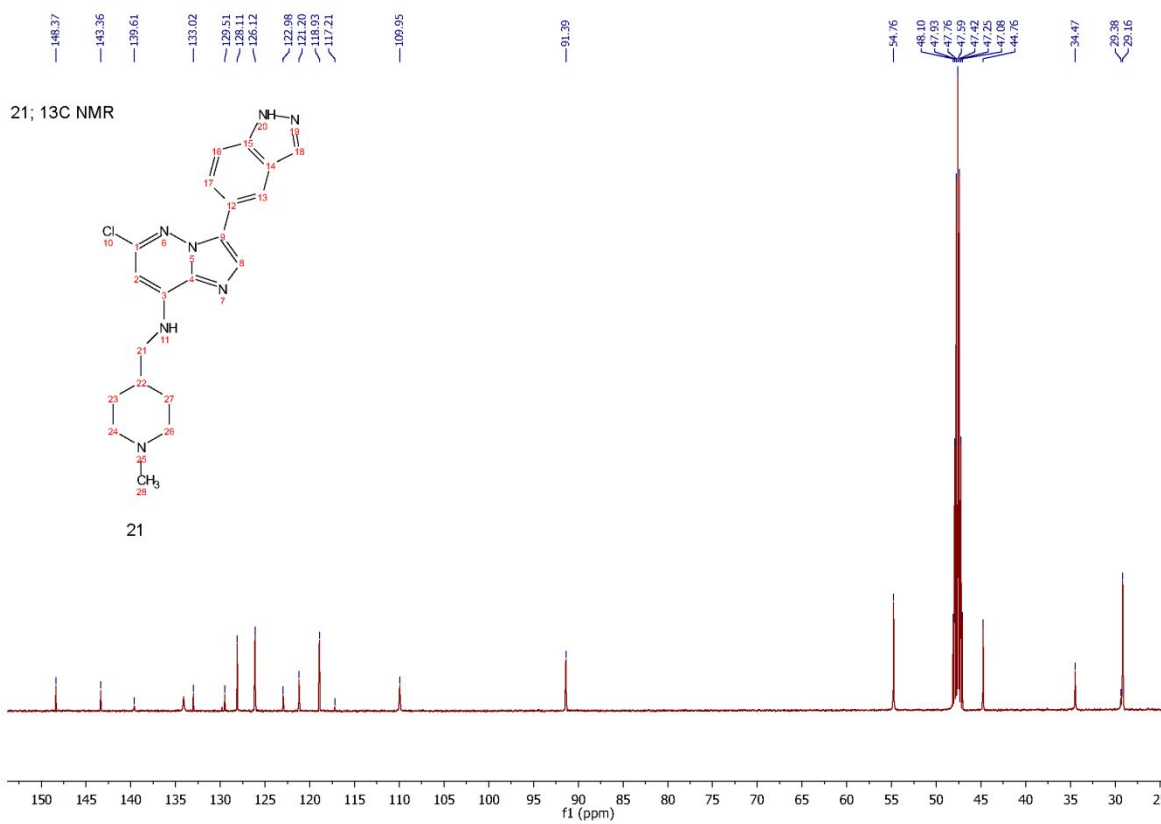

22; <sup>1</sup>H NMR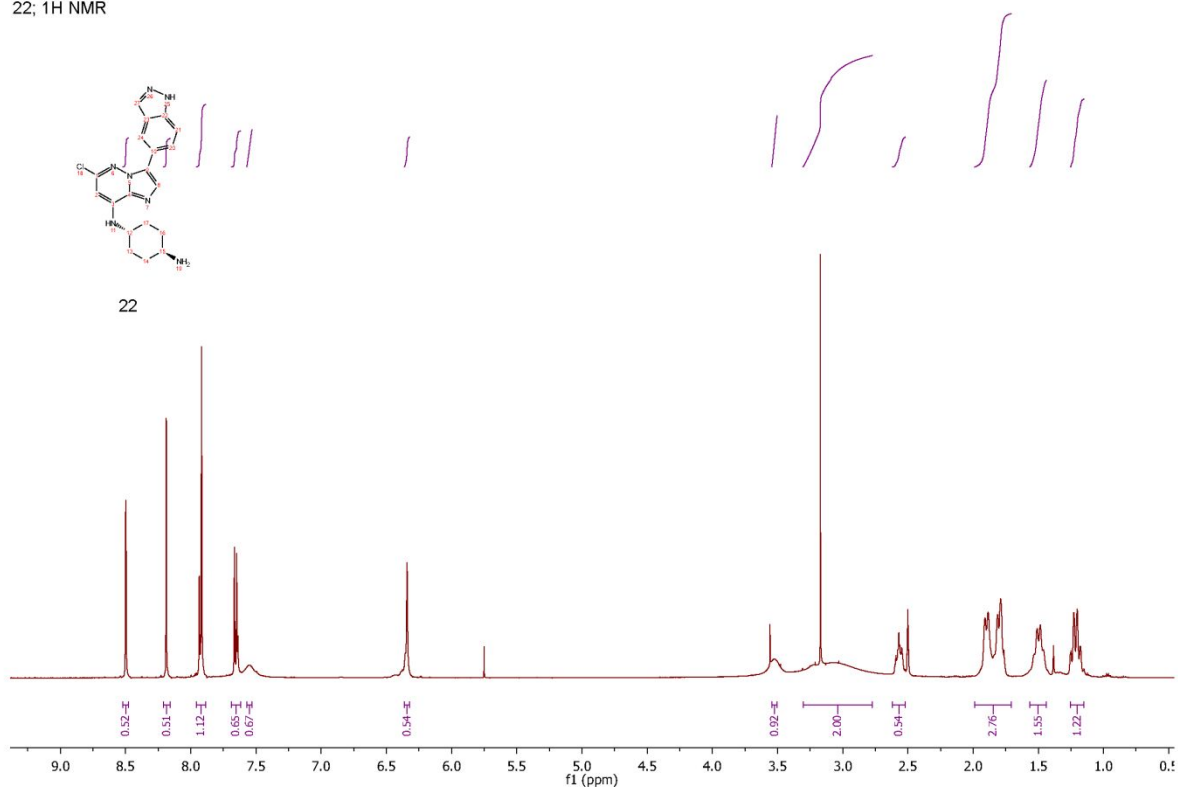22; <sup>13</sup>C NMR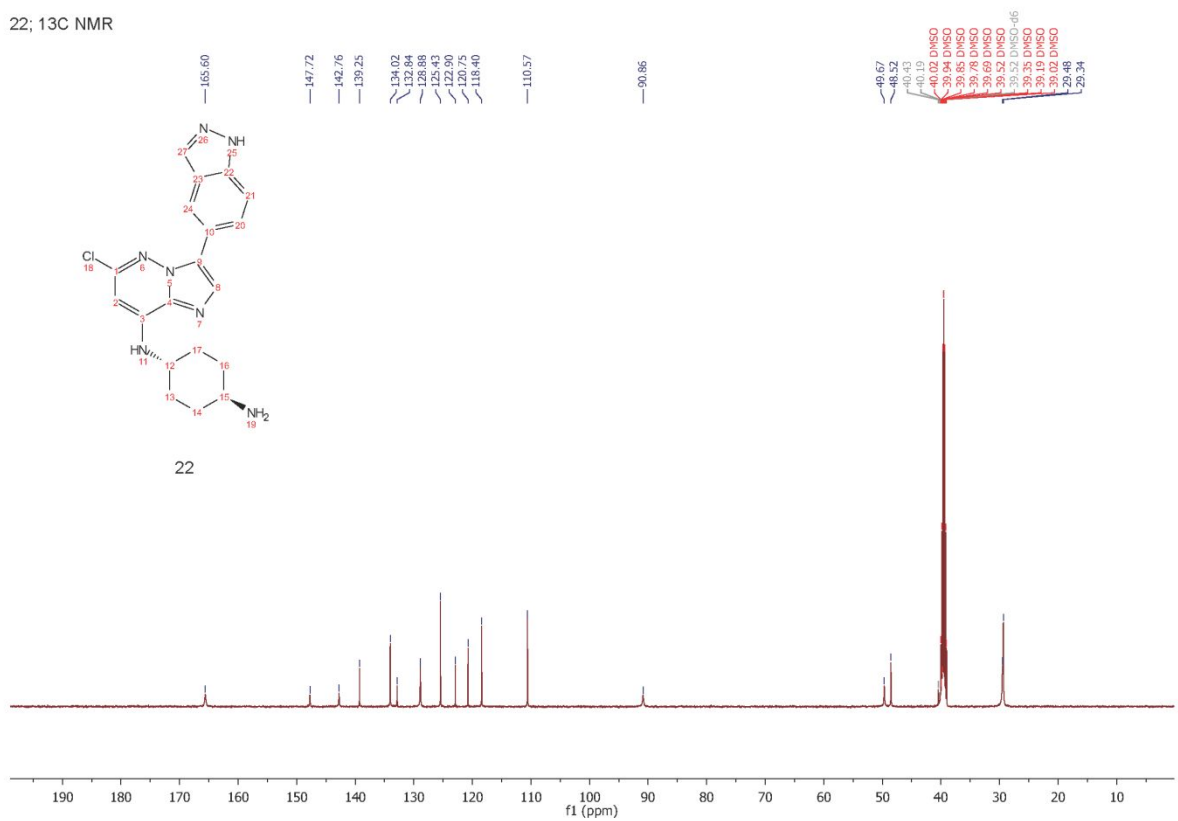

23; <sup>1</sup>H NMR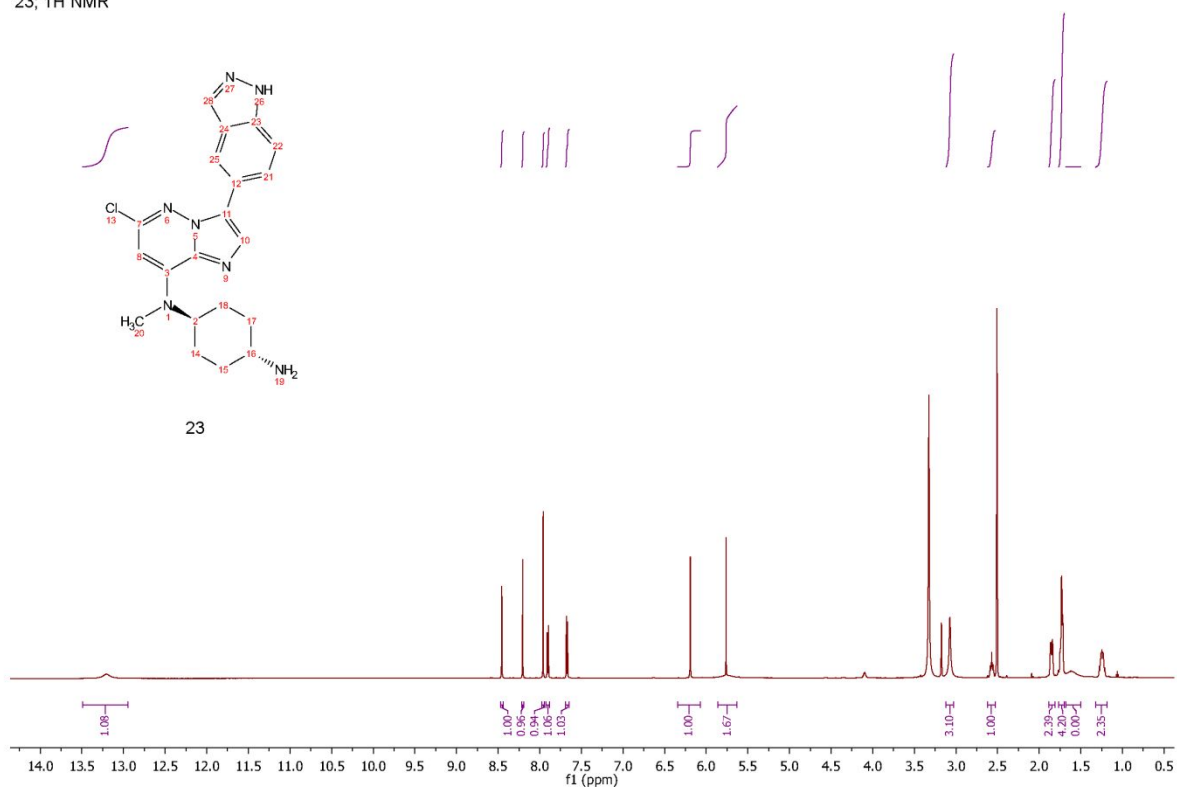23; <sup>13</sup>C NMR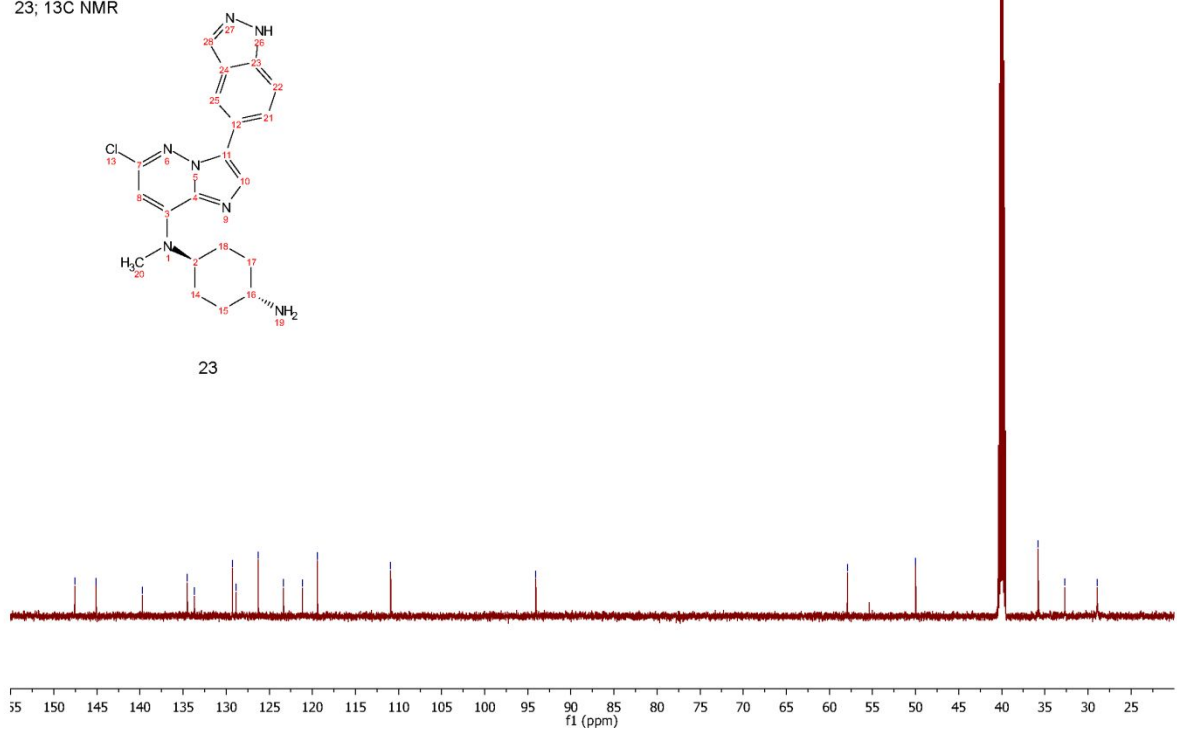



24; <sup>1</sup>H NMR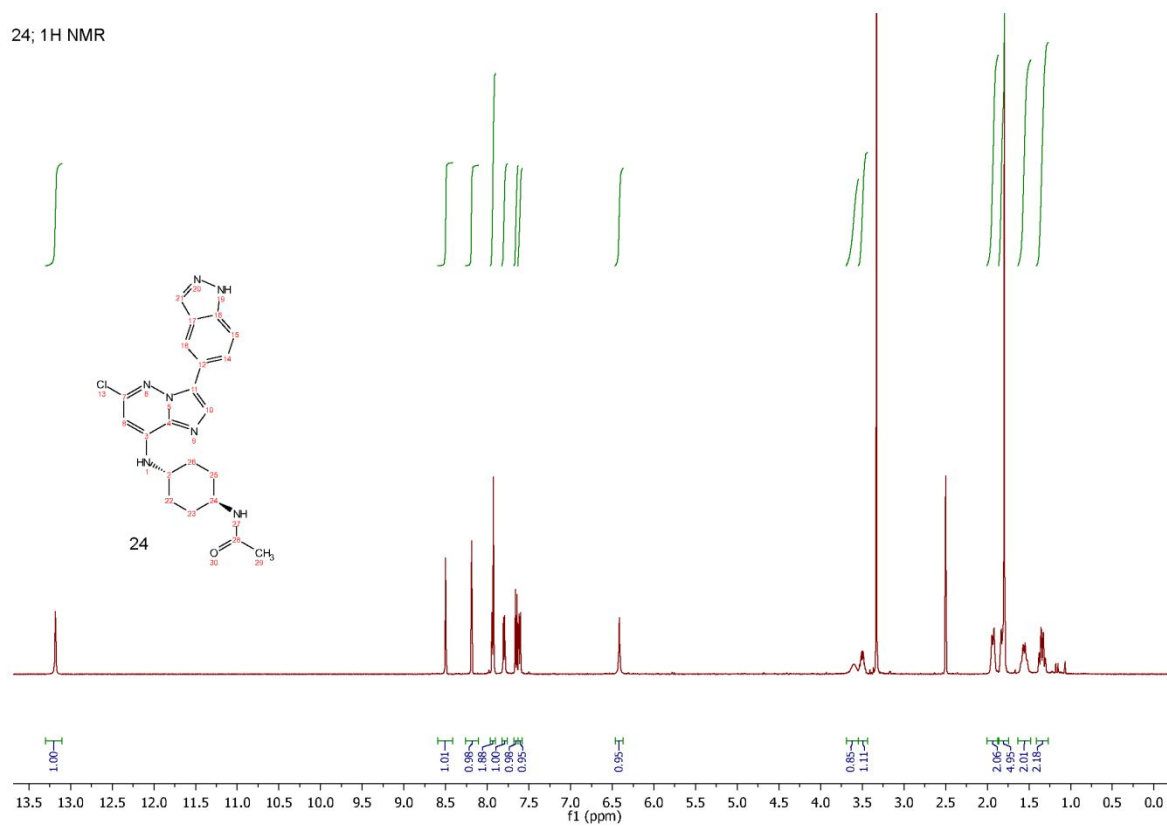24; <sup>13</sup>C NMR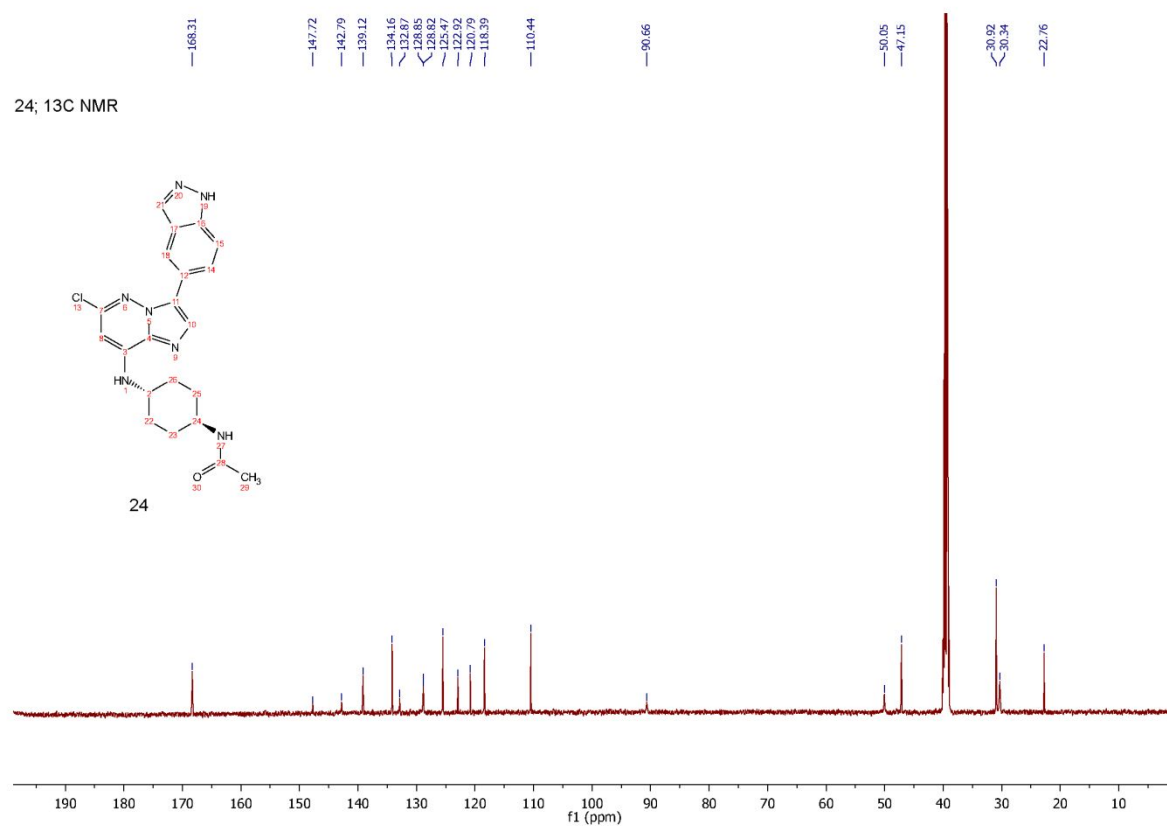

25; <sup>1</sup>H NMR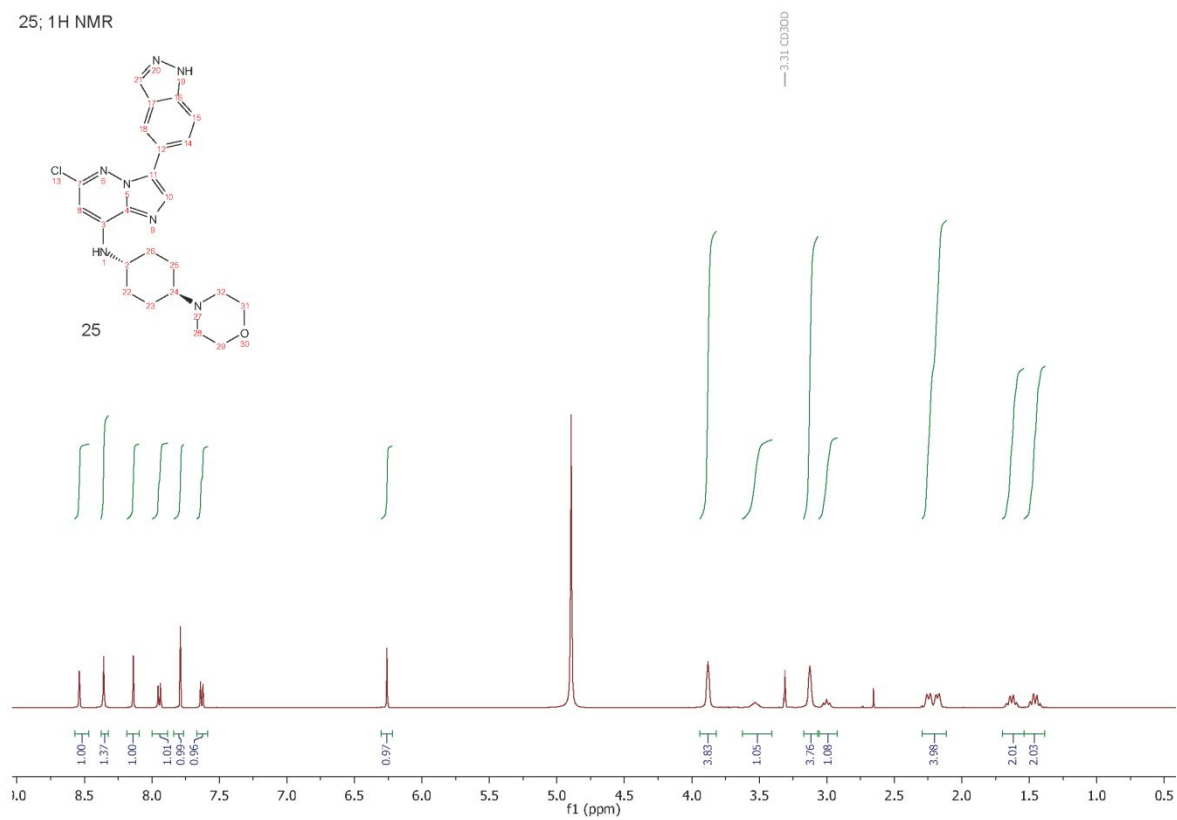25; <sup>13</sup>C NMR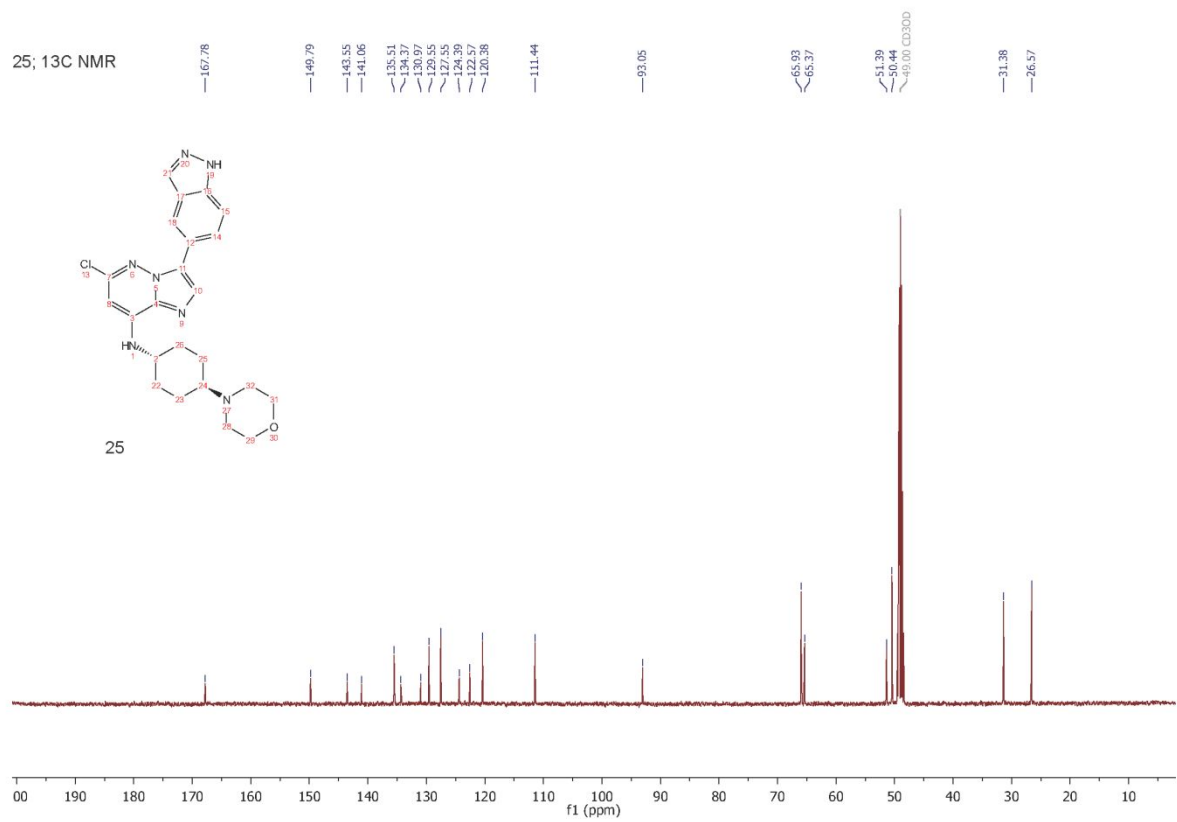

26; <sup>1</sup>H NMR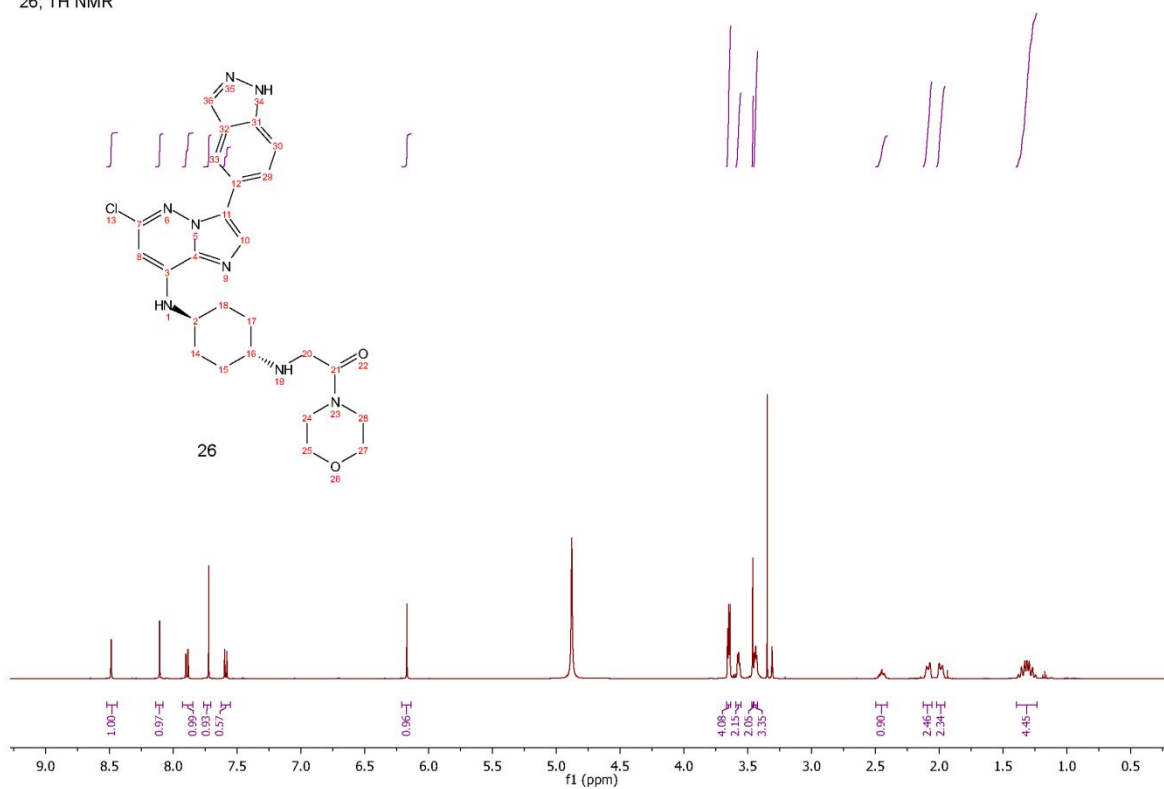26; <sup>13</sup>C NMR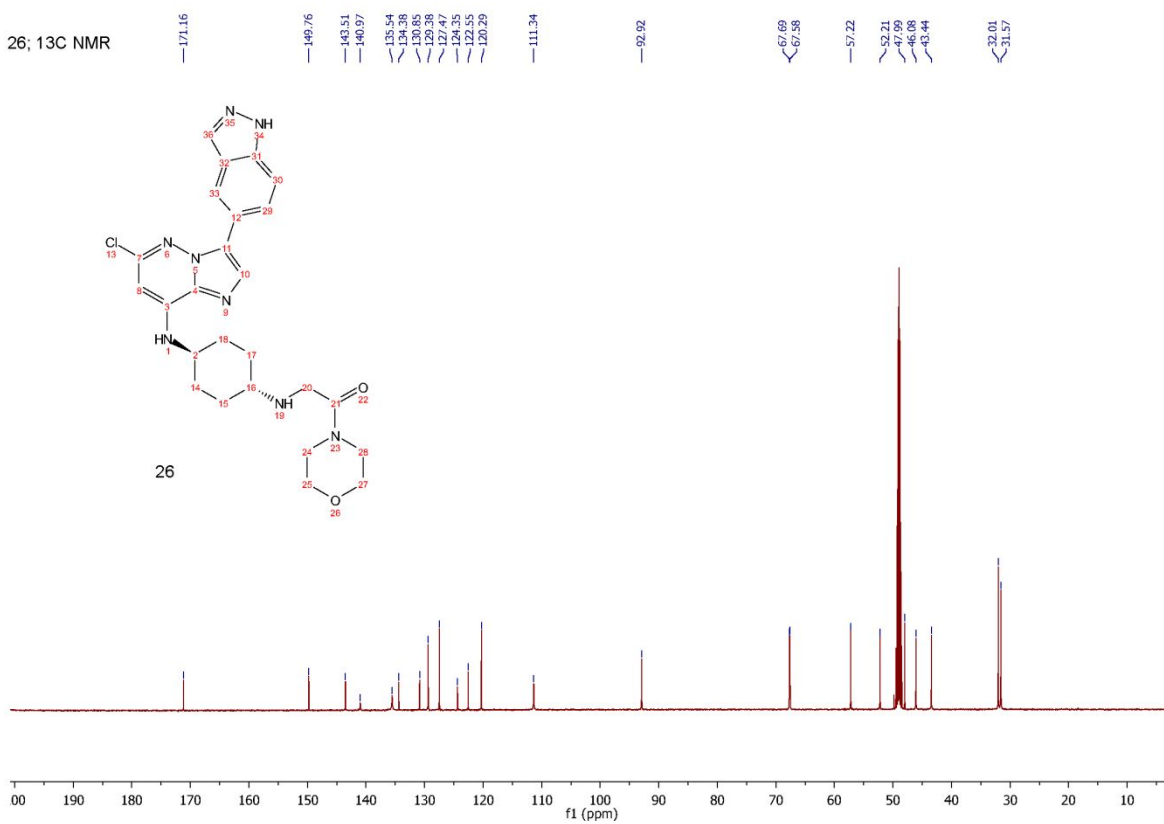

27; <sup>1</sup>H NMR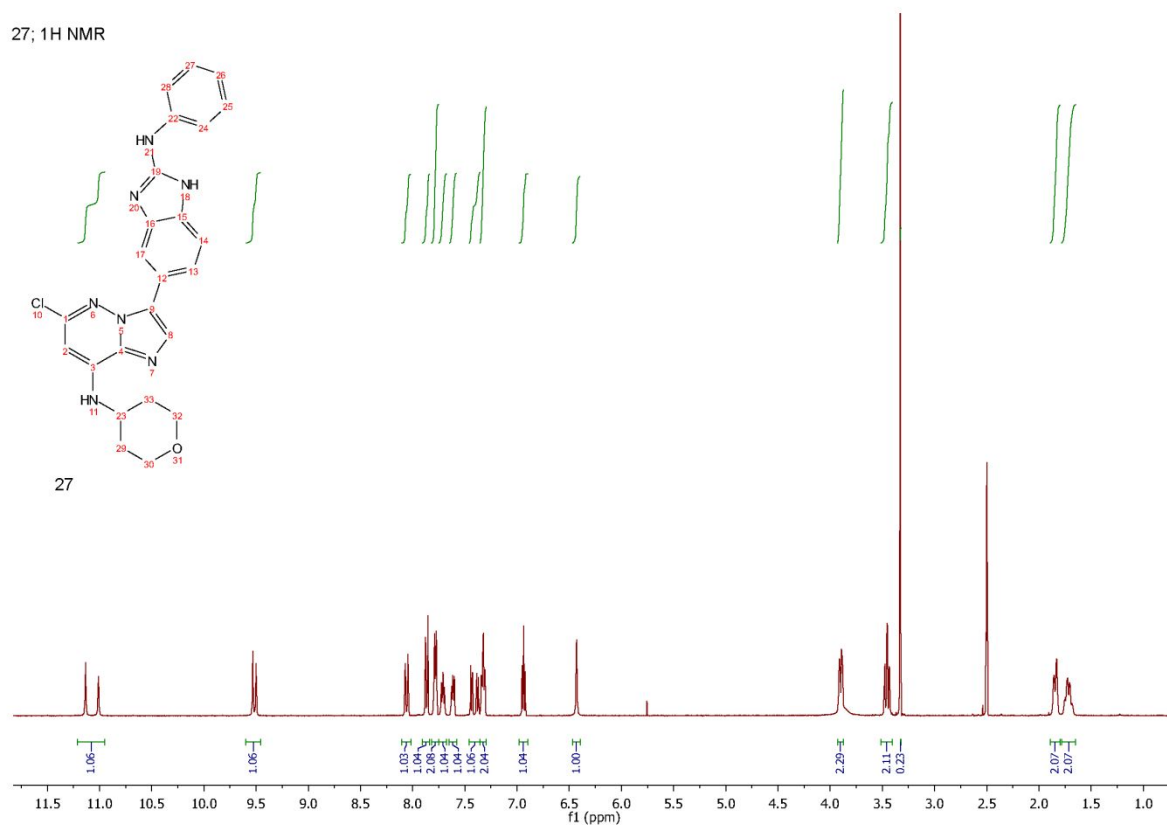27; <sup>13</sup>C NMR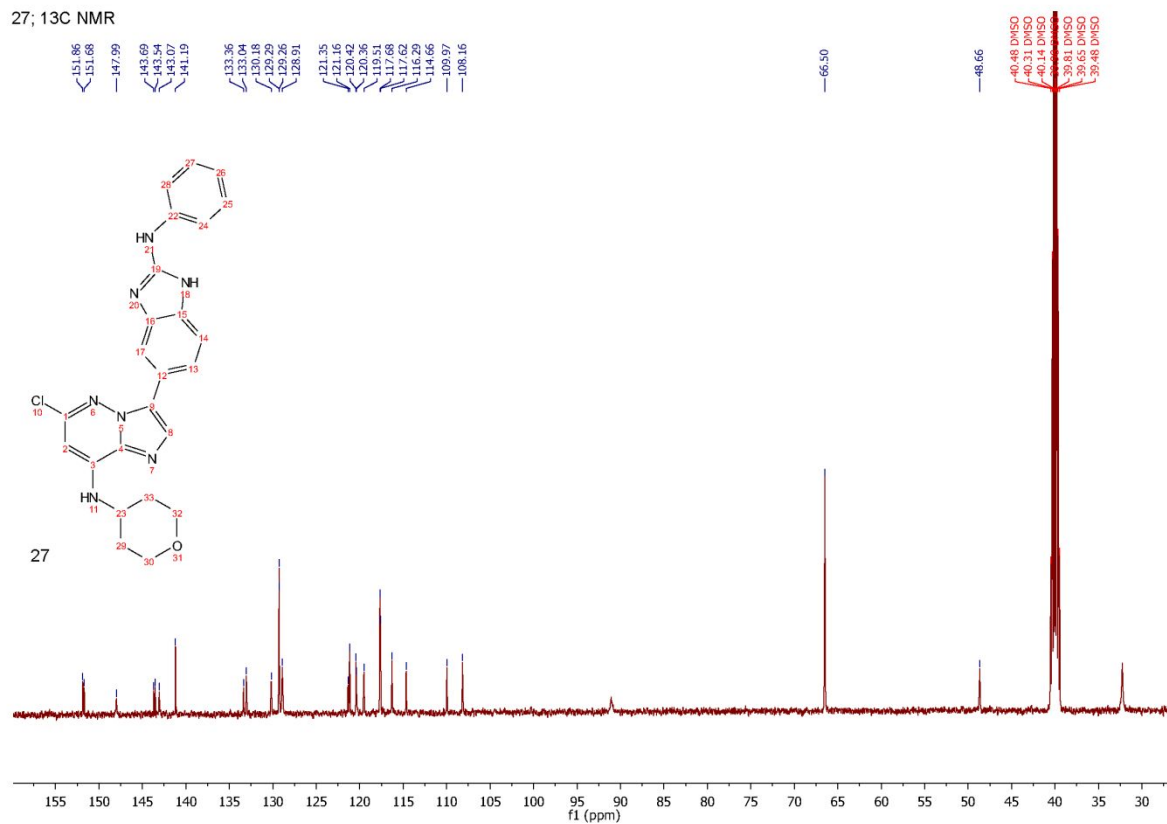

28; <sup>1</sup>H NMR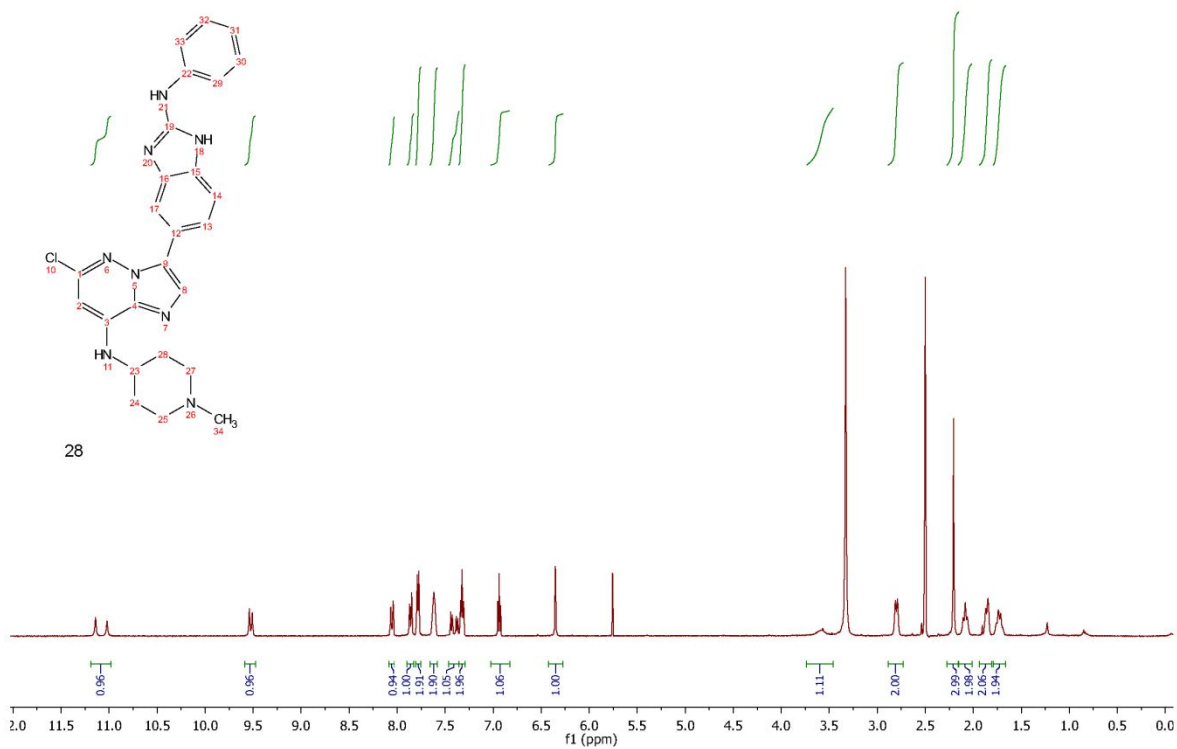28; <sup>13</sup>C NMR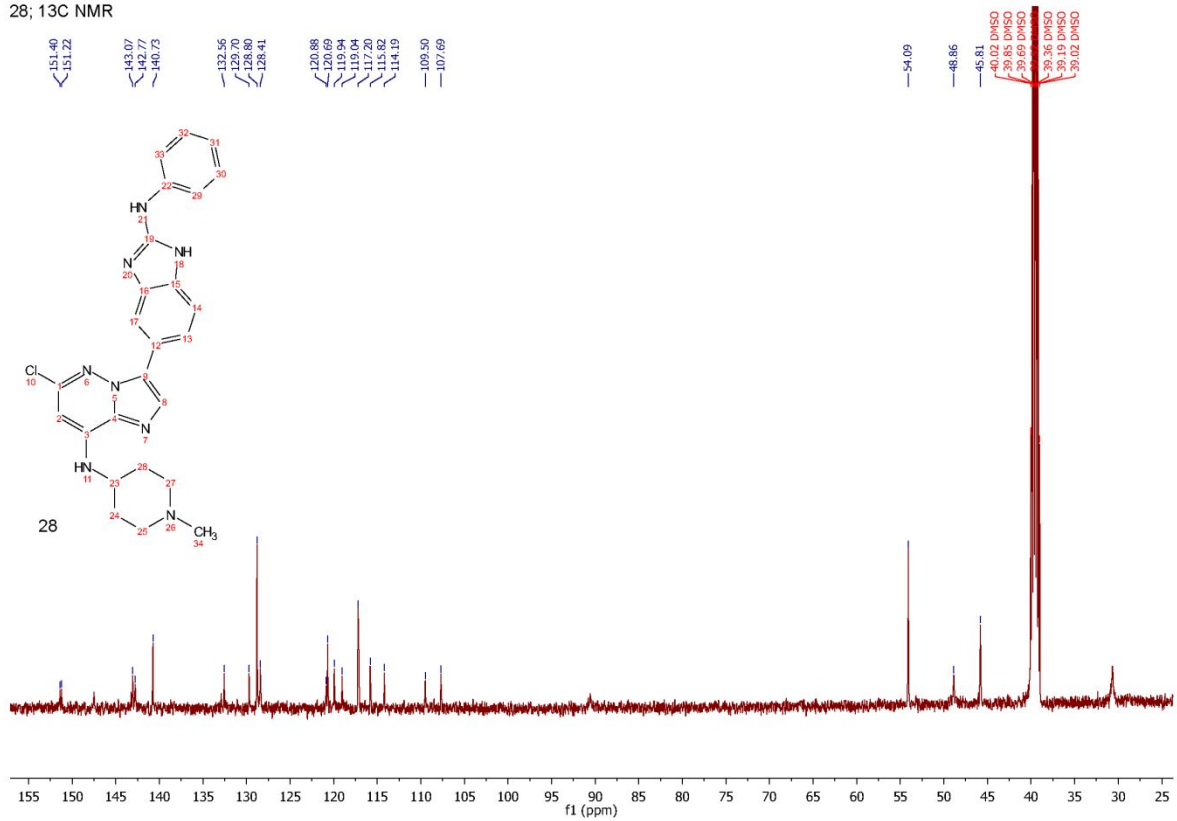

29; <sup>1</sup>H NMR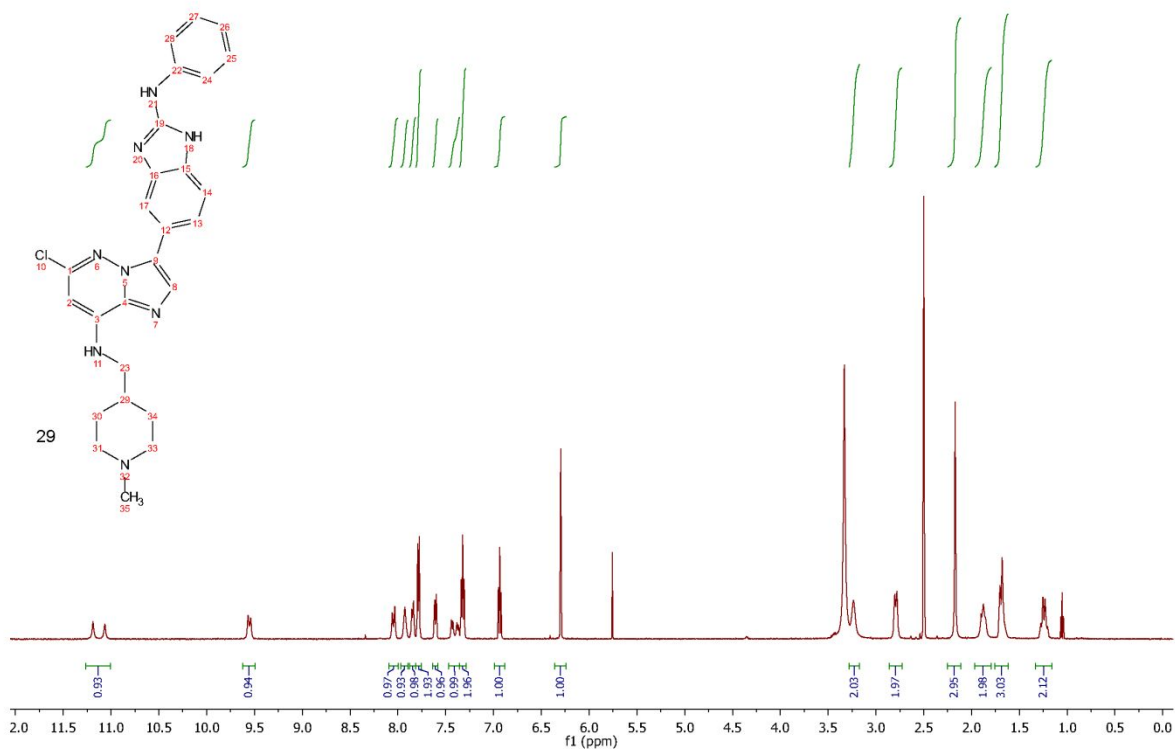29; <sup>13</sup>C NMR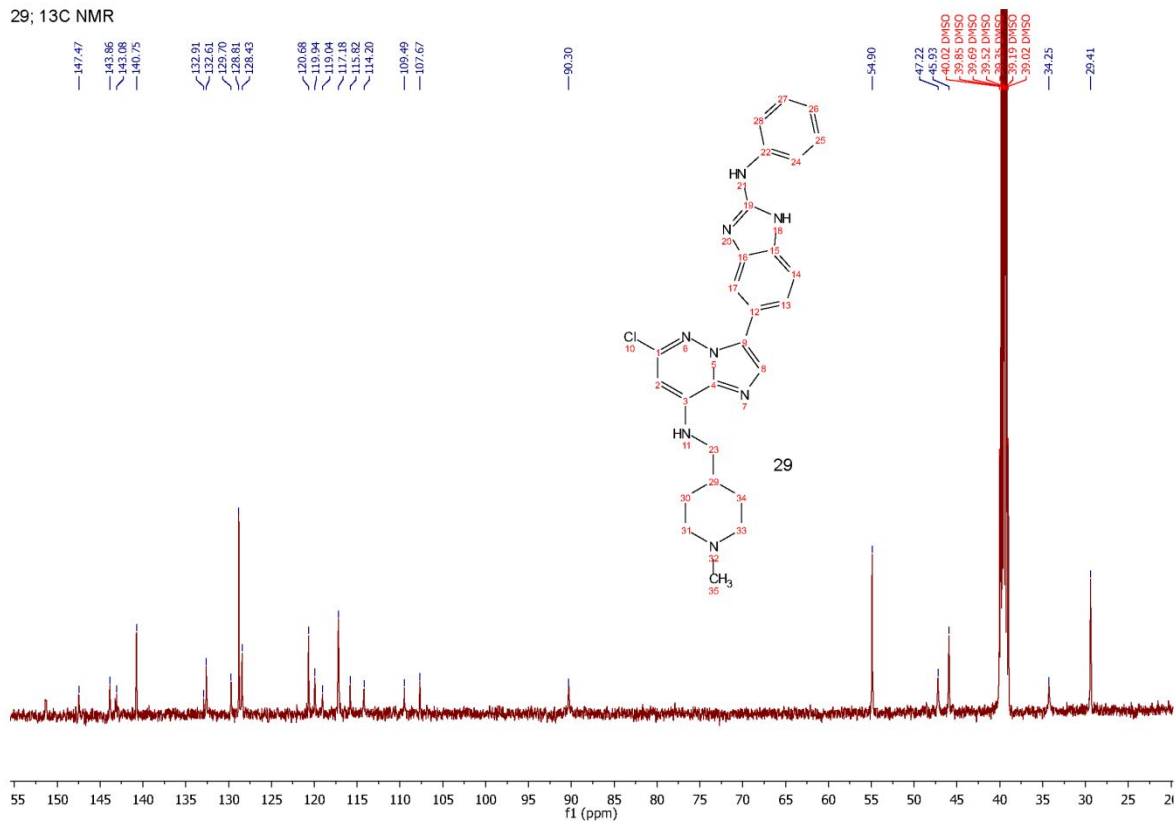

30; <sup>1</sup>H NMR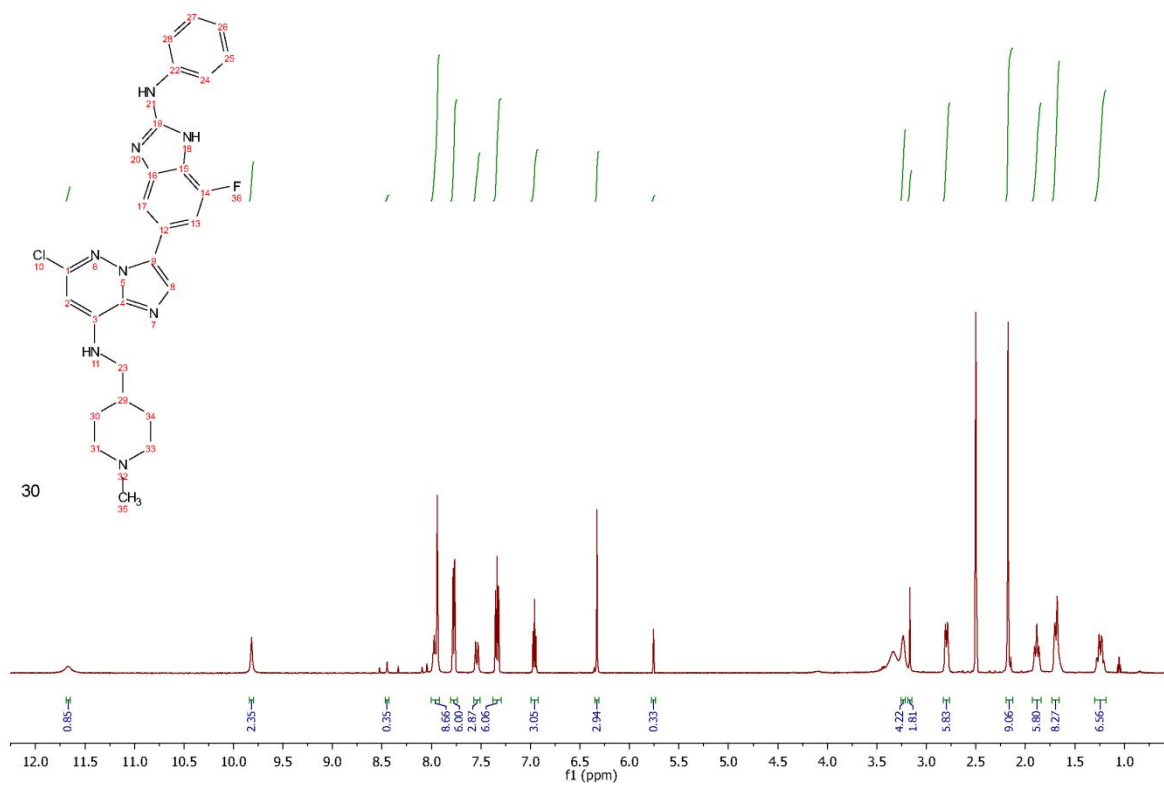30; <sup>13</sup>C NMR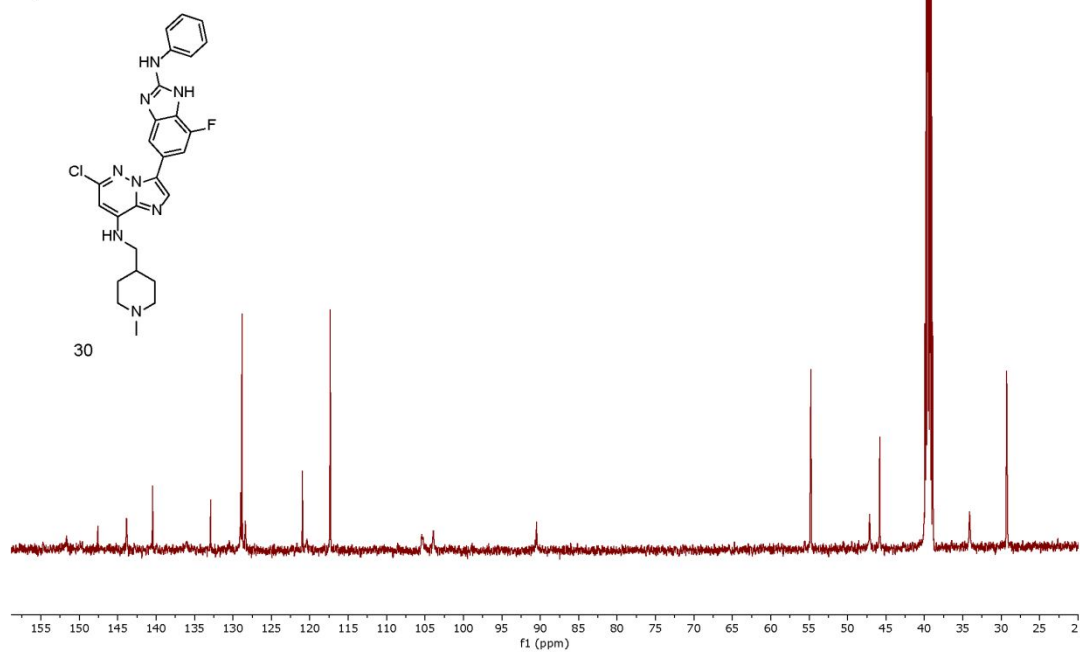

## 30; 13 C DEPT NMR

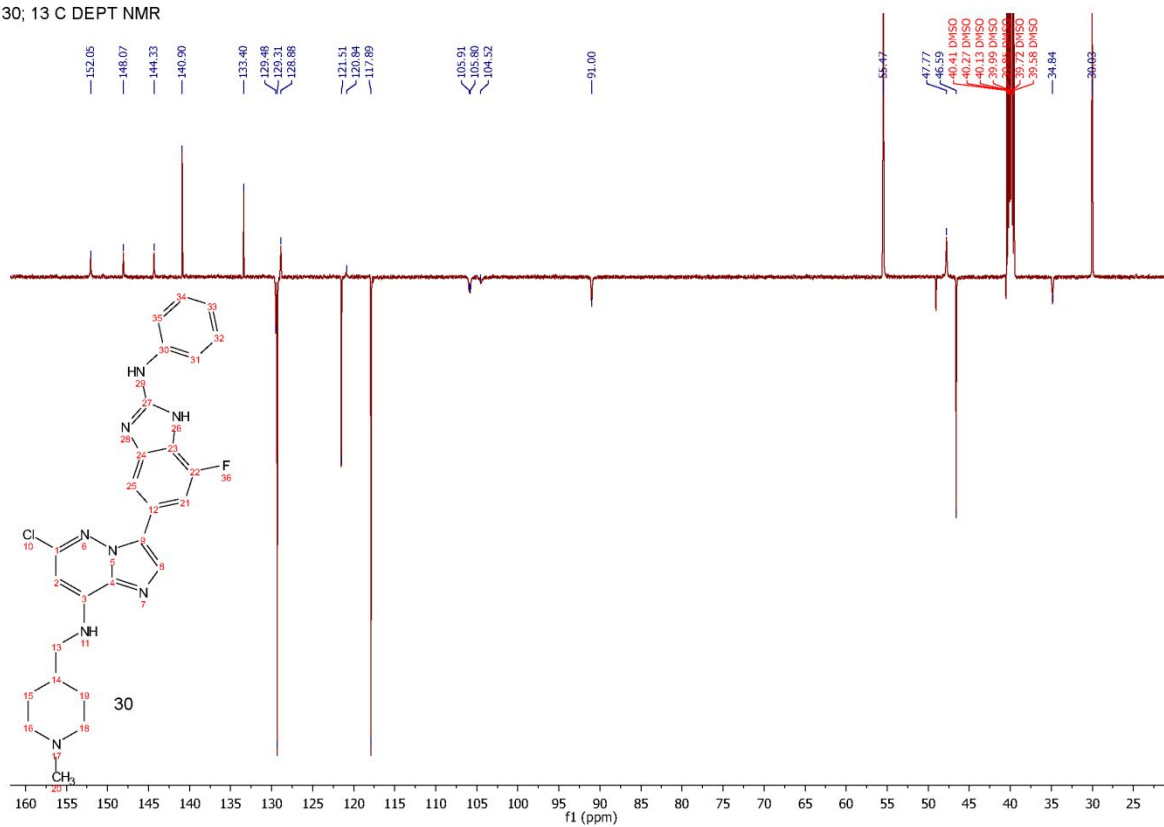



31; 1H NMR

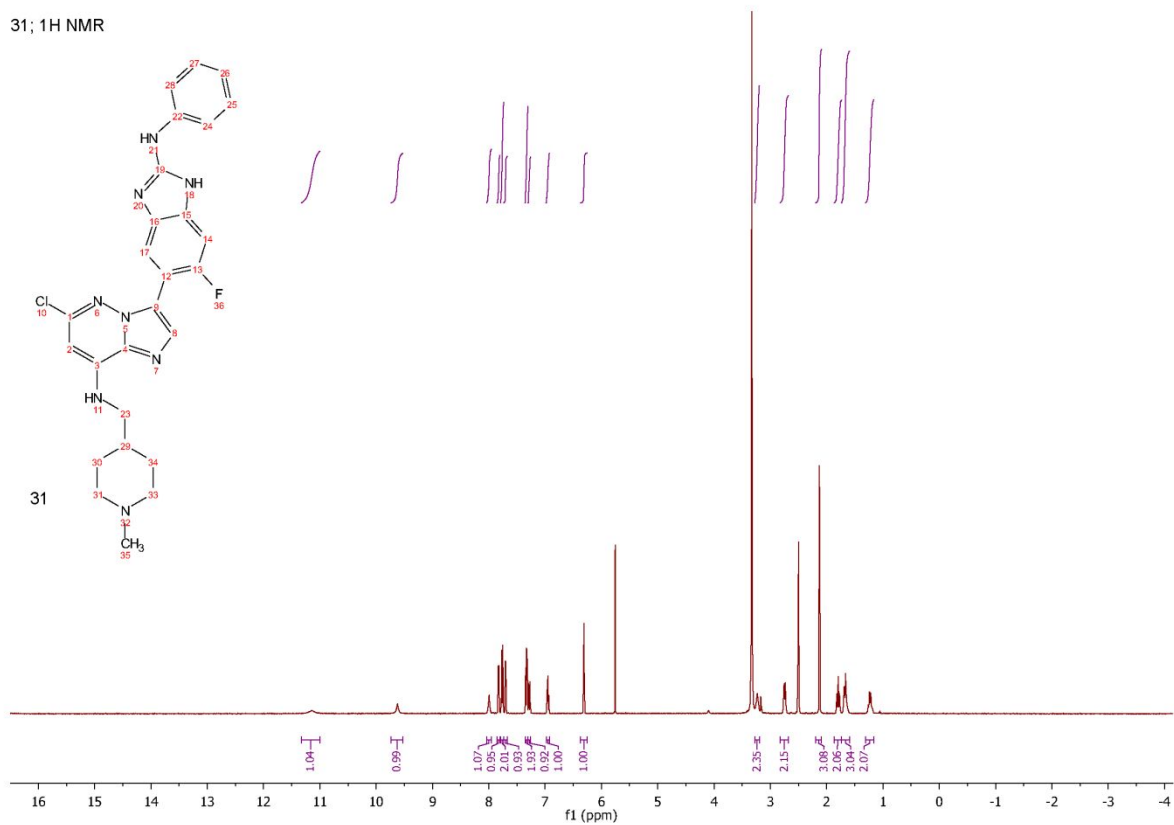

31; 13C NMR

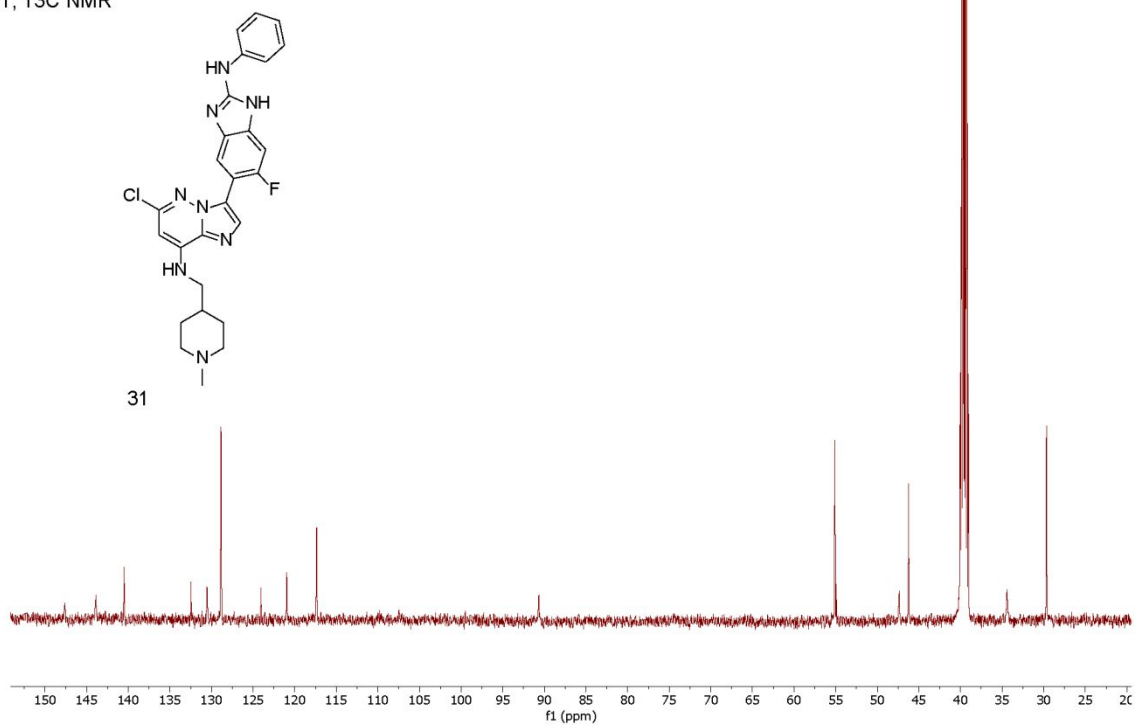

31; <sup>13</sup>C DEPT NMR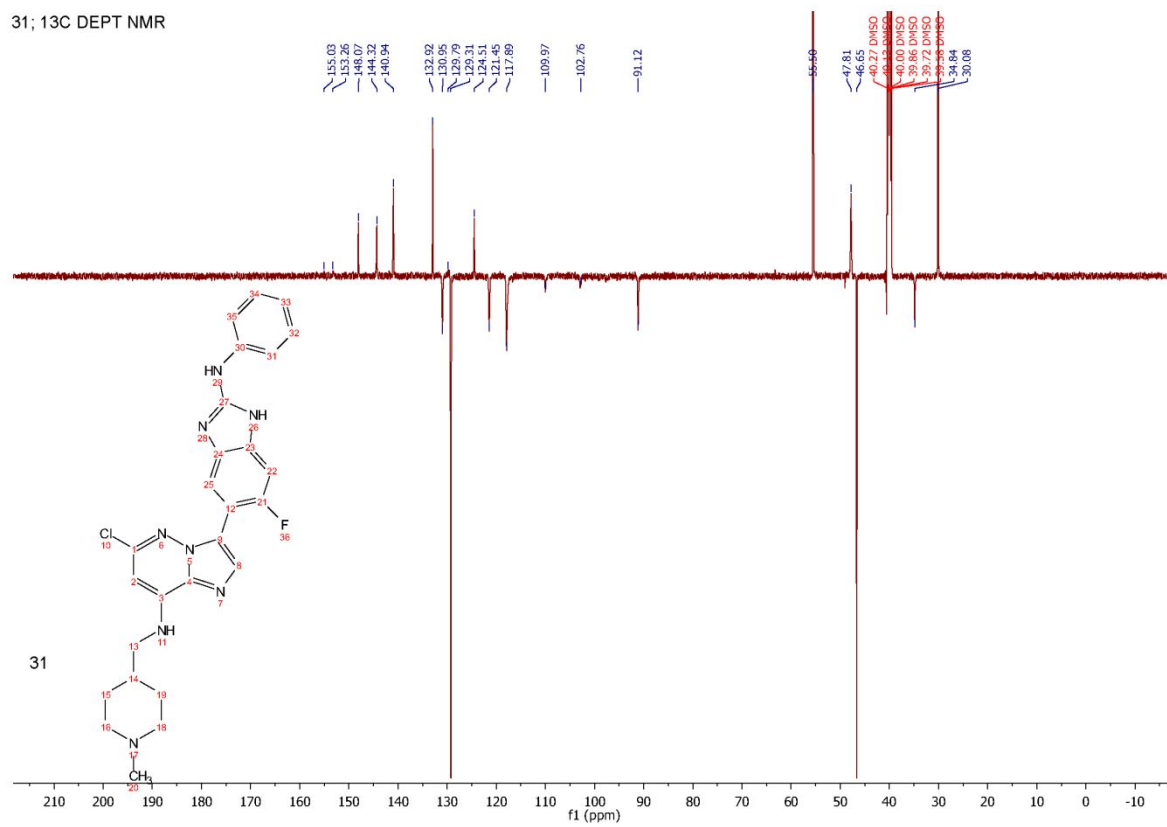

32; <sup>1</sup>H NMR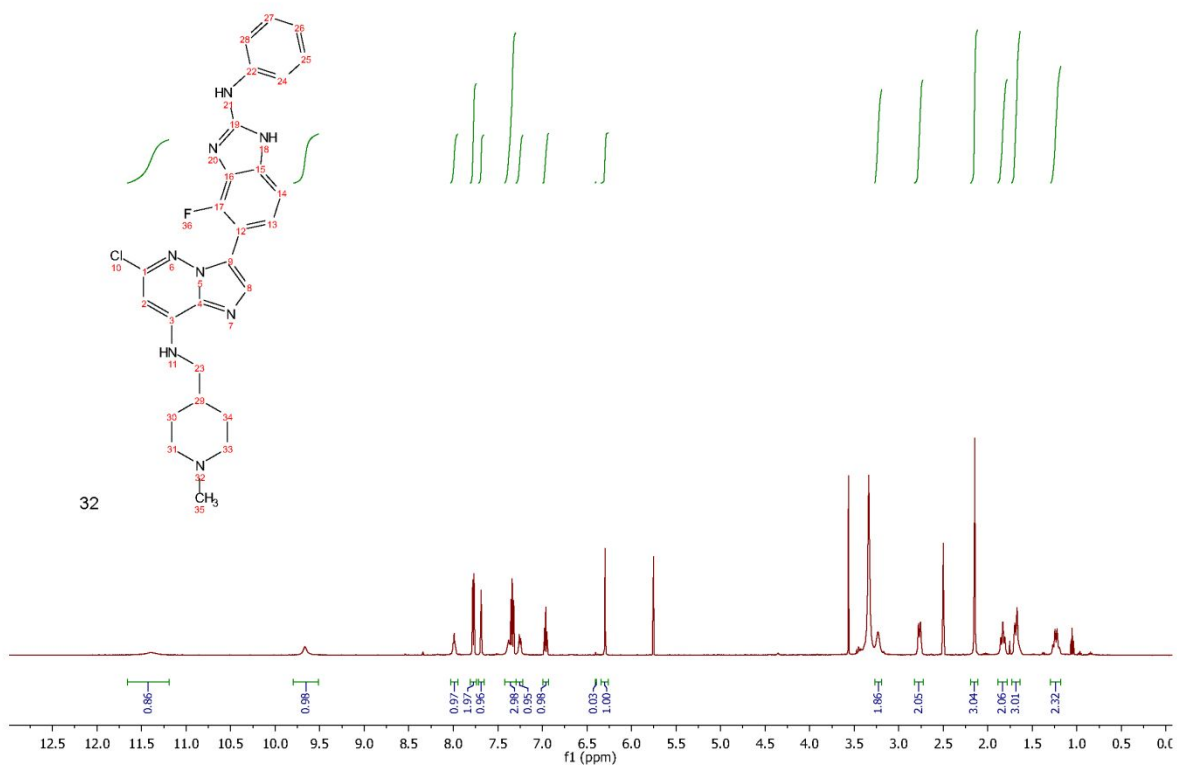32; <sup>13</sup>C NMR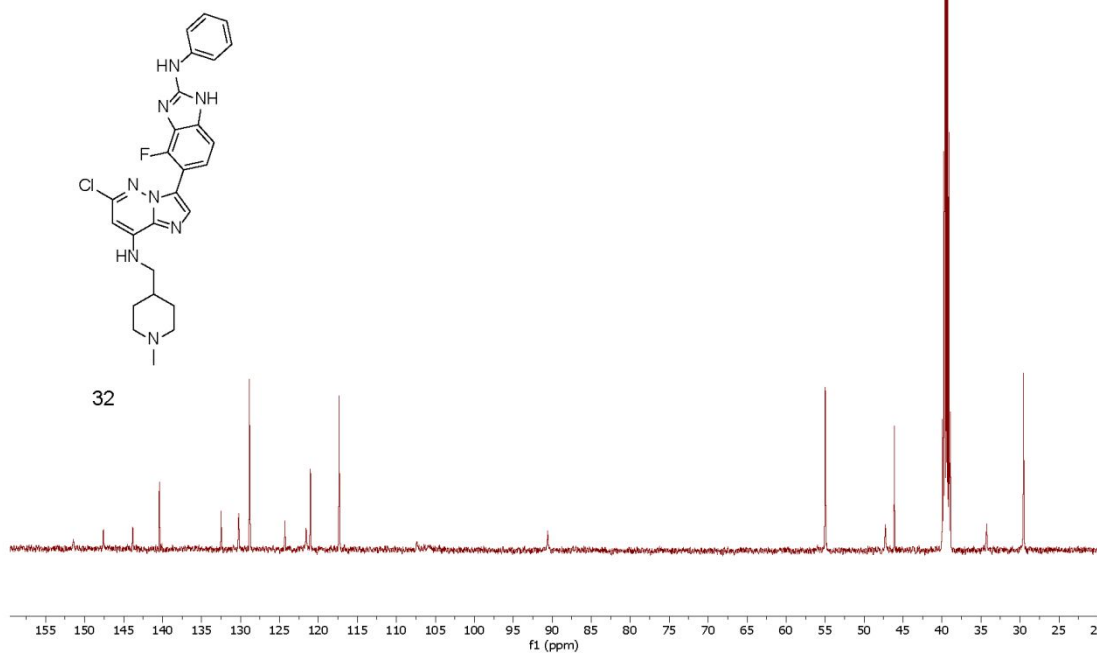

32; <sup>13</sup>C DEPT NMR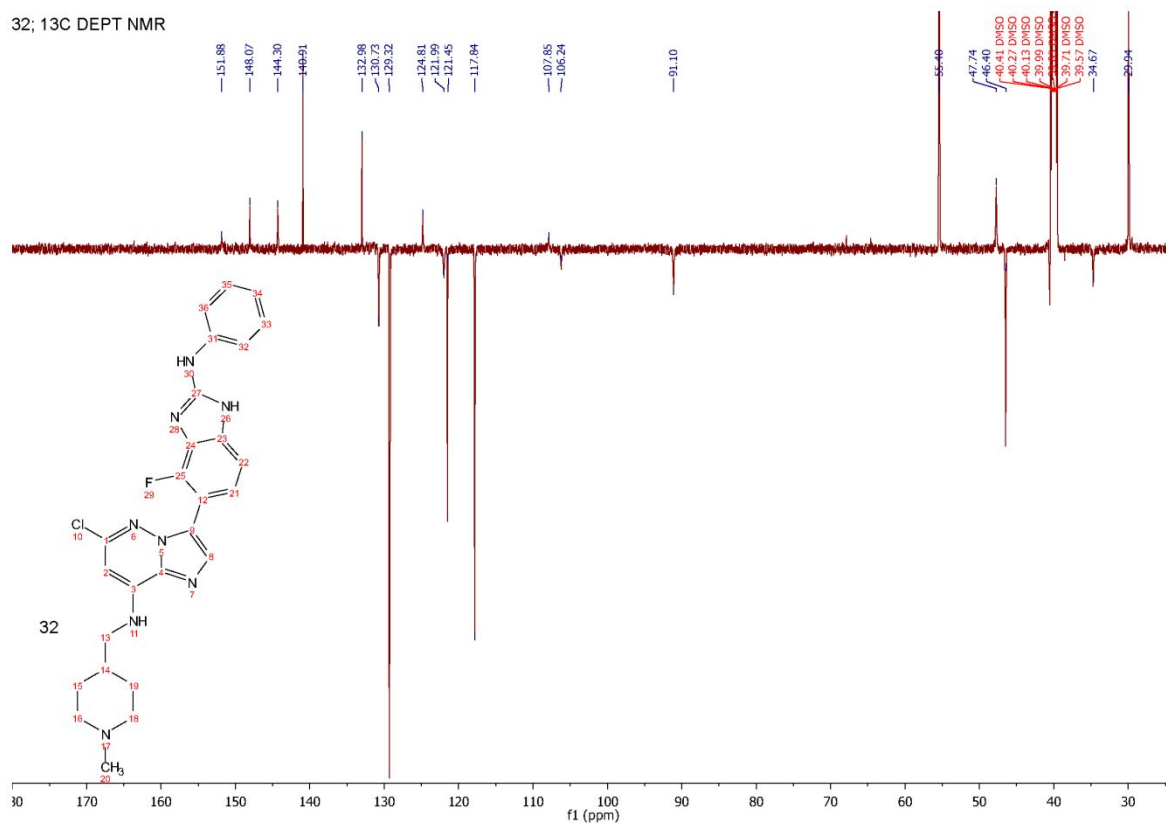

## 33; 1H NMR

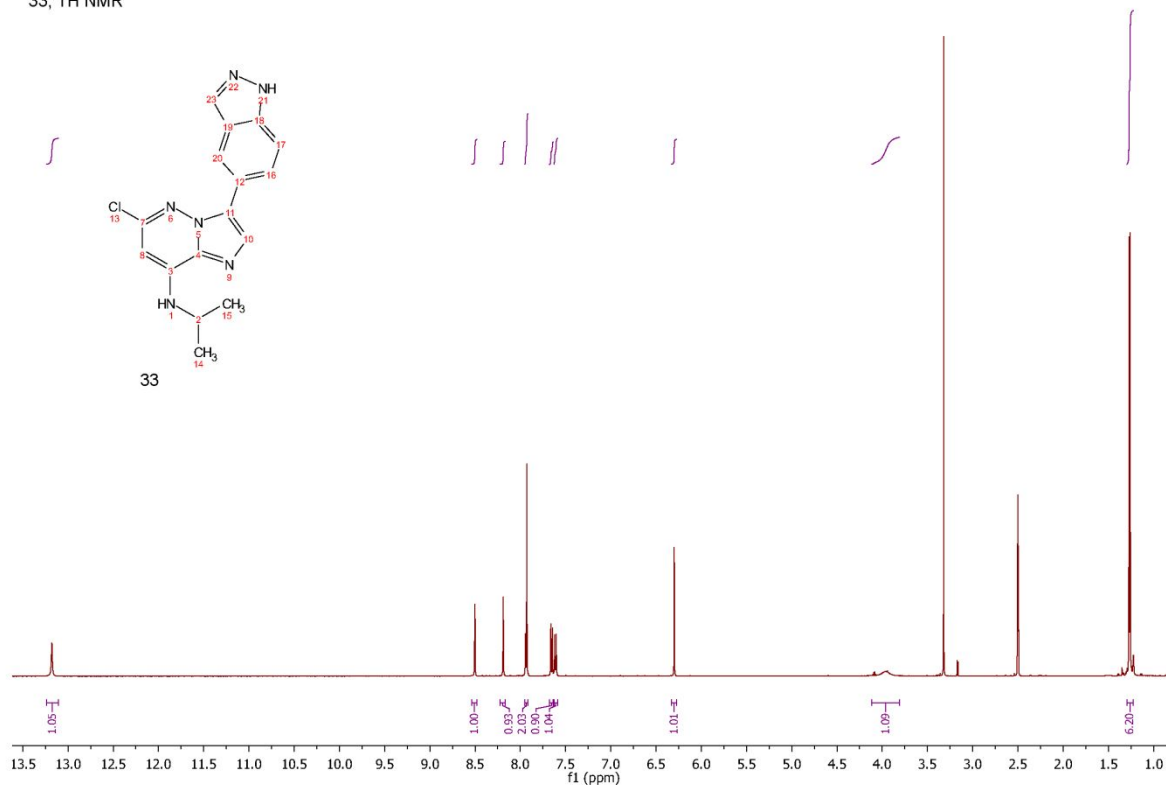

## 33; 13C NMR

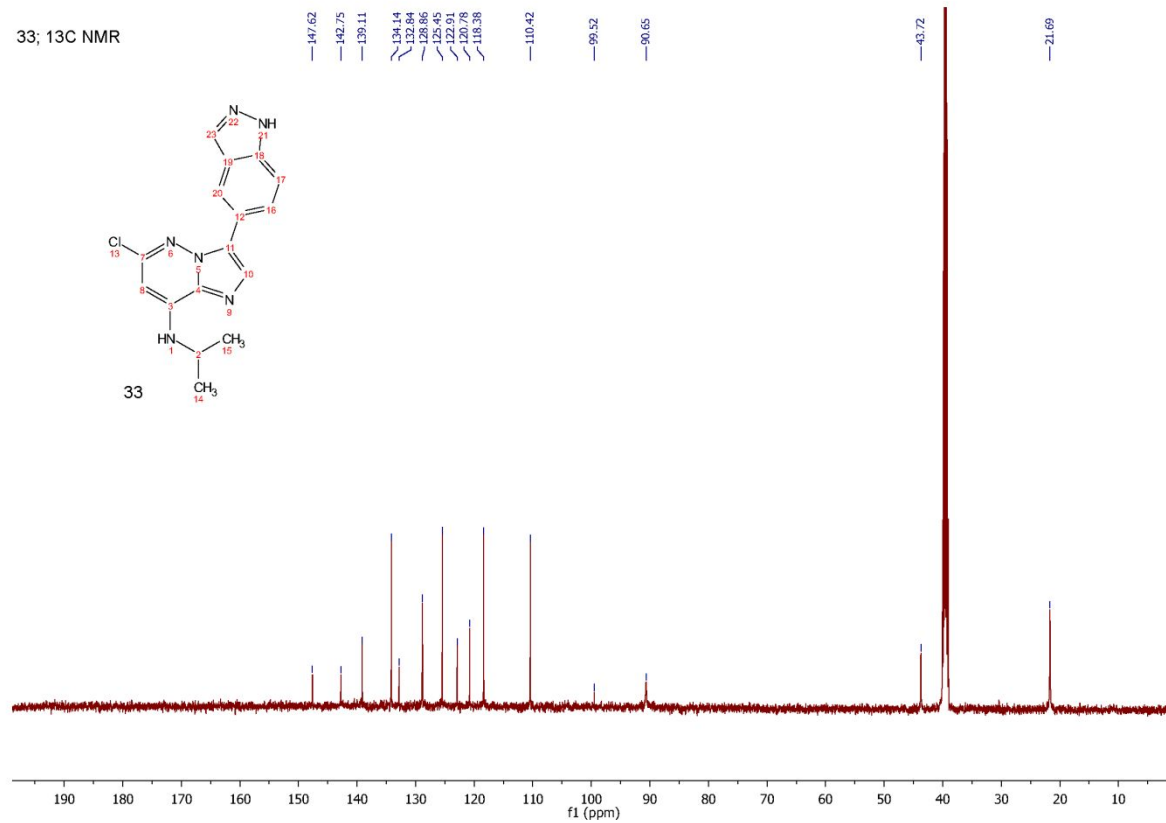

**24. Copies of HPLC traces for test compounds 2, 5 – 12, 19 – 33.****Compound 2**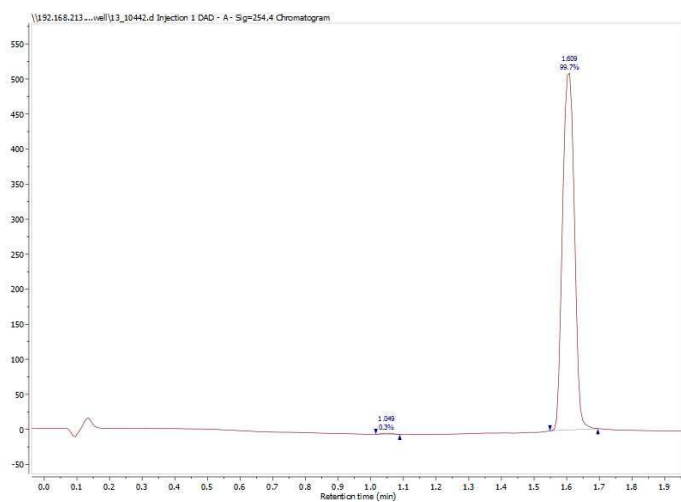**Compound 5**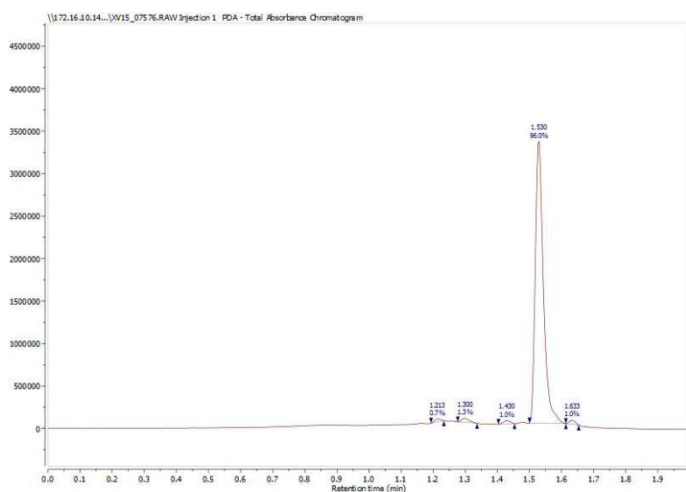**Compound 6**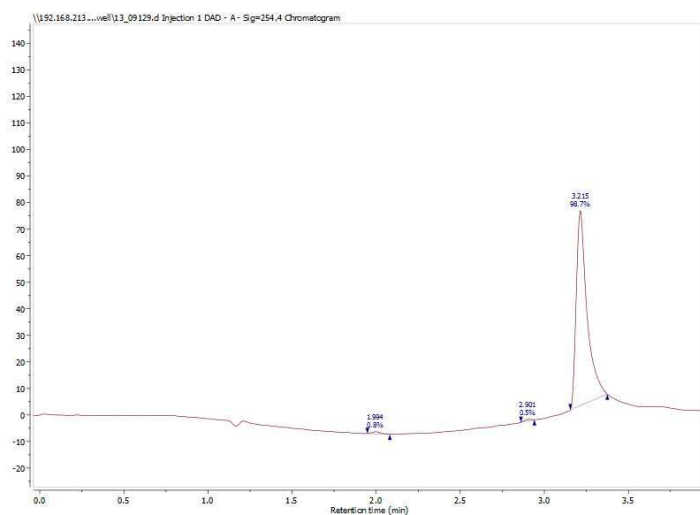

## Compound 7

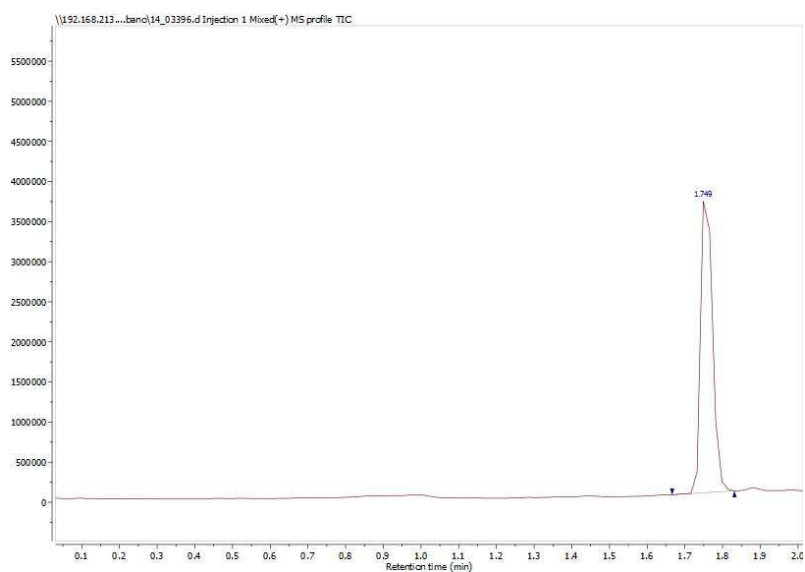

## Compound 8

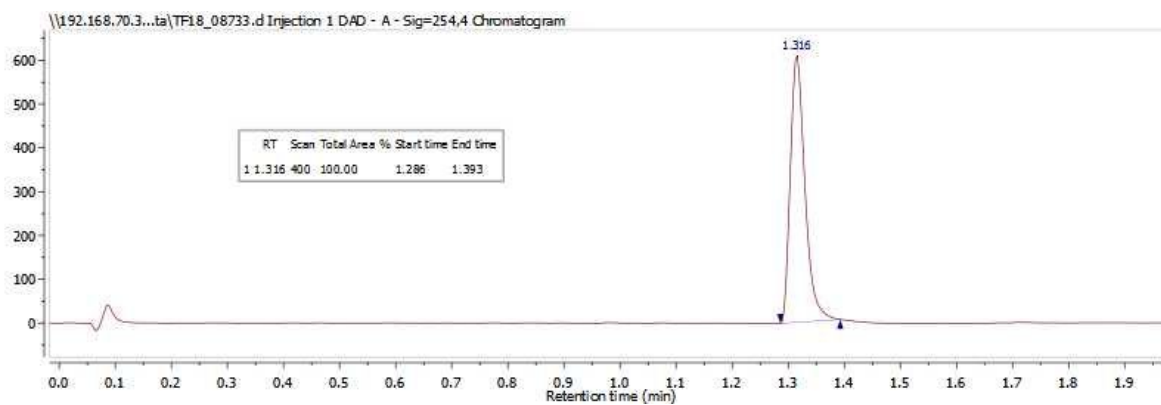

## Compound 9

3: UV Detector: TIC

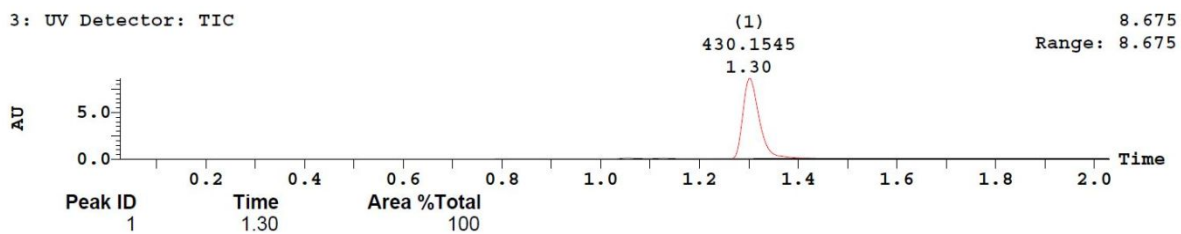

## Compound 10

3: UV Detector: 254

1.335

Range: 1.335

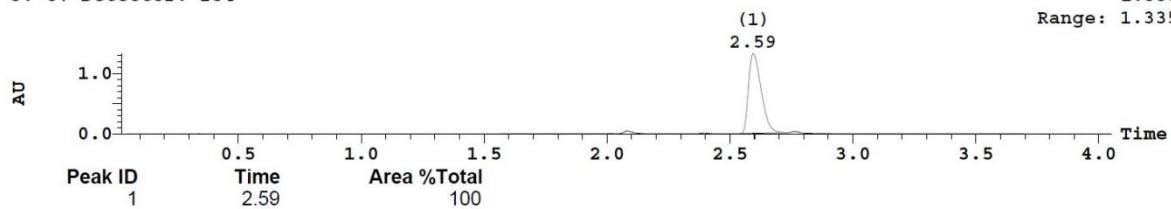

## Compound 11

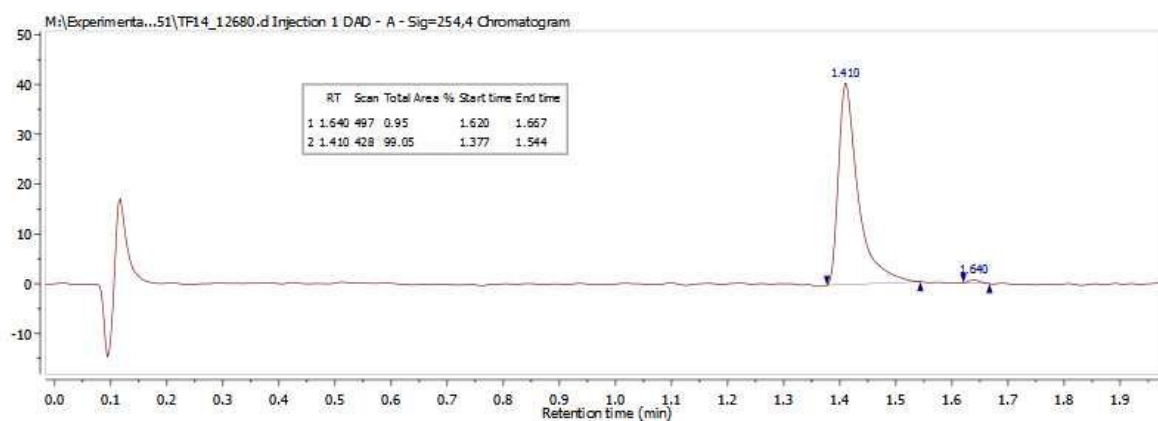

## Compound 12

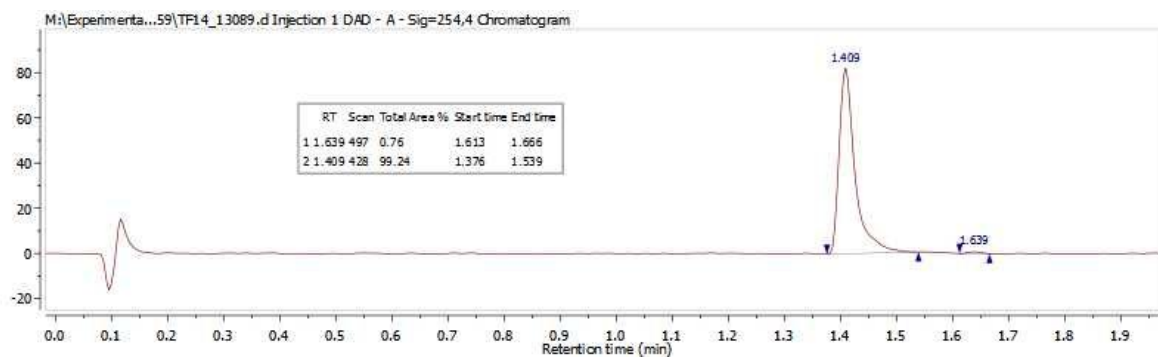

## Compound 19

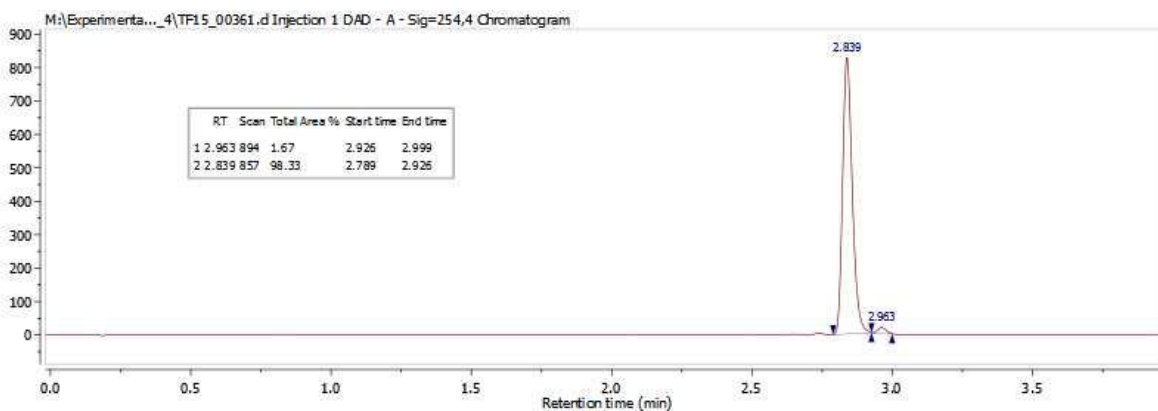



## Compound 20

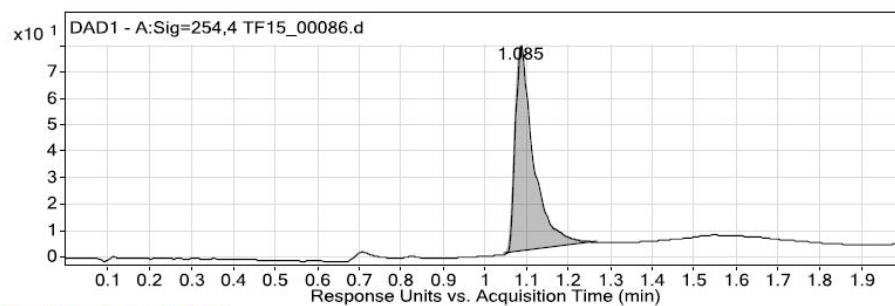

User Chromatogram Peak List

| Peak # | RT (mins) | Area   | Area Sum % |
|--------|-----------|--------|------------|
| 1      | 1.085     | 241.69 | 100        |

## Compound 21

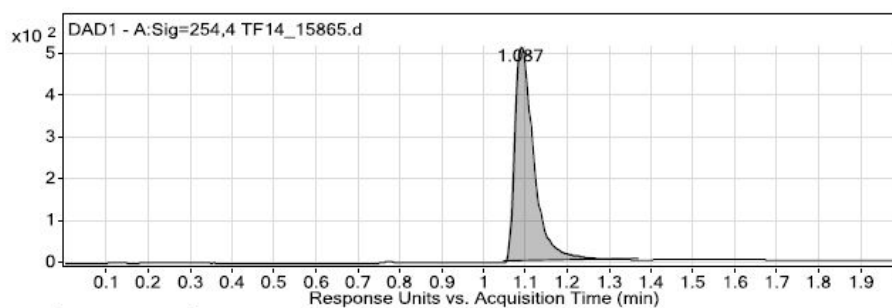

User Chromatogram Peak List

| Peak # | RT (mins) | Area    | Area Sum % |
|--------|-----------|---------|------------|
| 1      | 1.087     | 1644.09 | 100        |

## Compound 22

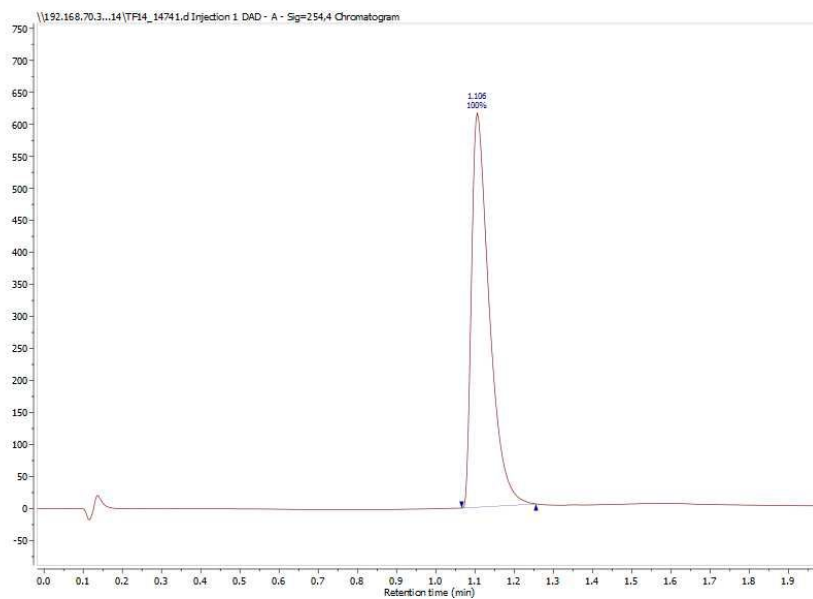

## Compound 23

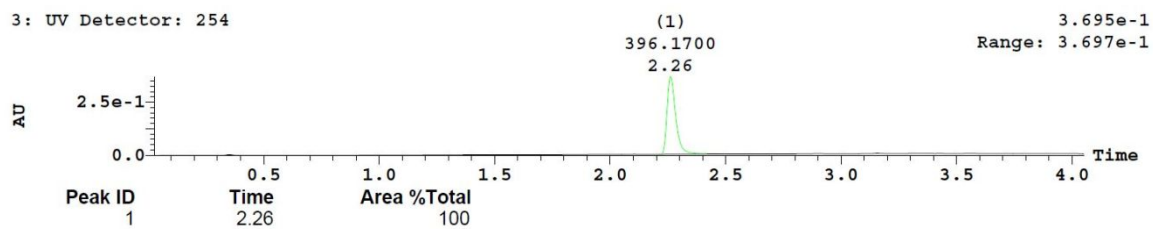

## Compound 24

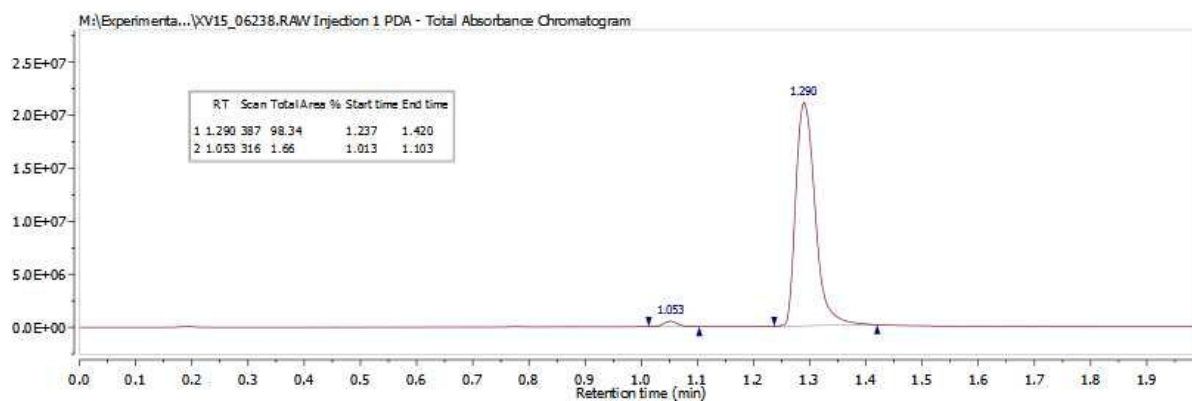

## Compound 25

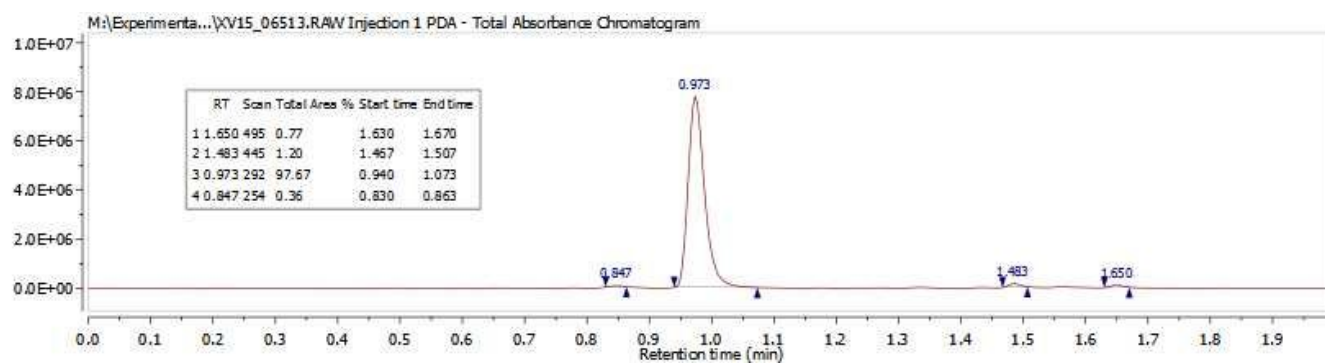

## Compound 26

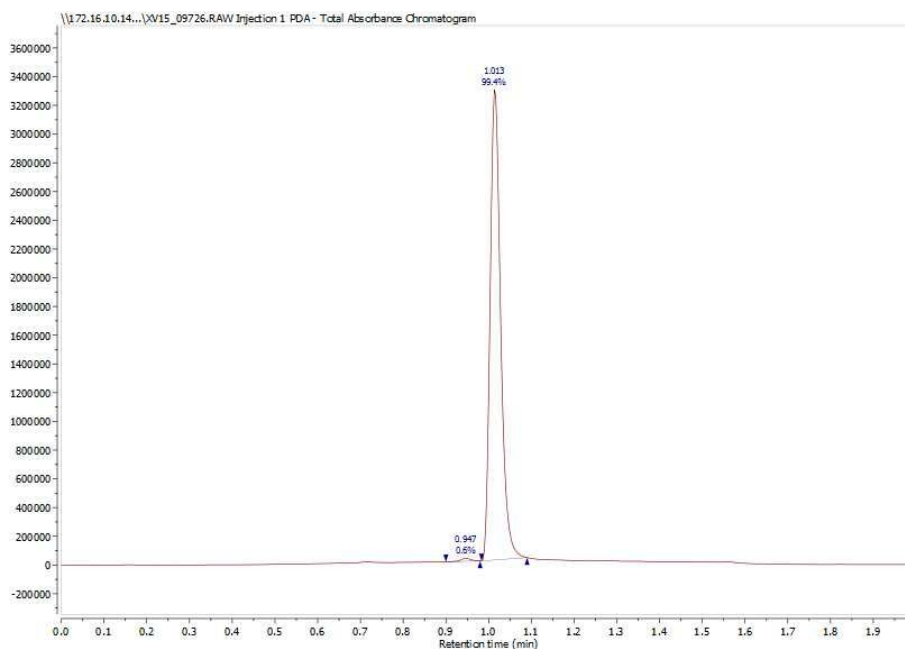

## Compound 27

3: UV Detector: 254

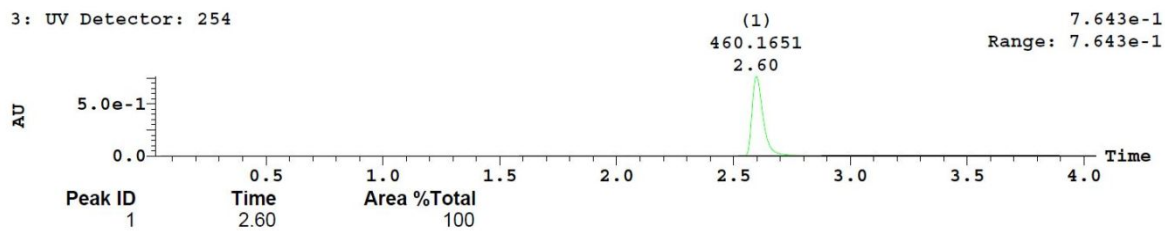

## Compound 28

3: UV Detector: 254

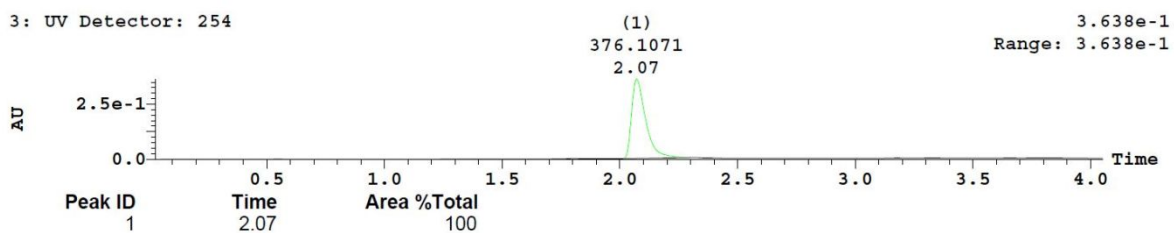

## Compound 29

3: UV Detector: 254

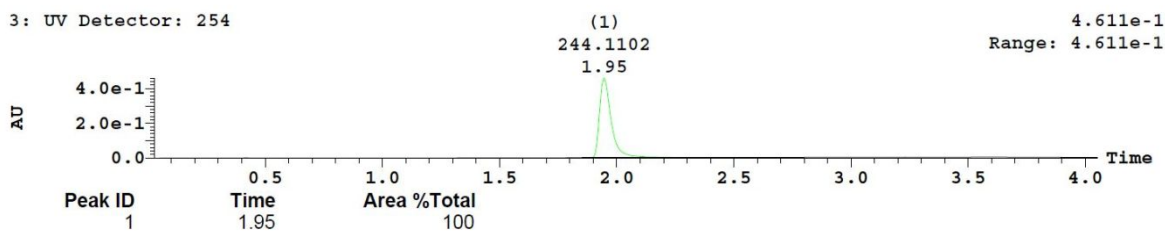

## Compound 30

3: UV Detector: 254

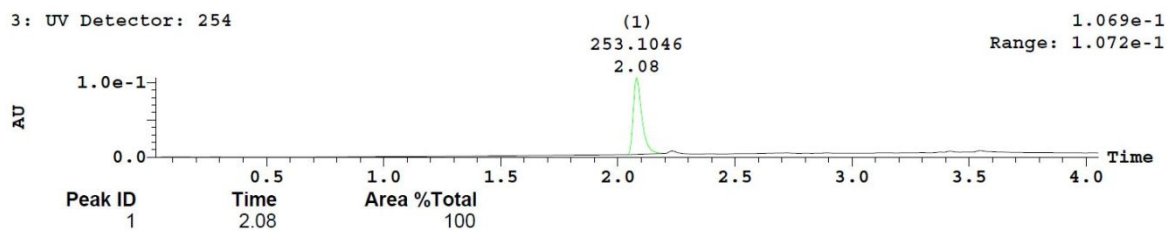

## Compound 31

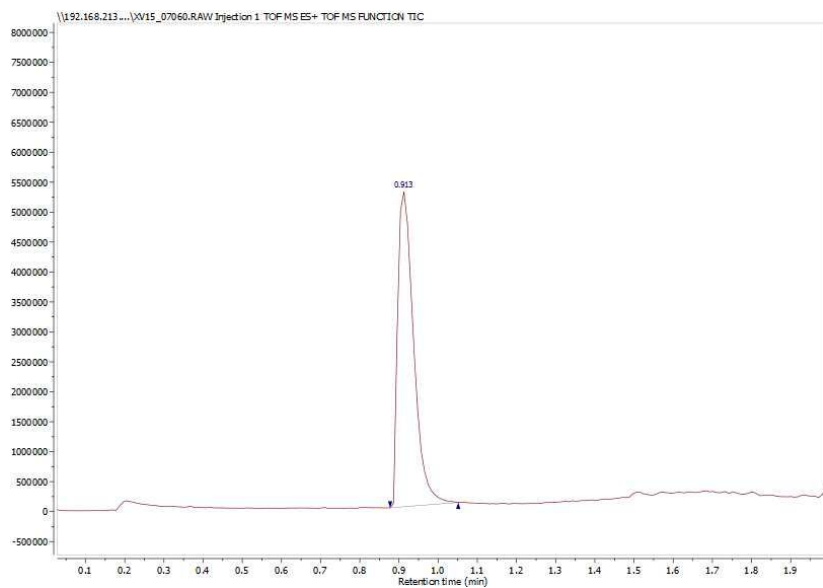

## Compound 32

3: UV Detector: TIC

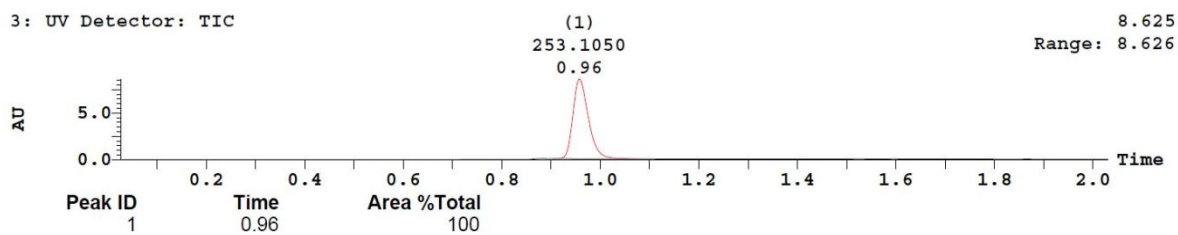

## Compound 33

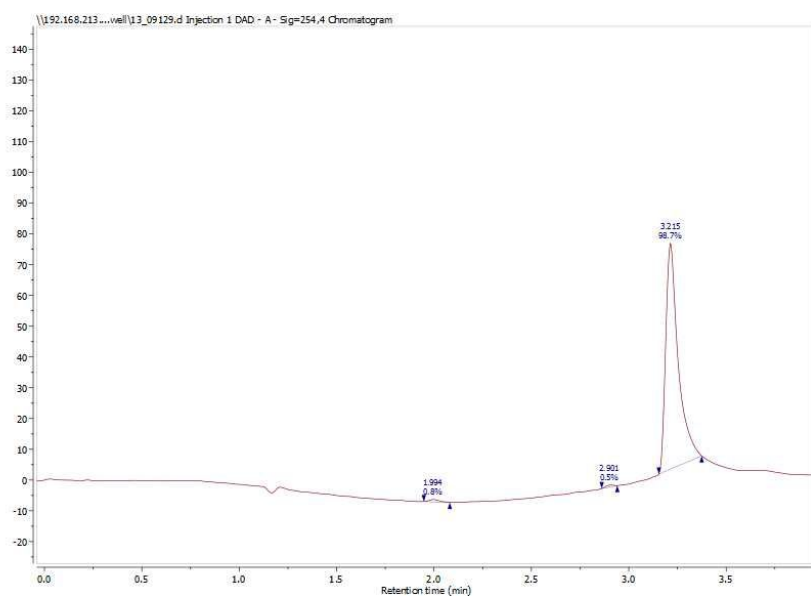

Supplement: jm8b01721_si_001.pdf [file jm8b01721_si_001.pdf]
